# Supplementary material for: Echolocation-related reversal of information flow in a cortical vocalization network
Source: Nat Commun. 2022 Jun 25;13:3642. doi: 10.1038/s41467-022-31230-6 (PMC9233670; doi:10.1038/s41467-022-31230-6)
Supplement: Supplementary file 4 — Source Data [file 41467_2022_31230_MOESM4_ESM.xlsx]

## Sheet: Fig. 1b-c
	Call length (s)
	Echolocation		0.00058	0.00072	0.000532	0.000396	0.000376	0.000532	0.00038	0.000376	0.00028	0.000612	0.000436	0.001132	0.000748	0.000504	0.000516	0.000408	0.000396	0.001756	0.000688	0.00178	0.000392	0.000436	0.00044	0.0008	0.000404	0.000376	0.000896	0.000476	0.00036	0.000376	0.00042	0.000288	0.001636	0.00172	0.001464	0.00042	0.002028	0.001956	0.0016	0.000956	0.001008	0.002068	0.001228	0.001804	0.001264	0.000396	0.00026
	Communication		0.007804	0.000956	0.000536	0.000568	0.001088	0.000632	0.000664	0.000376	0.00048	0.001528	0.000856	0.0006	0.000564	0.000696	0.000664	0.000536	0.000536	0.001056	0.001156	0.000308	0.000472	0.000436	0.020184	0.00058	0.000364	0.000416	0.003116	0.000532	0.000824	0.001032	0.001564	0.000532	0.001708	0.000784	0.000504	0.00814	0.00072	0.000528	0.000724	0.00112	0.00102	0.000564	0.001804	0.0211	0.0059	0.000564	0.000724
	Call peak freq (Hz)
	Echolocation		66406.2	83007.8	82031.2	78125	83984.4	84960.9	76171.9	60546.9	76171.9	56640.6	56640.6	70800.8	61523.4	48828.1	68359.4	64453.1	74218.8	48339.8	80078.1	80566.4	70312.5	85937.5	80078.1	74218.8	70312.5	60546.9	7812.5	42968.8	68359.4	76171.9	83984.4	89843.8	78125	77636.7	77636.7	78125	77148.4	77148.4	77148.4	90820.3	78125	76904.3	76171.9	78613.3	77148.4	54687.5	97656.2
	Communication		17211.9	11718.8	28320.3	10742.2	17578.1	8789.06	5859.38	13671.9	11718.8	6835.94	26367.2	46875	53710.9	10742.2	41015.6	53710.9	50781.2	8789.06	12207	13671.9	44921.9	66406.2	7324.22	7812.5	39062.5	9765.62	10986.3	9765.62	40039.1	7324.22	10253.9	46875	13671.9	11718.8	41015.6	11108.4	5859.38	7812.5	31250	9277.34	6835.94	38085.9	6347.66	45898.4	48706.1	58593.8	7812.5
[truncated: 687 more columns]

## Sheet: Fig. 1f
BandPower	bool_idxsecho	freq_band	channel					Frequency bands					ch: 1-16 FAF; 16-32 AC
-88.1097	0	1	1					1. delta
-48.8984	1	1	1					4. beta1
-80.3425	1	1	1					7. gamma2
-82.3694	1	1	1
-85.9677	0	1	1
-80.1643	0	1	1
-68.2443	0	1	1
-67.471	1	1	1
-57.106	0	1	1
-81.5845	1	1	1
-78.1664	0	1	1
-67.0732	0	1	1
-84.1484	0	1	1
-93.027	0	1	1
652.763	1	1	1
1509.96	1	1	1
1057.8	1	1	1
1476.22	0	1	1
1303.05	0	1	1
1450.31	0	1	1
831.436	0	1	1
1633.66	0	1	1
700.923	1	1	1
797.828	1	1	1
912.24	0	1	1
968.423	0	1	1
824.345	0	1	1
1128.97	0	1	1
1622.65	0	1	1
1190.01	1	1	1
773.356	0	1	1
672.34	0	1	1
318.255	0	1	1
381.486	0	1	1
541.418	0	1	1
1002.87	1	1	1
435.408	0	1	1
760.241	0	1	1
1146.48	0	1	1
469.549	1	1	1
1527.03	0	1	1
1322.67	0	1	1
211.028	0	1	1
984.166	0	1	1
113.637	0	1	1
224.867	1	1	1
1054.63	0	1	1
1281.58	0	1	1
1274.26	0	1	1
331.356	0	1	1
386.505	1	1	1
26.1487	0	1	1
0.631937	0	1	1
144.879	0	1	1
-46.0559	0	1	1
84.1034	0	1	1
-23.3483	0	1	1
1246.1	0	1	1
49.4088	1	1	1
203.73	0	1	1
288.161	0	1	1
-10.801	0	1	1
34.9037	0	1	1
-19.0339	0	1	1
77.3445	0	1	1
-71.8914	0	1	1
260.445	0	1	1
-67.8324	0	1	1
20.905	0	1	1
8.58699	0	1	1
-6.59325	0	1	1
38.6358	0	1	1
26.8846	0	1	1
154.968	0	1	1
-20.1433	0	1	1
-35.8136	0	1	1
-51.889	0	1	1
13.4963	0	1	1
-53.3866	0	1	1
-39.6342	0	1	1
-66.3994	0	1	1
-50.0964	0	1	1
-63.8081	0	1	1
-40.6749	0	1	1
-88.6858	0	1	1
-89.1195	0	1	1
-63.9359	0	1	1
-89.8592	0	1	1
24.8948	0	1	1
7974.61	0	1	1
-32.0303	0	1	1
-8.3566	0	1	1
109.066	0	1	1
175.777	0	1	1
257.436	0	1	1
-19.256	0	1	1
1433.93	0	1	1
4176.5	0	1	1
-85.2765	0	1	1
405.201	0	1	1
4760.37	0	1	1
291.23	0	1	1
-19.4861	0	1	1
-77.2048	0	1	1
-75.4416	0	1	1
-80.9605	0	1	1
-71.167	1	1	1
91.9938	0	1	1
-39.2709	0	1	1
1115.64	0	1	1
-96.079	1	1	1
26.2243	0	1	1
427.974	0	1	1
-99.9837	0	1	1
-98.5972	0	1	1
-99.9996	0	1	1
-99.9995	0	1	1
768.343	1	1	1
748.788	0	1	1
2598.05	1	1	1
917.884	0	1	1
873.257	1	1	1
1422.29	0	1	1
414.884	0	1	1
916.101	0	1	1
1170.96	0	1	1
722.558	1	1	1
1274.06	0	1	1
961.69	0	1	1
854.578	1	1	1
556.176	1	1	1
774.673	0	1	1
1102.87	0	1	1
218.266	0	1	1
384.194	0	1	1
241.609	0	1	1
344.747	0	1	1
333.242	0	1	1
186.744	0	1	1
614.127	0	1	1
175.484	0	1	1
244.269	1	1	1
587.312	0	1	1
515.938	1	1	1
226.269	0	1	1
449.384	0	1	1
93.9215	0	1	1
389.742	0	1	1
415.093	0	1	1
276.095	1	1	1
484.171	0	1	1
72.7544	0	1	1
259.83	0	1	1
1575.26	0	1	1
971.09	0	1	1
1114.73	0	1	1
84.8853	0	1	1
10.8318	0	1	1
7.92851	0	1	1
136.703	0	1	1
2443.29	0	1	1
442.236	0	1	1
0.185398	0	1	1
557.525	0	1	1
-28.0084	0	1	1
31.5485	0	1	1
-39.5842	0	1	1
55.1568	0	1	1
-2.93065	1	1	1
173.08	0	1	1
-29.2214	0	1	1
32.9874	0	1	1
1367.95	0	1	1
1954.49	0	1	1
2461.48	0	1	1
957.037	0	1	1
1012	1	1	1
2186.24	0	1	1
2563.57	0	1	1
1585.1	0	1	1
1169.25	0	1	1
1364.69	1	1	1
2578.69	0	1	1
1615.47	0	1	1
1740.26	1	1	1
1620.11	0	1	1
2285.25	0	1	1
2265.74	0	1	1
3858.67	0	1	1
3274.02	0	1	1
377.112	0	1	1
1415.1	0	1	1
3106.46	0	1	1
816.751	0	1	1
529.716	1	1	1
1032.93	0	1	1
1067.88	0	1	1
406.338	0	1	1
498.513	0	1	1
1726.45	0	1	1
1023.54	0	1	1
388.448	1	1	1
1672.09	1	1	1
1566.69	1	1	1
555.34	0	1	1
887.659	0	1	1
15282.6	0	1	1
799.412	0	1	1
457.188	1	1	1
2703.7	1	1	1
1644.93	1	1	1
848.711	1	1	1
159.062	1	1	1
422.696	0	1	1
224.98	1	1	1
387.528	0	1	1
95.3816	0	1	1
30.7976	1	1	1
319.774	0	1	1
546.786	1	1	1
564.664	0	1	1
982.382	1	1	1
918.382	0	1	1
236.167	0	1	1
333.392	0	1	1
516.453	0	1	1
900.018	1	1	1
623.605	0	1	1
-28.6977	0	1	1
-92.8538	0	1	1
-79.7059	0	1	1
-83.0802	0	1	1
-57.9405	0	1	1
-34.6345	0	1	1
-68.5743	0	1	1
-29.2348	0	1	1
-41.177	0	1	1
-6.74344	0	1	1
-56.4822	0	1	1
-70.2444	0	1	1
-56.845	0	1	1
-23.1216	0	1	1
-4.15193	0	1	1
-77.0122	0	1	1
-9.99721	0	1	1
85.3942	0	1	1
-56.2801	0	1	1
160.804	0	1	1
38.3211	0	1	1
14.7951	0	1	1
-5.89849	0	1	1
81.8079	0	1	1
90.9011	0	1	1
74.987	0	1	1
-58.9361	0	1	1
-15.0861	0	1	1
58.752	0	1	1
7.62713	0	1	1
-78.9506	0	1	1
2.11383	0	1	1
-34.3215	0	1	1
-19.6324	1	1	1
-45.9946	0	1	1
-79.1492	0	1	1
-33.3748	0	1	1
-36.8302	0	1	1
-62.0798	0	1	1
-29.5827	0	1	1
-70.5925	0	1	1
12.0977	0	1	1
-27.5689	0	1	1
-74.4469	0	1	1
-28.1249	0	1	1
-57.6775	0	1	1
-34.9633	1	1	1
-58.0822	0	1	1
33.3911	0	1	1
-50.5182	0	1	1
-55.5112	0	1	1
-53.2945	0	1	1
-63.7542	0	1	1
-32.3983	0	1	1
-55.2126	0	1	1
-53.7569	0	1	1
-35.0253	0	1	1
-16.6112	0	1	1
-78.8093	0	1	1
-58.9231	0	1	1
-12.3499	0	1	1
-55.7496	0	1	1
-68.6989	0	1	1
-48.2212	0	1	1
-68.3488	0	1	1
-57.5904	0	1	1
-41.6176	0	1	1
-51.8783	0	1	1
-83.1819	0	1	1
-63.227	0	1	1
-35.181	0	1	1
-38.5983	0	1	1
-64.1677	0	1	1
-27.3424	0	1	1
-63.3928	0	1	1
-59.0452	0	1	1
-34.6195	0	1	1
-60.965	0	1	1
-67.2686	0	1	1
-53.8967	0	1	1
-57.9224	0	1	1
1721.3	0	1	1
255.036	0	1	1
97.5186	0	1	1
149.772	0	1	1
208.014	0	1	1
-9.9457	0	1	1
189.903	0	1	1
286.879	0	1	1
240.069	1	1	1
205.883	0	1	1
188.263	0	1	1
473.599	0	1	1
147.012	0	1	1
431.765	0	1	1
210.208	0	1	1
-24.4284	0	1	1
-30.3247	0	1	1
-7.82585	0	1	1
171.216	0	1	1
-19.0702	1	1	1
3150.28	0	1	1
131.894	0	1	1
5.55302	0	1	1
202.784	0	1	1
181.527	0	1	1
323.632	0	1	1
103.699	0	1	1
131.733	0	1	1
62.9559	0	1	1
-99.9998	0	1	1
-99.9998	0	1	1
-99.9997	0	1	1
-99.9999	0	1	1
-99.9996	0	1	1
-99.9986	0	1	1
-99.9996	0	1	1
-99.9995	0	1	1
-99.9998	1	1	1
-99.9998	0	1	1
-99.9998	1	1	1
-99.9996	1	1	1
-30.5489	0	1	1
19.4556	0	1	1
-8.25021	0	1	1
-53.2996	1	1	1
-20.0413	0	1	1
14.1772	0	1	1
54.0652	0	1	1
139.08	0	1	1
28.2334	0	1	1
85.5534	0	1	1
76.0096	0	1	1
21.1799	0	1	1
104.121	1	1	1
6.53651	0	1	1
487.678	0	1	1
-12.2752	0	1	1
5.66821	0	1	1
16.9585	0	1	1
65.7371	0	1	1
79.051	0	1	1
-50.575	0	1	1
103.164	0	1	1
-39.2124	0	1	1
82.8614	0	1	1
-5.88641	0	1	1
62.4377	0	1	1
103.028	0	1	1
-38.195	0	1	1
116.459	0	1	1
1.15324	0	1	1
42.3291	1	1	1
27.3882	0	1	1
-19.6229	0	1	1
-27.7881	0	1	1
71.5374	1	1	1
17.4995	1	1	1
189.476	0	1	1
126.503	0	1	1
53.8431	0	1	1
27.8693	0	1	1
114.975	0	1	1
124.525	1	1	1
35.1813	0	1	1
27.337	0	1	1
23.774	0	1	1
165.87	0	1	1
4.91529	1	1	1
29.8896	0	1	1
-30.2476	0	1	1
34.4571	0	1	1
16.3056	0	1	1
15.65	0	1	1
56.3158	0	1	1
9.2203	0	1	1
-35.2868	0	1	1
-84.8959	0	1	1
27.1649	1	1	1
45.5787	0	1	1
-45.9751	0	1	1
-46.0853	0	1	1
10.5416	0	1	1
-67.348	0	1	1
0.0397886	0	1	1
-13.4615	0	1	1
-80.9553	0	1	1
-37.4261	0	1	1
-44.1163	0	1	1
21.9392	0	1	1
-4.15104	0	1	1
-6.1249	1	1	1
-80.7301	1	1	1
-18.1664	1	1	1
-73.9889	0	1	1
-12.7378	0	1	1
76.0515	0	1	1
-52.9108	0	1	1
-32.6212	0	1	1
-45.3009	0	1	1
-60.1112	0	1	1
-45.777	0	1	1
-41.4614	0	1	1
-40.9011	0	1	1
-46.4778	0	1	1
-51.0932	0	1	1
-40.3353	0	1	1
-82.135	0	1	1
-42.8927	1	1	1
-14.2653	0	1	1
-47.1035	0	1	1
-12.8408	0	1	1
99.9728	0	1	1
-59.7722	0	1	1
4.92072	0	1	1
-35.0575	0	1	1
596.639	0	1	1
-47.5469	0	1	1
-25.4366	0	1	1
564.32	0	1	1
368.411	0	1	1
-45.0566	0	1	1
-52.9022	0	1	1
-15.2887	0	1	1
-78.3924	0	1	1
44.2226	0	1	1
-26.0074	0	1	1
171.401	0	1	1
701.851	0	1	1
308.571	0	1	1
135.249	0	1	1
67.233	0	1	1
-15.5825	0	1	1
132.781	0	1	1
78.5447	0	1	1
528.177	0	1	1
-40.082	0	1	1
-22.316	0	1	1
574.928	0	1	1
-19.7882	0	1	1
194.901	0	1	1
13.7073	0	1	1
33.7388	0	1	1
522.26	0	1	1
462.901	0	1	1
270.462	0	1	1
27.1424	0	1	1
39.4214	0	1	1
242.534	0	1	1
366.264	0	1	1
1444.19	0	1	1
419.609	0	1	1
1219.8	0	1	1
237.106	0	1	1
1383.23	0	1	1
2325.58	1	1	1
4493.12	0	1	1
1012.18	0	1	1
785.076	0	1	1
161.154	0	1	1
1297.36	1	1	1
1320.25	0	1	1
696.905	0	1	1
1607.36	0	1	1
1235.63	0	1	1
1086.89	0	1	1
911.297	0	1	1
690.11	0	1	1
962.531	0	1	1
722.582	0	1	1
63.4045	1	1	1
-11.911	0	1	1
582.436	0	1	1
1611.35	1	1	1
1904.36	0	1	1
149.94	0	1	1
546.823	0	1	1
1974.84	0	1	1
1731.01	0	1	1
634.156	1	1	1
789.826	0	1	1
338.306	0	1	1
359.507	0	1	1
448.544	0	1	1
731.446	0	1	1
347.108	1	1	1
374.36	0	1	1
345.417	0	1	1
657.975	1	1	1
-64.1328	0	1	1
241.328	0	1	1
288.509	0	1	1
134.195	0	1	1
800.965	1	1	1
555.13	0	1	1
1014.37	0	1	1
502.191	0	1	1
311.976	0	1	1
38.6569	0	1	1
251.402	0	1	1
922.244	1	1	1
333.396	0	1	1
675.788	0	1	1
808.034	0	1	1
-44.5217	0	1	1
-35.1447	1	1	1
-78.6609	0	1	1
-81.6162	0	1	1
-20.3139	0	1	1
-48.6476	0	1	1
4.22672	0	1	1
-69.241	0	1	1
-66.3488	0	1	1
-59.0367	0	1	1
40.2824	0	1	1
4.08958	0	1	1
-21.3023	0	1	1
-64.7176	0	1	1
-16.3461	0	1	1
62.4325	0	1	1
8.00156	0	1	1
43.6111	0	1	1
-69.1836	0	1	1
-30.4944	0	1	1
-9.18162	0	1	1
-59.6149	0	1	1
-65.4966	0	1	1
-65.2899	0	1	1
258.729	0	1	1
-3.2377	0	1	1
-60.4885	0	1	1
-64.151	0	1	1
-48.633	0	1	1
109.261	0	1	1
-13.2605	0	1	1
72.2349	0	1	1
175.434	0	1	1
-85.8117	1	1	1
6.50788	0	1	1
155.661	1	1	1
245.711	1	1	1
-26.2749	1	1	1
195.489	1	1	1
161.967	1	1	1
73.8729	0	1	1
118.339	0	1	1
133.898	1	1	1
-66.4944	0	1	1
115.19	0	1	1
35.5209	0	1	1
71.5144	1	1	1
167.476	0	1	1
-10.092	1	1	1
49.8513	1	1	1
41.1227	1	1	1
-48.7799	0	1	1
28.4788	1	1	1
25.7315	1	1	1
10.1221	1	1	1
15.3653	1	1	1
10.9246	1	1	1
138.175	1	1	1
36.9809	1	1	1
-54.4928	0	1	1
-7.47855	0	1	1
-50.5205	0	1	1
-9.43551	1	1	1
59.7655	1	1	1
81.9955	1	1	1
29.076	0	1	1
113.633	1	1	1
-9.82176	0	1	1
402.01	0	1	1
309.171	0	1	1
-34.4738	0	1	1
235.269	1	1	1
94.1382	0	1	1
290.128	1	1	1
397.057	0	1	1
190.484	0	1	1
1165.15	1	1	1
205.875	0	1	1
184.119	1	1	1
139.694	1	1	1
93.2986	1	1	1
-25.3987	0	1	1
104.108	1	1	1
336.248	1	1	1
96.6196	1	1	1
56.2284	1	1	1
114.376	1	1	1
69.8875	1	1	1
82.349	1	1	1
103.714	1	1	1
-64.7299	0	1	1
224.578	0	1	1
181.982	0	1	1
31.5175	1	1	1
156.627	0	1	1
172.631	0	1	1
100.273	0	1	1
82.9592	1	1	1
373.905	0	1	1
-11.0712	0	1	1
6.83705	1	1	1
-87.7944	0	1	1
-70.0658	0	1	1
-66.028	0	1	1
-93.6762	0	1	1
-73.45	0	1	1
-81.0795	0	1	1
-67.429	0	1	1
-89.9241	0	1	1
-75.6569	0	1	1
-67.9174	0	1	1
-62.7947	1	1	1
-51.3125	0	1	1
-66.4041	0	1	1
-29.3808	0	1	1
9.67698	0	1	1
-64.6638	0	1	1
-58.2005	1	1	1
-95.3945	0	1	1
-54.3656	0	1	1
-59.5539	0	1	1
-27.4751	1	1	1
-95.5182	0	1	1
13.3683	0	1	1
-68.2237	0	1	1
-77.7466	0	1	1
-96.3067	0	1	1
-95.2248	0	1	1
-63.4288	0	1	1
-65.0839	0	1	1
-25.9662	0	1	1
-24.4267	0	1	1
-54.603	0	1	1
-17.8453	0	1	1
7.59885	0	1	1
-47.0219	0	1	1
-27.121	0	1	1
33.6329	0	1	1
74.9604	0	1	1
-38.8748	0	1	1
-14.1606	0	1	1
-5.05491	0	1	1
-28.4203	0	1	1
-29.3449	0	1	1
3.61264	0	1	1
107.42	0	1	1
-24.1064	0	1	1
827.855	0	1	1
1263.12	0	1	1
1229.13	0	1	1
718.71	0	1	1
247.329	0	1	1
491.495	0	1	1
717.974	1	1	1
299.9	0	1	1
-70.297	0	1	1
11.0377	0	1	1
-61.4973	0	1	1
-44.6095	0	1	1
-65.2061	0	1	1
283.131	0	1	1
-50.8535	0	1	1
-47.3773	0	1	1
-36.1991	0	1	1
-30.9115	0	1	1
302.162	0	1	1
-42.5546	0	1	1
-56.6613	0	1	1
-52.3889	0	1	1
74.6166	0	1	1
-76.3556	0	1	1
448.666	0	1	1
-78.6737	0	1	1
252.609	0	1	1
-66.0758	0	1	1
-49.2544	0	1	1
18.9474	0	1	1
128.838	0	1	1
-34.6882	0	1	1
-61.1174	0	1	1
-2.25527	0	1	1
9.3654	0	1	1
40.9433	0	1	1
87.7268	0	1	1
1.47779	0	1	1
74.7689	0	1	1
35.8561	0	1	1
-31.6525	0	1	1
97.1859	0	1	1
-73.5358	0	1	1
89.6595	0	1	1
-27.8173	0	1	1
37.8783	0	1	1
-41.7554	0	1	1
20.0189	0	1	1
-24.4202	0	1	1
1.68546	0	1	1
114.313	0	1	1
233.643	0	1	1
13.9789	0	1	1
-28.4567	0	1	1
66.898	0	1	1
-46.803	0	1	1
1.31637	1	1	1
-1.68426	0	1	1
37.848	0	1	1
251.923	0	1	1
47.0219	0	1	1
91.874	0	1	1
182.777	0	1	1
70.0382	0	1	1
80.9886	0	1	1
-24.9776	0	1	1
-49.2967	0	1	1
38.4887	0	1	1
27.078	0	1	1
61.8838	0	1	1
153.401	1	1	1
32.7075	0	1	1
24.7154	0	1	1
20.8619	0	1	1
-13.7754	0	1	1
127.61	0	1	1
-8.96996	0	1	1
-11.2254	0	1	1
-71.5048	0	1	1
-70.6098	0	1	1
-77.4535	0	1	1
-63.2488	0	1	1
-80.7171	0	1	1
-66.9037	0	1	1
-82.5991	0	1	1
-63.2918	0	1	1
-60.3914	0	1	1
-87.503	0	1	1
-71.0504	1	1	1
-87.6322	0	1	1
-71.9433	1	1	1
-84.8422	0	1	1
-59.0811	0	1	1
-57.8623	1	1	1
-38.8158	0	1	1
-63.5639	0	1	1
-82.0904	0	1	1
-66.4614	0	1	1
-62.9329	0	1	1
-73.6513	0	1	1
-93.7664	0	1	1
-87.4199	0	1	1
-79.1789	0	1	1
-59.6313	0	1	1
-69.3871	0	1	1
-64.8556	0	1	1
-64.3953	0	1	1
-71.3307	0	1	1
-73.9333	0	1	1
-74.2152	1	1	1
-77.2883	0	1	1
-68.6884	1	1	1
-81.9936	1	1	1
-80.4022	0	1	1
-68.3272	0	1	1
-70.9903	0	1	1
-63.4301	0	1	1
-84.8787	0	1	1
-59.4425	0	1	1
-75.5765	0	1	1
-61.9434	0	1	1
-75.0576	0	1	1
-77.1544	0	1	1
-36.0274	0	1	1
-85.1617	0	1	1
-63.8097	1	1	1
-76.2031	0	1	1
-68.5286	0	1	1
157.489	0	1	1
27.9667	0	1	1
8.85497	0	1	1
240.851	0	1	1
99.5528	0	1	1
148.226	0	1	1
147.42	0	1	1
434.601	0	1	1
142.761	0	1	1
474.409	0	1	1
249.299	0	1	1
136.568	0	1	1
34.6803	0	1	1
260.812	0	1	1
258.833	0	1	1
2541.93	0	1	1
590.54	0	1	1
1967.74	0	1	1
582.271	0	1	1
231.494	0	1	1
861.087	0	1	1
717.37	0	1	1
275.827	0	1	1
34.2278	0	1	1
668.783	0	1	1
438.111	0	1	1
591.756	0	1	1
129.848	0	1	1
50.8458	0	1	1
325.711	0	1	1
102.024	1	1	1
865.789	0	1	1
-7.29051	1	1	1
1417.19	0	1	1
557.163	0	1	1
901.756	0	1	1
735.145	0	1	1
772.533	0	1	1
212.281	0	1	1
187.269	0	1	1
550.653	0	1	1
1881.18	0	1	1
1015.09	1	1	1
473.144	0	1	1
831.132	1	1	1
288.803	1	1	1
817.288	0	1	1
805.895	0	1	1
484.334	0	1	1
681.39	0	1	1
247.657	1	1	1
384.17	0	1	1
713.041	0	1	1
15.351	1	1	1
-45.2524	1	1	1
70.6146	0	1	1
671.5	0	1	1
136.211	0	1	1
239.507	1	1	1
1117.94	0	1	1
212.418	0	1	1
-8.04568	1	1	1
150.266	1	1	1
332.227	1	1	1
112.644	0	1	1
-86.0833	0	1	2
-59.9986	1	1	2
-80.2384	1	1	2
-90.1263	1	1	2
-79.8778	0	1	2
-69.6256	0	1	2
-50.0541	0	1	2
-61.1162	1	1	2
-46.5448	0	1	2
-77.36	1	1	2
-83.745	0	1	2
-75.7897	0	1	2
-85.887	0	1	2
-93.24	0	1	2
554.008	1	1	2
1290.11	1	1	2
1043.75	1	1	2
1290.31	0	1	2
1073.78	0	1	2
1299.19	0	1	2
694.833	0	1	2
1442.92	0	1	2
412.029	1	1	2
492.786	1	1	2
557.529	0	1	2
549.212	0	1	2
542.935	0	1	2
715.147	0	1	2
287.54	0	1	2
768.702	1	1	2
536.975	0	1	2
464.772	0	1	2
221.737	0	1	2
250.568	0	1	2
381.405	0	1	2
748.532	1	1	2
285.116	0	1	2
535.042	0	1	2
796.837	0	1	2
313.049	1	1	2
1097.53	0	1	2
952.401	0	1	2
106.115	0	1	2
732.665	0	1	2
54.1972	0	1	2
149.304	1	1	2
760.391	0	1	2
935.125	0	1	2
940.677	0	1	2
230.795	0	1	2
265.079	1	1	2
-13.2571	0	1	2
-14.5786	0	1	2
-54.3485	0	1	2
-78.0353	0	1	2
93.9599	0	1	2
-81.0989	0	1	2
-72.2782	0	1	2
-70.3605	1	1	2
-47.9477	0	1	2
233.926	0	1	2
-32.1869	0	1	2
21.6082	0	1	2
334.09	0	1	2
78.847	0	1	2
1.12353	0	1	2
236.366	0	1	2
84.3073	0	1	2
238.455	0	1	2
421.122	0	1	2
285.566	0	1	2
67.8672	0	1	2
-28.2913	0	1	2
182.704	0	1	2
-50.2665	0	1	2
-48.9732	0	1	2
-55.8815	0	1	2
10.9239	0	1	2
-52.4861	0	1	2
-40.0254	0	1	2
-64.8066	0	1	2
-44.4478	0	1	2
-60.5206	0	1	2
-38.663	0	1	2
-85.8353	0	1	2
-85.8838	0	1	2
-54.5739	0	1	2
-84.9612	0	1	2
1202.6	0	1	2
3971.65	0	1	2
620.211	0	1	2
759.849	0	1	2
1688.43	0	1	2
977.68	0	1	2
1103.14	0	1	2
746.741	0	1	2
18751	0	1	2
14640.4	0	1	2
358.112	0	1	2
1625.31	0	1	2
11125	0	1	2
3920.95	0	1	2
1016.91	0	1	2
283.149	0	1	2
233.965	0	1	2
170.247	0	1	2
197.721	1	1	2
896.083	0	1	2
369.721	0	1	2
1752.69	0	1	2
293.575	1	1	2
783.626	0	1	2
3033.35	0	1	2
203.491	0	1	2
562.678	0	1	2
1349.58	0	1	2
261.528	0	1	2
666.121	1	1	2
641.081	0	1	2
2295.39	1	1	2
795.95	0	1	2
759.796	1	1	2
1219.35	0	1	2
329.874	0	1	2
771.249	0	1	2
1036.35	0	1	2
598.181	1	1	2
1057.81	0	1	2
809.865	0	1	2
708.441	1	1	2
439.063	1	1	2
638.715	0	1	2
891.467	0	1	2
162.498	0	1	2
297.924	0	1	2
179.122	0	1	2
266.093	0	1	2
275.733	0	1	2
144.424	0	1	2
513.535	0	1	2
126.032	0	1	2
193.281	1	1	2
487.624	0	1	2
428.559	1	1	2
168.688	0	1	2
362.07	0	1	2
68.4548	0	1	2
309.479	0	1	2
335.887	0	1	2
214.591	1	1	2
382.501	0	1	2
4.80351	0	1	2
134.819	0	1	2
1187.77	0	1	2
693.392	0	1	2
814.923	0	1	2
37.0188	0	1	2
-13.1086	0	1	2
-19.3958	0	1	2
72.7648	0	1	2
1899.76	0	1	2
341.25	0	1	2
-18.8741	0	1	2
423.178	0	1	2
-0.775257	0	1	2
95.5551	0	1	2
-13.121	0	1	2
84.4763	0	1	2
22.1067	1	1	2
281.286	0	1	2
-8.01853	0	1	2
92.2464	0	1	2
1475.95	0	1	2
2057.29	0	1	2
2531.75	0	1	2
949.868	0	1	2
786.139	1	1	2
1493.98	0	1	2
1914.74	0	1	2
1767.77	0	1	2
1235.52	0	1	2
1459.1	1	1	2
1590.52	0	1	2
1689.26	0	1	2
1837.73	1	1	2
1452.63	0	1	2
2331.15	0	1	2
2252.02	0	1	2
2640.63	0	1	2
2102.4	0	1	2
347.3	0	1	2
1508.74	0	1	2
3277.56	0	1	2
1210.32	0	1	2
863.116	1	1	2
1518	0	1	2
1707.21	0	1	2
686.133	0	1	2
813.85	0	1	2
2745.97	0	1	2
951.953	0	1	2
373.224	1	1	2
1578.47	1	1	2
1528.24	1	1	2
504.125	0	1	2
754.427	0	1	2
5031.05	0	1	2
737.425	0	1	2
400.427	1	1	2
2861.88	1	1	2
1633.74	1	1	2
1264.52	1	1	2
133.265	1	1	2
511.962	0	1	2
221.593	1	1	2
325.459	0	1	2
60.557	0	1	2
17.3823	1	1	2
276.966	0	1	2
477.647	1	1	2
478.776	0	1	2
1015.75	1	1	2
364.602	0	1	2
166.194	0	1	2
287.188	0	1	2
415.446	0	1	2
791.017	1	1	2
455.835	0	1	2
15.8481	0	1	2
-87.727	0	1	2
-65.9124	0	1	2
-67.93	0	1	2
-28.1368	0	1	2
15.3111	0	1	2
-45.5044	0	1	2
39.4904	0	1	2
15.7938	0	1	2
98.0863	0	1	2
-10.6218	0	1	2
-39.8562	0	1	2
-12.7715	0	1	2
24.3772	0	1	2
59.213	0	1	2
-60.2389	0	1	2
52.849	0	1	2
223.775	0	1	2
-20.7126	0	1	2
365.266	0	1	2
109.714	0	1	2
78.1326	0	1	2
52.2955	0	1	2
184.899	0	1	2
199.024	0	1	2
178.982	0	1	2
-38.7596	0	1	2
28.2278	0	1	2
121.505	0	1	2
71.34	0	1	2
-72.7032	0	1	2
35.5344	0	1	2
-26.1591	0	1	2
12.9723	1	1	2
-31.1074	0	1	2
-70.1988	0	1	2
83.1188	0	1	2
36.9713	0	1	2
-21.569	0	1	2
41.5168	0	1	2
-46.7007	0	1	2
121.384	0	1	2
41.8684	0	1	2
-49.9281	0	1	2
40.6154	0	1	2
-15.1161	0	1	2
27.887	1	1	2
-17.2437	0	1	2
182.077	0	1	2
2.3005	0	1	2
-5.65054	0	1	2
-2.61682	0	1	2
-22.7219	0	1	2
51.2948	0	1	2
-3.69402	0	1	2
-7.78414	0	1	2
33.732	0	1	2
70.8	0	1	2
-58.0469	0	1	2
-8.03204	0	1	2
74.338	0	1	2
-12.7638	0	1	2
-36.3715	0	1	2
6.59613	0	1	2
-30.8528	0	1	2
-18.3256	0	1	2
23.2284	0	1	2
7.98308	0	1	2
-65.2579	0	1	2
-10.2774	0	1	2
64.9558	0	1	2
20.389	0	1	2
-12.3756	0	1	2
94.2012	0	1	2
-32.2486	0	1	2
-14.6265	0	1	2
-8.38235	0	1	2
-9.26649	0	1	2
-35.9435	0	1	2
-6.59332	0	1	2
-13.414	0	1	2
2116.68	0	1	2
295.82	0	1	2
129.055	0	1	2
185.667	0	1	2
262.379	0	1	2
4.333	0	1	2
232.653	0	1	2
366.733	0	1	2
300.733	1	1	2
276.588	0	1	2
230.437	0	1	2
554.262	0	1	2
185.272	0	1	2
527.86	0	1	2
291.837	0	1	2
4.75064	0	1	2
-15.0565	0	1	2
29.7424	0	1	2
317.633	0	1	2
28.7827	1	1	2
208.706	0	1	2
228.439	0	1	2
51.9209	0	1	2
282.965	0	1	2
296.566	0	1	2
501.592	0	1	2
203.536	0	1	2
216.239	0	1	2
219.236	0	1	2
369.019	0	1	2
63.6177	0	1	2
871.962	0	1	2
1669.49	0	1	2
734.433	0	1	2
482.391	0	1	2
1253.28	0	1	2
-45.2664	0	1	2
589.214	1	1	2
748.115	0	1	2
988.922	1	1	2
-55.8988	1	1	2
0.12985	0	1	2
37.8679	0	1	2
3.97352	0	1	2
-37.3565	1	1	2
-3.47831	0	1	2
54.0496	0	1	2
80.9087	0	1	2
177.892	0	1	2
47.7243	0	1	2
106.369	0	1	2
109.176	0	1	2
39.2089	0	1	2
140.876	1	1	2
22.6823	0	1	2
521.295	0	1	2
-1.79737	0	1	2
28.4098	0	1	2
41.9685	0	1	2
103.353	0	1	2
116.097	0	1	2
-25.9691	0	1	2
152.506	0	1	2
-17.3497	0	1	2
120.802	0	1	2
-1.54361	0	1	2
112.184	0	1	2
139.804	0	1	2
-25.6661	0	1	2
143.441	0	1	2
28.6154	0	1	2
46.2463	1	1	2
-40.8239	0	1	2
-8.89768	0	1	2
-21.2839	0	1	2
112.159	1	1	2
29.5883	1	1	2
203.665	0	1	2
102.973	0	1	2
111.829	0	1	2
17.5191	0	1	2
146.624	0	1	2
100.295	1	1	2
57.1089	0	1	2
37.9006	0	1	2
42.7973	0	1	2
241.213	0	1	2
-12.118	1	1	2
37.4462	0	1	2
3.77831	0	1	2
49.9627	0	1	2
-30.8057	0	1	2
14.4865	0	1	2
94.4916	0	1	2
18.5698	0	1	2
-37.2406	0	1	2
-76.8604	0	1	2
13.5361	1	1	2
11.4885	0	1	2
-35.8959	0	1	2
-28.0151	0	1	2
-9.74963	0	1	2
-61.5967	0	1	2
12.8379	0	1	2
16.9376	0	1	2
-73.4354	0	1	2
-39.4264	0	1	2
-39.4972	0	1	2
20.3081	0	1	2
44.3066	0	1	2
-16.6273	1	1	2
-77.0275	1	1	2
-29.5257	1	1	2
-58.2268	0	1	2
12.1731	0	1	2
132.166	0	1	2
-55.864	0	1	2
-36.0308	0	1	2
-41.8944	0	1	2
-38.3235	0	1	2
-37.0783	0	1	2
-24.2245	0	1	2
-20.2592	0	1	2
125.246	0	1	2
-52.6088	0	1	2
-30.4381	0	1	2
-74.2767	0	1	2
-18.5325	1	1	2
4.38949	0	1	2
-29.5597	0	1	2
38.6137	0	1	2
184.998	0	1	2
-58.7657	0	1	2
2.08631	0	1	2
-44.8788	0	1	2
72.384	0	1	2
-47.9257	0	1	2
-18.4548	0	1	2
-60.911	0	1	2
-59.0388	0	1	2
-15.5257	0	1	2
-32.1631	0	1	2
28.3795	0	1	2
-77.2591	0	1	2
-18.104	0	1	2
-23.0992	0	1	2
291.235	0	1	2
1062.16	0	1	2
485.218	0	1	2
233.054	0	1	2
131.139	0	1	2
13.9108	0	1	2
228.682	0	1	2
151.217	0	1	2
777.054	0	1	2
-18.539	0	1	2
3.10786	0	1	2
843.984	0	1	2
7.62099	0	1	2
316.896	0	1	2
73.6075	0	1	2
80.5081	0	1	2
690.147	0	1	2
619.365	0	1	2
374.127	0	1	2
60.1682	0	1	2
86.423	0	1	2
356.81	0	1	2
468.885	0	1	2
1861.51	0	1	2
551.912	0	1	2
1646.34	0	1	2
316.255	0	1	2
1129.43	0	1	2
1985.09	1	1	2
1100.82	0	1	2
814.98	0	1	2
608.478	0	1	2
116.335	0	1	2
1044.16	1	1	2
1060.58	0	1	2
551.297	0	1	2
1348.47	0	1	2
1011.25	0	1	2
882.143	0	1	2
728.943	0	1	2
542.064	0	1	2
677.86	0	1	2
562.332	0	1	2
17.5255	1	1	2
-38.8707	0	1	2
491.316	0	1	2
1276.03	1	1	2
1487.62	0	1	2
84.1986	0	1	2
405.916	0	1	2
1451.19	0	1	2
1386.2	0	1	2
619.006	1	1	2
769.493	0	1	2
395.596	0	1	2
326.39	0	1	2
413.674	0	1	2
709.304	0	1	2
330.205	1	1	2
353.625	0	1	2
316.198	0	1	2
651.298	1	1	2
-65.7789	0	1	2
221.866	0	1	2
279.752	0	1	2
109.225	0	1	2
717.463	1	1	2
502.909	0	1	2
922.359	0	1	2
454.678	0	1	2
279.999	0	1	2
24.3195	0	1	2
227.818	0	1	2
848.943	1	1	2
309.132	0	1	2
606.894	0	1	2
745.392	0	1	2
-11.6299	0	1	2
2.59533	1	1	2
-64.4566	0	1	2
-72.2379	0	1	2
29.0482	0	1	2
-16.1268	0	1	2
66.1361	0	1	2
-48.9958	0	1	2
-40.9985	0	1	2
-52.1838	0	1	2
55.741	0	1	2
11.5216	0	1	2
-11.8264	0	1	2
-60.1324	0	1	2
-2.09802	0	1	2
87.346	0	1	2
22.6671	0	1	2
71.0678	0	1	2
-64.8149	0	1	2
-18.9731	0	1	2
4.69986	0	1	2
-53.1474	0	1	2
-59.7141	0	1	2
-58.4468	0	1	2
314.679	0	1	2
9.62425	0	1	2
-54.763	0	1	2
-60.5436	0	1	2
-43.5069	0	1	2
131.234	0	1	2
-2.86288	0	1	2
74.8826	0	1	2
134.491	0	1	2
-92.5314	1	1	2
9.31613	0	1	2
152.635	1	1	2
234.937	1	1	2
-28.6633	1	1	2
195.824	1	1	2
134.126	1	1	2
5.7866	0	1	2
106.347	0	1	2
139.809	1	1	2
-69.882	0	1	2
105.418	0	1	2
35.2731	0	1	2
60.878	1	1	2
145.15	0	1	2
-23.7805	1	1	2
17.2028	1	1	2
22.1516	1	1	2
-59.5646	0	1	2
13.9941	1	1	2
9.74733	1	1	2
-8.00402	1	1	2
4.91851	1	1	2
-2.14489	1	1	2
-7.29632	1	1	2
26.1704	1	1	2
-38.3156	0	1	2
-17.25	0	1	2
-55.6303	0	1	2
-16.4837	1	1	2
50.1219	1	1	2
65.6617	1	1	2
-9.833	0	1	2
96.3677	1	1	2
79.8079	0	1	2
896.431	0	1	2
714.179	0	1	2
30.1242	0	1	2
627.797	1	1	2
260.303	0	1	2
565.728	1	1	2
1119.61	0	1	2
460.032	0	1	2
2538.67	1	1	2
508.353	0	1	2
879.844	1	1	2
592.201	1	1	2
525.891	1	1	2
144.483	0	1	2
490.93	1	1	2
1182.95	1	1	2
454.424	1	1	2
375.284	1	1	2
655.065	1	1	2
475.093	1	1	2
621.688	1	1	2
287.393	1	1	2
122.478	0	1	2
847.04	0	1	2
649.858	0	1	2
314.941	1	1	2
698.467	0	1	2
840.225	0	1	2
552.255	0	1	2
470.142	1	1	2
808.289	0	1	2
1.10575	0	1	2
20.5959	1	1	2
-80.7115	0	1	2
-65.7466	0	1	2
-58.6822	0	1	2
-92.1929	0	1	2
-64.1946	0	1	2
-74.7757	0	1	2
-57.043	0	1	2
-86.6139	0	1	2
-69.1385	0	1	2
-58.3663	0	1	2
-52.0181	1	1	2
-35.3048	0	1	2
-54.6615	0	1	2
2.74308	0	1	2
47.9806	0	1	2
-51.7792	0	1	2
-38.6627	1	1	2
-95.6571	0	1	2
-41.4888	0	1	2
-49.1857	0	1	2
-18.164	1	1	2
-95.0446	0	1	2
30.7596	0	1	2
-64.4684	0	1	2
-73.6825	0	1	2
-95.3313	0	1	2
-93.9223	0	1	2
-57.5953	0	1	2
-58.349	0	1	2
-14.9864	0	1	2
-13.8421	0	1	2
-47.3466	0	1	2
-6.26958	0	1	2
23.0226	0	1	2
-43.4882	0	1	2
-15.7115	0	1	2
42.007	0	1	2
93.2433	0	1	2
-37.5246	0	1	2
-7.37589	0	1	2
6.84527	0	1	2
-22.8477	0	1	2
-23.6886	0	1	2
10.381	0	1	2
127.236	0	1	2
-18.5547	0	1	2
533.633	0	1	2
845.967	0	1	2
801.352	0	1	2
497.636	0	1	2
141.798	0	1	2
328.564	0	1	2
490.719	1	1	2
193.493	0	1	2
-64.6468	0	1	2
107.762	0	1	2
-26.5856	0	1	2
8.11321	0	1	2
-37.8129	0	1	2
637.858	0	1	2
-13.8126	0	1	2
4.49291	0	1	2
24.1298	0	1	2
33.3635	0	1	2
645.672	0	1	2
5.56036	0	1	2
-22.1288	0	1	2
-19.8348	0	1	2
229.417	0	1	2
-57.6941	0	1	2
909.028	0	1	2
-67.6956	0	1	2
567.195	0	1	2
-45.6137	0	1	2
-4.79683	0	1	2
121.122	0	1	2
323.349	0	1	2
12.6046	0	1	2
-22.9834	0	1	2
99.108	0	1	2
94.9269	0	1	2
166.63	0	1	2
250.469	0	1	2
70.6131	0	1	2
212.062	0	1	2
172.299	0	1	2
29.263	0	1	2
281.893	0	1	2
-54.28	0	1	2
253.392	0	1	2
24.0492	0	1	2
153.1	0	1	2
-7.35061	0	1	2
112.894	0	1	2
29.8956	0	1	2
77.9595	0	1	2
309.246	0	1	2
517.979	0	1	2
107.878	0	1	2
37.1379	0	1	2
216.79	0	1	2
8.48289	0	1	2
78.9295	1	1	2
82.8861	0	1	2
141.39	0	1	2
559.078	0	1	2
170.62	0	1	2
249.089	0	1	2
438.345	0	1	2
193.825	0	1	2
230.451	0	1	2
36.9513	0	1	2
-15.4705	0	1	2
157.031	0	1	2
126.993	0	1	2
198.076	0	1	2
363.481	1	1	2
161.19	0	1	2
130.044	0	1	2
132.829	0	1	2
56.4091	0	1	2
335.4	0	1	2
66.1599	0	1	2
67.659	0	1	2
-57.1322	0	1	2
-56.9682	0	1	2
-51.2531	0	1	2
-16.2155	0	1	2
-56.1665	0	1	2
-10.5447	0	1	2
-50.5265	0	1	2
-11.6327	0	1	2
-25.1746	0	1	2
-78.8207	0	1	2
-47.6044	1	1	2
-75.1186	0	1	2
-32.7987	1	1	2
-62.1863	0	1	2
-10.611	0	1	2
-0.459305	1	1	2
48.1748	0	1	2
-14.1762	0	1	2
-51.5753	0	1	2
-13.277	0	1	2
-18.9818	0	1	2
-38.4429	0	1	2
-79.6455	0	1	2
-72.1501	0	1	2
-45.8627	0	1	2
-34.0264	0	1	2
-21.958	0	1	2
-15.6099	0	1	2
-34.5424	0	1	2
-28.0662	0	1	2
-41.6997	0	1	2
-30.518	1	1	2
10.5063	0	1	2
-40.062	1	1	2
-39.0757	1	1	2
-47.8949	0	1	2
-32.3865	0	1	2
-37.5297	0	1	2
19.2211	0	1	2
-74.7131	0	1	2
-11.8279	0	1	2
12.0059	0	1	2
-14.161	0	1	2
-49.2276	0	1	2
-14.8371	0	1	2
59.2984	0	1	2
-74.1912	0	1	2
-18.8956	1	1	2
-63.8879	0	1	2
-1.29823	0	1	2
222.751	0	1	2
85.9252	0	1	2
41.5887	0	1	2
586.77	0	1	2
137.635	0	1	2
186.242	0	1	2
188.128	0	1	2
505.976	0	1	2
166.116	0	1	2
560.393	0	1	2
275.312	0	1	2
185.199	0	1	2
52.5152	0	1	2
311.114	0	1	2
308.527	0	1	2
2861.16	0	1	2
709.956	0	1	2
2184.24	0	1	2
650.656	0	1	2
292.843	0	1	2
908.565	0	1	2
799.937	0	1	2
301.234	0	1	2
24.9095	0	1	2
690.442	0	1	2
458.211	0	1	2
628.693	0	1	2
129.032	0	1	2
-10.4604	0	1	2
326.473	0	1	2
146.076	1	1	2
936.481	0	1	2
-21.7449	1	1	2
1542.89	0	1	2
654.366	0	1	2
979.695	0	1	2
802.931	0	1	2
829.475	0	1	2
216.604	0	1	2
230.624	0	1	2
660.764	0	1	2
1983.42	0	1	2
1039.43	1	1	2
535.7	0	1	2
904.303	1	1	2
268.844	1	1	2
927.553	0	1	2
897.089	0	1	2
427.394	0	1	2
745.03	0	1	2
278.609	1	1	2
420.054	0	1	2
770.234	0	1	2
42.3772	1	1	2
-48.8982	1	1	2
76.0676	0	1	2
668.648	0	1	2
126.353	0	1	2
266.021	1	1	2
1211.7	0	1	2
232.275	0	1	2
-17.2006	1	1	2
179.707	1	1	2
384.496	1	1	2
128.697	0	1	2
-1.39343	0	1	3
-68.1797	1	1	3
-64.0544	1	1	3
-89.5842	1	1	3
-43.1542	0	1	3
-50.5654	0	1	3
1.34418	0	1	3
-62.6602	1	1	3
-51.9205	0	1	3
-49.7975	1	1	3
-21.869	0	1	3
-82.7991	0	1	3
-82.2029	0	1	3
-47.8376	0	1	3
210.422	1	1	3
604.887	1	1	3
519.69	1	1	3
642.933	0	1	3
449.71	0	1	3
594.831	0	1	3
251.919	0	1	3
659.848	0	1	3
214.702	1	1	3
275.311	1	1	3
306.603	0	1	3
294.659	0	1	3
246.172	0	1	3
430.62	0	1	3
110.977	0	1	3
505.319	1	1	3
331.645	0	1	3
279.342	0	1	3
111.972	0	1	3
133.645	0	1	3
223.595	0	1	3
492.122	1	1	3
161.303	0	1	3
304.057	0	1	3
520.556	0	1	3
182.945	1	1	3
720.57	0	1	3
607.486	0	1	3
45.9799	0	1	3
451.677	0	1	3
7.65566	0	1	3
-21.4707	1	1	3
-99.9969	0	1	3
-99.9967	0	1	3
-99.977	0	1	3
-99.9895	0	1	3
-99.9964	1	1	3
-44.4	0	1	3
-6.99941	0	1	3
68.5251	0	1	3
-89.2764	0	1	3
49.2963	0	1	3
-89.1825	0	1	3
-51.5828	0	1	3
-63.7713	1	1	3
-62.0017	0	1	3
153.038	0	1	3
-49.6063	0	1	3
-11.301	0	1	3
210.525	0	1	3
85.2172	0	1	3
-20.6719	0	1	3
96.893	0	1	3
21.8127	0	1	3
132.327	0	1	3
228.161	0	1	3
125.953	0	1	3
-25.5199	0	1	3
48.8857	0	1	3
-47.7673	0	1	3
-41.3641	0	1	3
0.70734	0	1	3
-73.165	0	1	3
64.877	0	1	3
-20.2997	0	1	3
-5.34928	0	1	3
-35.5944	0	1	3
-29.6605	0	1	3
-36.2715	0	1	3
23.2981	0	1	3
-71.6195	0	1	3
-75.7141	0	1	3
-25.6011	0	1	3
-80.6181	0	1	3
1458.81	0	1	3
1500.98	0	1	3
795.448	0	1	3
881.263	0	1	3
2081.43	0	1	3
984.965	0	1	3
1267.05	0	1	3
942.624	0	1	3
2290.72	0	1	3
1659.89	0	1	3
488.732	0	1	3
1246.62	0	1	3
3567.33	0	1	3
1439.48	0	1	3
1203.92	0	1	3
1094.04	0	1	3
865.165	0	1	3
560.854	0	1	3
673.347	1	1	3
476.054	0	1	3
1010.85	0	1	3
2199.89	0	1	3
1081.77	1	1	3
2259.48	0	1	3
4322.89	0	1	3
824.102	0	1	3
1277.83	0	1	3
2299.95	0	1	3
1050.33	0	1	3
809.031	1	1	3
768.041	0	1	3
2727.42	1	1	3
927.574	0	1	3
892.261	1	1	3
1435.59	0	1	3
389.946	0	1	3
900.649	0	1	3
1208.66	0	1	3
725.156	1	1	3
1276.82	0	1	3
956.512	0	1	3
822.57	1	1	3
517.817	1	1	3
753.981	0	1	3
1006.89	0	1	3
193.04	0	1	3
392.804	0	1	3
227.588	0	1	3
325.15	0	1	3
345.275	0	1	3
184.347	0	1	3
631.377	0	1	3
170.441	0	1	3
244.228	1	1	3
604.058	0	1	3
535.569	1	1	3
221.027	0	1	3
450.116	0	1	3
101.522	0	1	3
383.112	0	1	3
401.993	0	1	3
270.859	1	1	3
447.864	0	1	3
-26.1533	0	1	3
77.2797	0	1	3
900.155	0	1	3
513.762	0	1	3
623.323	0	1	3
1.08417	0	1	3
-34.7576	0	1	3
-41.3436	0	1	3
44.5975	0	1	3
1601.03	0	1	3
256.021	0	1	3
-29.8858	0	1	3
334.874	0	1	3
52.2	0	1	3
223.574	0	1	3
47.6072	0	1	3
216.976	0	1	3
94.7254	1	1	3
530.159	0	1	3
50.5531	0	1	3
240.103	0	1	3
1491.31	0	1	3
2081.64	0	1	3
2712.17	0	1	3
1013.2	0	1	3
708.827	1	1	3
1510.61	0	1	3
2095.53	0	1	3
1830.61	0	1	3
1235	0	1	3
1446.5	1	1	3
1642.05	0	1	3
1769.34	0	1	3
1819.78	1	1	3
1577.66	0	1	3
2542.67	0	1	3
2357.98	0	1	3
2767.72	0	1	3
2187.48	0	1	3
349.433	0	1	3
1574.84	0	1	3
3453.04	0	1	3
1483.05	0	1	3
1072.93	1	1	3
1876.46	0	1	3
2115.29	0	1	3
904.355	0	1	3
1025.17	0	1	3
3564.8	0	1	3
983.53	0	1	3
331.472	1	1	3
1624.06	1	1	3
1248.75	1	1	3
529.205	0	1	3
795.209	0	1	3
477.145	0	1	3
549.855	0	1	3
458.776	1	1	3
1591.2	1	1	3
877.369	1	1	3
789.484	1	1	3
267.524	1	1	3
590.028	0	1	3
380.45	1	1	3
657.895	0	1	3
309.988	0	1	3
89.651	1	1	3
456.706	0	1	3
856.191	1	1	3
806.122	0	1	3
676.332	1	1	3
621.262	0	1	3
276.197	0	1	3
465.749	0	1	3
835.052	0	1	3
1075.86	1	1	3
803.756	0	1	3
191.019	0	1	3
-70.6416	0	1	3
-12.9365	0	1	3
-20.033	0	1	3
90.1664	0	1	3
201.886	0	1	3
49.0105	0	1	3
134.703	0	1	3
104.622	0	1	3
217.633	0	1	3
48.9066	0	1	3
-1.20286	0	1	3
51.0578	0	1	3
121.224	0	1	3
188.262	0	1	3
-38.3828	0	1	3
176.514	0	1	3
467.739	0	1	3
22.8679	0	1	3
682.033	0	1	3
236.742	0	1	3
190.342	0	1	3
150.145	0	1	3
366.93	0	1	3
381.454	0	1	3
346.494	0	1	3
19.9142	0	1	3
[truncated: 81,713 more rows]

## Sheet: Fig. 3a
FAF pre	FAF post	AC pre	AC post	freq_band			Frequency bands
9.65498	0	0	3.44823	1			1. delta
6.54522	0.239503	0	0	1			2. theta
6.33825	0	0	0.922367	1			3. alpha
8.86634	0	0	0.0692422	1			4. beta1
5.474	0	0	2.5989	1			7. gamma2
8.3228	0	0	0.0353211	1
9.55865	0.128155	0	0	1
7.37643	0.0903769	0	0.00652172	1
5.67589	0	0	0.874641	1
5.1214	0	0	4.17517	1
3.89274	0	0	3.21654	1
6.14279	0	0	0.76344	1
7.51507	0	0	2.28512	1
6.00579	0	0	1.52437	1
6.48262	1.29354	0	0	1
8.33791	0	0	0.49049	1
7.41178	0	0	2.65423	1
9.4232	0	0	4.31324	1
3.39304	0	0	2.78852	1
6.52014	0	0	3.74631	1
4.72181	0	0	3.12459	1
8.95754	0	0	2.38205	1
7.81408	0	0	2.08323	1
3.85137	0	0	1.13351	1
6.58656	0	0	2.67857	1
9.18806	0	0	1.534	1
6.39412	1.51877	0	0	1
5.10114	0	0	2.25619	1
4.97748	0.075295	0	0.0305268	1
5.96187	1.8482	0	0	1
10.0022	0.389869	0	0	1
5.49132	0	0	3.02855	1
3.53079	0	0	0.490977	1
3.62822	0.999672	0	0	1
4.0986	0	0	1.29733	1
9.76699	0	0	3.0176	1
4.39092	0	0	3.98958	1
6.4459	0	0	2.46863	1
0.73191	0	0	3.08351	1
6.94707	0	0	2.47939	1
13.2433	1.60018	0	0	1
1.92002	0	0	2.23974	1
6.86215	0	0	1.5779	1
4.36324	0	0	2.66379	1
4.617	0	0	2.14535	1
5.46018	0	0	1.32927	1
0.866621	0	0	2.75751	1
10.1243	0	0	4.05663	1
6.74826	0	0	0.834198	1
6.25576	0	0	2.4337	1
9.01484	0	0	1.14889	1
6.39495	0	0	1.84987	1
3.56237	0	0	2.19959	1
7.50919	0	0	1.04259	1
6.43314	0.117344	0	0	1
6.19781	1.03794	0	0	1
8.56001	0	0	1.0617	1
6.62073	0	0	2.67533	1
4.26751	0	0	0.449161	1
1.38326	0	0	1.02966	1
6.30087	0	0	0.860631	1
6.12877	1.01503	0	0	1
5.32896	0	0	1.05228	1
4.15889	0.577757	0	0	1
8.1513	0	0	4.10389	1
2.42416	3.71896	0	0	1
0	0	0.505336	0.439903	1
6.36804	0.632081	0	0	1
6.00354	2.25234	0	0	1
5.94444	0	0	1.51989	1
0	0	0.180329	2.63251	1
6.08059	0	0	2.34763	1
4.21372	0	0	1.58275	1
4.94991	1.10723	0	0	1
6.16002	0	0	0.317147	1
5.62657	0	0	2.20677	1
4.75938	0	0	1.4994	1
1.77042	0.21628	0	0.15889	1
5.90053	0	0	0.89802	1
4.79248	0	0	2.90158	1
7.6531	0	0	1.65645	1
4.93273	1.05127	0	0	1
8.64256	0	0	6.4056	1
6.7025	0	0	3.20823	1
10.5947	0	0	1.78049	1
6.05941	0	0	0.896937	1
5.14248	0.147252	0	0	1
4.80694	0.103858	0	0.994475	1
5.68474	0	0	3.50661	1
7.43547	0	0	2.07516	1
5.99277	0	0	0.225531	1
7.63021	0	0	2.98153	1
6.76289	0	0	5.39263	1
6.05962	0	0	0.840723	1
6.41766	0	0	2.49644	1
5.6872	0	0	2.83015	1
9.44361	0	0	2.47033	1
5.96207	0	0	0.82951	1
1.47804	0	0	4.71401	1
2.15662	0.946122	0	0	1
3.6037	0	0	1.15489	1
4.91865	0	0	0.179814	1
5.48399	0	0	3.11828	1
5.09153	0.0349962	0	0.0197203	1
7.36308	1.08461	0	0	1
4.39536	0.744739	0	0	1
8.72866	0	0	1.69902	1
4.41289	0.0829378	0	0	1
5.35061	0	0	1.47198	1
4.68975	0	0	0.410772	1
11.1405	0	0	0.0784489	1
9.74558	1.77933	0	0	1
4.11102	0	0	3.39095	1
6.45632	0	0	2.7679	1
9.57646	0	0	3.43325	1
6.21199	0.224047	0	0	1
7.51603	0	0	0.648869	1
5.73416	0	0	3.93033	1
5.75013	2.36732	0	0	1
7.62795	0	0	0.231189	1
4.49949	0	0	2.40495	1
4.5722	0	0	1.83233	1
5.74086	0.0922177	0	0	1
5.17801	0.829205	0	0	1
4.6738	0	0	3.54989	1
2.8389	0	0	2.43919	1
7.08807	0	0	0.834187	1
6.80149	0	0	2.18138	1
5.92217	0	0	0.427982	1
7.83888	0	0	2.10605	1
2.51839	0	0	0.939784	1
1.69335	0	0	1.59708	1
4.08674	0	0	1.38288	1
4.19637	0.280131	0	0.266448	1
6.95396	0	0	1.78152	1
0.436101	0	0	2.43257	1
7.88112	0	0	1.88826	1
8.62982	0.168861	0	0.0726462	1
4.13298	0	0	2.24158	1
4.46522	2.22088	0	0	1
6.12911	1.03219	0	0	1
7.79533	0	0	1.90115	1
9.55857	0	0	1.42607	1
7.62827	0	0	2.78268	1
8.07943	0	0	2.1163	1
6.55079	0	0	4.80375	1
5.93564	0	0	0.594059	1
1.2272	0	0	2.43093	1
6.05634	0	0	1.11075	1
1.36061	0	0	1.79609	1
4.85111	0.160521	0	0	1
1.18616	0.118666	0	0	1
4.81188	1.17506	0	0	1
7.26066	0	0	1.89469	1
6.17307	1.61631	0	0	1
2.02124	0.465795	0	0	1
7.4749	0.0914637	0	0.410132	1
5.63151	0.662446	0	0	1
3.27801	0	0	3.31245	1
9.67873	0.656774	0	0	1
7.1004	0	0	3.10712	1
5.81825	0	0	2.5083	1
5.64989	0.93048	0	0	1
7.99482	0	0	2.92572	1
6.13382	0.324958	0	0	1
8.30045	0	0	2.11605	1
4.84662	0	0	4.00642	1
9.44135	0	0	0.998747	1
4.35789	0	0	2.48994	1
6.8346	0.161985	0	0.0766357	1
4.14909	0.00267626	0	0.320924	1
7.22534	0	0	4.20907	1
3.51101	0	0	2.74551	1
5.47737	0	0	2.753	1
5.82636	1.23178	0	0	1
7.55603	1.00964	0	0	1
7.36131	0	0	1.35086	1
7.87975	0	0	1.77832	1
6.41098	2.50581	0	0	1
3.86744	0	0	2.08646	1
4.61517	0	0	1.05315	1
6.72531	0	0	0.470521	1
4.76023	0	0	0.62796	1
3.09127	0	0	2.10468	1
7.1467	1.19532	0	0	1
4.62861	0	0	1.56285	1
9.00381	0	0	3.6504	1
8.52642	0	0	0.339556	1
4.96684	0.863218	0	0	1
4.10253	0	0	1.11846	1
7.18241	0	0	1.12905	1
6.33716	0.276883	0	0	1
7.51236	1.40621	0	0	1
5.5527	0	0	2.71413	1
1.94185	0.565131	0	0	1
8.56161	0.773812	0	0	1
0.173631	0	0.0501768	4.05792	1
7.3136	0.447694	0	0	1
7.23298	0	0	0.10153	1
8.29448	0	0	2.10994	1
3.85824	0	0	0.406417	1
7.27151	0	0	2.11411	1
7.1677	0	0	1.60488	1
10.1491	0	0	1.96794	1
5.63618	0	0	2.54036	1
4.57242	0	0	1.09446	1
4.56419	0	0	2.14169	1
6.06065	0	0	2.89482	1
5.16566	0	0	0.14961	1
1.82235	0	0	2.0467	1
6.24324	0.359724	0	0	1
5.23318	0	0	1.77332	1
12.1394	0	0	3.07979	1
4.76357	0	0	1.82147	1
5.99352	1.88783	0	0	1
5.79011	0.00361758	0	0.0281093	1
8.7668	0	0	4.12698	1
2.91249	0	0	2.47757	1
9.79507	2.0067	0	0	1
5.8224	1.68915	0	0	1
2.42516	0	0	1.3265	1
1.56656	2.52147	0	0	1
7.58754	3.71794	0	0	1
9.75464	0	0	1.62711	1
7.26245	0	0	3.38629	1
2.97896	0	0	3.23171	1
8.43549	2.02364	0	0	1
7.11966	0.676963	0	0	1
2.99636	0	0	3.10649	1
3.19104	0	0	2.34417	1
4.29444	0	0	1.21372	1
9.00529	0	0	2.7915	1
6.10347	0	0	1.10493	1
3.02775	0	0	1.85443	1
6.79067	0	0	2.71319	1
7.07522	0	0	1.92493	1
5.20192	1.46676	0	0	1
6.6156	0	0	0.942924	1
0.927155	0	0	1.98854	1
3.49091	0.381801	0	0	1
7.37505	0	0	0.99827	1
9.74631	0.139777	0	0.0907428	1
8.82121	0	0	0.204359	1
3.69732	0	0	0.0748106	1
3.98045	0.310958	0	0	1
2.92047	0	0	2.1255	1
8.34924	0	0	5.25649	1
6.92278	0	0	1.49114	1
6.97633	0	0	0.957585	1
7.61238	0	0	0.270206	1
5.96244	0	0	1.65805	1
4.7071	0	0	1.59225	1
6.1934	0	0	1.22812	1
5.87857	0	0	3.00061	1
4.58128	0	0	1.85689	1
3.40791	0	0	4.03647	1
8.23291	0	0	3.7749	1
4.91157	0	0	1.71996	1
3.57089	2.51206	0	0	1
6.99822	0	0	0.581873	1
2.86894	0	0	1.88827	1
6.27387	0	0	4.32414	1
8.7113	0	0	0.53146	1
8.49992	0.277741	0	0	1
4.43806	0	0	1.38145	1
5.2309	0.629258	0	0	1
5.19779	1.57997	0	0	1
4.92796	0.580401	0	0	1
2.98784	0.0891088	0	0	1
7.09267	0	0	1.9467	1
5.08243	0.425752	0	0	1
6.2832	0	0	1.20808	1
8.0157	0	0	2.39267	1
1.98846	0	0	1.77175	1
9.26829	0.641429	0	0	1
7.32482	0	0	0.141161	1
2.52586	0	0	0.806613	1
5.75416	0	0	0.0454123	1
7.87084	0	0	3.34693	1
6.70142	0	0	0.507732	1
6.58764	0	0	0.706649	1
9.08501	0	0	3.99165	1
4.0923	0	0	0.787333	1
5.08578	0	0	3.95201	1
7.37072	0	0	1.33294	1
4.85135	0	0	3.26207	1
3.81049	0	0	1.23664	1
5.68826	0	0	4.24193	1
6.90531	0	0	0.308503	1
4.91572	0.08449	0	0	1
9.25057	0	0	2.34039	1
5.46108	1.01484	0	0	1
6.34174	0.000754495	0	0.00765749	1
6.58766	0	0	3.3119	1
8.29727	0	0	5.15185	1
5.45229	0	0	2.9931	1
6.18557	0	0	1.45301	1
4.91534	0	0	4.70741	1
3.36748	0	0	1.24991	1
8.51515	0.400926	0	0	1
4.01053	0	0	0.828349	1
4.31644	0	0	2.19412	1
7.89866	0	0	0.636862	1
5.9088	0	0	2.00047	1
3.4073	0.650001	0	0	1
11.5809	0	0	0.755823	1
7.0809	0	0	0.587106	1
11.6796	0	0	1.49548	1
6.80832	0	0	1.20667	1
7.19104	0	0	0.738121	1
2.38273	0	0	1.11269	1
7.08689	0	0	0.879215	1
7.09757	0	0	0.544167	1
6.89663	0	0	1.07109	1
6.51603	0.190633	0	0	1
1.44684	0.780848	0	0	1
5.21501	0	0	1.65966	1
6.26114	0	0	0.663677	1
1.74964	0.165025	0	0	1
7.44484	0	0	1.63295	1
11.2121	0	0	1.74528	1
2.88965	0	0	2.23107	1
7.59946	0	0	3.85508	1
4.25765	0	0	3.43263	1
9.95259	1.30999	0	0	1
7.4147	0.200287	0	0.0254749	1
5.40871	0	0	0.884355	1
7.98919	0	0	0.860803	1
3.05016	0	0	2.26664	1
8.79457	0.957737	0	0	1
1.39579	0	0	2.8166	1
5.39364	0	0	3.1183	1
6.01119	0	0	0.111675	1
5.3673	0.666761	0	0	1
6.60166	0	0	1.77519	1
8.47998	0	0	2.98675	1
4.56788	0.286867	0	0	1
9.01743	0	0	0.657669	1
5.91086	0	0	4.84752	1
8.32547	0.175712	0	0	1
1.91909	0	0	3.31915	1
8.56729	0	0	3.39514	1
0.409895	0	0	0.630836	1
0.536101	0	0	1.87547	1
4.50532	0.220417	0	0	1
3.87473	0	0	3.21352	1
7.15726	1.12828	0	0	1
6.06948	0.407714	0	0.0344212	1
6.96134	0	0	2.3366	1
4.22422	0	0	0.173216	1
2.80777	0	0	5.10307	1
12.1798	0.0604205	0	0.035001	1
5.64681	0	0	3.21288	1
5.19993	0.254992	0	0	1
4.27302	0	0	1.53026	1
3.92872	0	0	2.79177	1
5.12225	0	0	3.48863	1
1.50408	0	0	2.57382	1
6.92859	0	0	1.3901	1
3.41552	0.233504	0	0.486562	1
10.5828	0	0	0.821535	1
3.38253	0.794918	0	0	1
3.18526	1.07017	0	0	1
3.29288	0	0	3.56268	1
4.68149	0	0	2.91544	1
7.6336	0	0	3.14941	1
8.0064	0	0	0.216321	1
2.99385	0	0	3.58718	1
7.80425	0.338564	0	0	1
5.71571	0	0	0.0145569	1
7.80258	0.920209	0	0	1
7.21964	0.840291	0	0	1
6.12472	0	0	1.71254	1
7.75866	0	0	2.66887	1
6.89611	0.322881	0	0.47378	1
6.59942	1.78328	0	0	1
5.73737	0	0	3.33445	1
0.878464	0	0	3.67517	1
7.36195	0	0	2.83014	1
5.4288	0	0	2.34947	1
5.83716	1.54191	0	0	1
3.43003	0	0	4.34449	1
7.47051	1.55704	0	0	1
4.19322	0	0	1.72015	1
9.44554	0	0	0.976276	1
9.05841	1.34342	0	0	1
5.95056	0	0	0.554814	1
13.3443	0	0	0.299796	1
4.67594	0	0	2.69235	1
6.82425	0	0	0.66153	1
8.28493	0	0	2.2834	1
5.57346	0	0	2.50302	1
7.09025	0	0	3.03349	1
7.76539	0	0	1.02744	1
6.04277	0	0	0.688232	1
8.28571	0	0	2.02955	1
5.3183	1.02932	0	0	1
0	0.301779	0.0621569	0.0354702	1
5.55398	0	0	2.73633	1
5.29661	1.05742	0	0	1
4.50423	0.00853799	0	0.316515	1
4.71229	0.0152058	0	0.00651477	1
4.20909	0.93237	0	0	1
7.28473	0	0	1.1204	1
6.61826	0.84782	0	0	1
4.31955	2.14267	0	0	1
3.97338	0	0	4.75695	1
1.79734	0	0	2.99491	1
8.51841	0.609227	0	0	1
3.6392	0	0	0.920085	1
2.9837	0	0	0.727822	1
8.17599	0.167784	0	0	1
5.53456	0.33693	0	0	1
7.9676	0.00432458	0	0.0017072	1
6.78668	0.00799095	0	0.237503	1
9.41256	0	0	3.87778	1
2.42459	0	0	2.7718	1
3.70156	1.53225	0	0	1
7.01962	0	0	0.986944	1
6.00524	0	0	2.27096	1
5.51116	2.05123	0	0	1
3.80096	0	0	3.04143	1
5.0392	0.377286	0	0	1
9.07306	0	0	3.5387	1
4.92459	0	0	2.25419	1
2.54939	0	0	1.75231	1
4.26712	0	0	2.01602	1
8.78141	0	0	2.11904	1
5.00585	0	0	2.87949	1
5.66955	0	0	0.0610474	1
5.4586	0	0	2.28647	1
4.24051	0	0	3.30229	1
6.88557	0	0	0.674192	1
5.06487	0	0	1.45403	1
7.34118	0	0	4.64218	1
5.85287	0	0	2.32605	1
7.00748	0	0	1.36676	1
9.12014	0	0	0.782063	1
6.52907	0	0	0.314494	1
5.23195	0	0	0.21276	1
5.86041	0	0	0.110475	1
7.57987	1.20293	0	0	1
9.43598	0	0	3.15425	1
4.60656	0	0	2.13625	1
4.47709	0	0	3.18089	1
6.30052	0	0	0.938304	1
5.0399	0	0	1.07098	1
7.49757	0	0	2.28381	1
5.67587	0	0	1.84608	1
4.46338	0	0	2.0079	1
2.66749	1.85991	0	0	1
6.47303	0	0	1.41738	1
10.2501	0	0	1.25139	1
7.33679	0	0	1.20134	1
7.78771	0	0	3.03854	1
4.87359	0.370141	0	0	1
1.00715	0	0	1.73556	1
7.32271	0	0	0.371068	1
7.61975	0.544609	0	0	1
5.13821	0	0	0.157395	1
6.6717	0	0	2.15004	1
3.06277	0	0	0.813312	1
5.16161	0.097716	0	0	1
5.91251	0	0	1.31962	1
6.91939	0.99828	0	0	1
8.27452	0.75611	0	0	1
3.99708	0	0	2.32924	1
6.9533	0	0	1.02303	1
9.01362	0	0	1.40229	1
5.66974	0	0	0.613579	1
9.42103	0	0	2.39864	1
4.47187	0	0	3.46919	1
6.79411	0	0	1.25737	1
6.405	0	0	0.988323	1
3.95648	0	0	1.66388	1
6.61515	0.680649	0	0	1
6.65405	2.46877	0	0	1
5.40334	0	0	1.32837	1
5.32152	0	0	0.21354	1
8.07732	0	0	3.0773	1
5.79043	0	0	1.61821	1
6.56306	0	0	0.913374	1
5.03562	0	0	1.66936	1
4.52033	0	0	0.555832	1
5.82941	0	0	1.36222	1
7.51954	0.16844	0	0.0226132	1
8.07806	0	0	0.398374	1
5.06355	0	0	2.23892	1
4.75825	3.09231	0	0	1
2.18233	0	0	0.958796	1
8.31197	0	0	1.78674	1
7.22226	0.561704	0	0.196514	1
4.4717	0	0	1.92307	1
5.82368	0	0	1.24149	1
8.03112	0	0	0.0923819	1
5.16319	0.173496	0	0	1
5.6717	0	0	0.289016	1
5.80332	3.92503	0	0	1
6.64066	0.0916589	0	0.0385647	1
8.35171	0	0	2.576	1
4.84646	4.60063	0	0	2
2.0795	1.13061	0	0	2
3.93489	2.6304	0	0	2
1.93943	1.19539	0	0	2
0	2.38361	0.683469	0	2
0	1.81643	0.227871	0	2
6.74099	2.42925	0	0	2
2.43186	4.21551	0	0	2
2.06183	0.807256	0	0	2
3.09679	2.50716	0	0	2
3.61495	1.52044	0	0	2
4.42836	2.47763	0	0	2
3.71494	1.711	0	0	2
3.02771	1.58618	0	0	2
0.826029	0	0	1.24563	2
1.1513	0.0453678	0	0.562049	2
2.95504	1.01969	0	0	2
1.59595	1.28948	0	0	2
3.59755	0.874201	0	0	2
0	1.94125	0.45632	0	2
3.15834	2.42917	0	0	2
2.13377	0.833083	0	0	2
2.10009	3.01551	0	0	2
4.65897	2.88342	0	0	2
3.14124	0.824199	0	0	2
1.39041	2.18499	0	0	2
2.48861	0	0	1.90533	2
1.28421	1.20851	0	0	2
2.72426	3.38055	0	0	2
0.454897	5.76515	0	0	2
3.19945	0.15098	0	0.073251	2
2.39916	3.01196	0	0	2
1.61613	0	0	1.76443	2
0.821364	0	0	0.531116	2
2.74636	1.66589	0	0	2
3.6755	0.884552	0	0	2
2.28523	0	0	1.19679	2
3.0211	2.25247	0	0	2
4.43864	0	0	1.532	2
1.23586	1.01348	0	0	2
0.0289519	0.561301	0.0417833	0	2
2.51341	2.35466	0	0	2
4.95612	0.342436	0	0	2
2.09738	3.37123	0	0	2
0	0	0.439497	0.43005	2
0.757861	0.000589117	0	0.520834	2
2.58542	0	0	0.323741	2
1.07652	5.4824	0	0	2
1.6743	1.14327	0	0	2
6.10887	1.8351	0	0	2
4.29693	0	0	1.55168	2
1.96418	1.33425	0	0	2
0.729681	0.968409	0	0	2
5.0217	2.93273	0	0	2
2.10173	4.46204	0	0	2
0.810011	1.07443	0	0	2
2.46791	5.02186	0	0	2
3.3195	2.29894	0	0	2
0	3.84596	2.53668	0	2
3.58754	1.85277	0	0	2
2.95228	1.79641	0	0	2
1.75706	2.80776	0	0	2
0	0.79019	1.46692	0	2
1.25185	0.365828	0	0	2
4.66588	0.566903	0	0	2
0	0	1.91688	0.359106	2
3.21645	0	0	0.322897	2
1.95526	1.71126	0	0	2
2.76558	0.0799538	0	0	2
3.50664	0	0	5.40903	2
1.87934	0.0162128	0	0	2
2.28461	0.382885	0	0	2
1.16071	1.89107	0	0	2
3.16911	0.116463	0	0	2
4.26029	3.18286	0	0	2
2.50053	0	0	1.29911	2
0.816449	4.1435	0	0	2
1.27005	0	0	0.42147	2
1.34289	0	0	0.160308	2
4.12738	0.755116	0	0	2
3.52939	1.42535	0	0	2
3.13439	2.3217	0	0	2
3.40807	0	0	1.27313	2
5.72456	2.03587	0	0	2
0	0.00791705	3.102	0.0207227	2
3.76835	2.25211	0	0	2
4.12961	1.74501	0	0	2
3.73588	2.85455	0	0	2
0	1.98156	1.32992	0	2
0	1.60771	0.132155	0	2
3.54913	3.6468	0	0	2
5.95794	1.67562	0	0	2
5.84294	2.94424	0	0	2
1.39824	2.42202	0	0	2
3.36032	0.101723	0	0.00692433	2
3.59885	4.65946	0	0	2
1.72748	1.10322	0	0	2
0	2.5107	2.60877	0	2
4.86995	2.68437	0	0	2
2.41872	4.56028	0	0	2
5.25992	2.30935	0	0	2
6.6909	2.35009	0	0	2
3.3138	3.63812	0	0	2
0	2.14311	1.71509	0	2
4.28373	0.125249	0	0.0873157	2
0.0438759	0	0.0485071	1.29158	2
2.7205	0	0	2.88821	2
2.10888	0.500003	0	0	2
2.82207	0.316022	0	0	2
4.61037	2.69508	0	0	2
0.187119	1.03371	0	0	2
0	3.33058	0.621576	0	2
5.93035	0	0	1.85295	2
0	4.81099	1.09066	0	2
4.69029	0	0	3.04993	2
5.94957	1.87221	0	0	2
2.42691	1.90748	0	0	2
0.549433	0.584904	0	0	2
4.6895	0	0	2.01888	2
0	0	2.15955	0.46125	2
4.62755	0	0	0.317752	2
2.22213	1.93837	0	0	2
3.16271	0.25324	0	0	2
0.455974	0	0	2.24997	2
7.08062	0	0	0.457735	2
2.6546	2.0537	0	0	2
1.78088	0.57397	0	0	2
6.15463	1.85264	0	0	2
1.1604	1.80553	0	0	2
2.86035	1.86517	0	0	2
2.65184	1.23134	0	0	2
3.32573	1.83291	0	0	2
6.26153	2.39742	0	0	2
1.39528	2.04479	0	0	2
5.20476	0.577798	0	0	2
0.995399	0	0	1.00425	2
0.714783	0	0	1.83968	2
0.336481	0	0	0.967945	2
5.80057	0.00961542	0	0.119616	2
5.10412	0	0	0.383701	2
0.66664	1.20707	0	0	2
1.72774	2.08629	0	0	2
2.44907	0	0	3.37467	2
7.37944	4.44613	0	0	2
5.02792	0	0	1.26953	2
3.24507	2.83887	0	0	2
2.03525	3.39446	0	0	2
0.390494	1.69139	0	0	2
1.82838	2.29494	0	0	2
1.81861	2.31257	0	0	2
2.54967	2.25403	0	0	2
0	2.12284	0.36985	0	2
1.29084	2.51206	0	0	2
5.41652	6.33891	0	0	2
0.254018	1.77028	0	0	2
2.99843	6.03911	0	0	2
3.61772	2.62522	0	0	2
4.13887	2.45313	0	0	2
0.788338	0	0	1.65132	2
0	3.28168	1.13193	0	2
0.0390094	0.126434	0.0103025	0.137763	2
1.65031	0	0	1.50948	2
0	0	2.11028	1.51478	2
1.69791	0	0	0.21497	2
1.54196	0.674222	0	0	2
0.990053	0	0	0.585717	2
3.7166	3.15105	0	0	2
3.04328	1.52677	0	0	2
0.944427	3.3482	0	0	2
0.838127	0.467927	0	0	2
3.78934	4.6895	0	0	2
2.81502	3.34949	0	0	2
1.59562	1.53839	0	0	2
0	0	0.996356	1.5581	2
5.8225	3.59235	0	0	2
1.90501	0	0	0.888759	2
2.93522	2.2047	0	0	2
3.65157	2.02038	0	0	2
2.26314	0	0	0.958738	2
2.03399	2.6999	0	0	2
0.666871	0.666713	0	0	2
0	4.79111	0.0584633	0	2
0.50236	0	0	0.212187	2
1.96644	1.51623	0	0	2
3.75776	2.35267	0	0	2
4.74501	0	0	0.238735	2
1.82663	2.65817	0	0	2
2.72342	1.58273	0	0	2
0.91227	4.43592	0	0	2
2.20595	0	0	0.704534	2
1.99424	2.09056	0	0	2
3.64952	2.61117	0	0	2
4.70603	0.324924	0	0	2
3.02479	1.69738	0	0	2
0	1.39473	1.23088	0	2
1.22838	3.37811	0	0	2
3.06575	1.81066	0	0	2
2.99236	3.59514	0	0	2
1.7925	1.68237	0	0	2
0	1.78678	1.04815	0	2
2.85527	0	0	0.627506	2
0	5.12935	0.662062	0	2
0	0	0.45568	0.943779	2
0.255946	3.11551	0	0	2
2.15201	3.22224	0	0	2
4.3901	1.54061	0	0	2
2.26445	0.248051	0	0.157168	2
4.48696	2.71787	0	0	2
3.941	2.46083	0	0	2
3.97493	3.02314	0	0	2
3.53767	2.82213	0	0	2
1.11161	0.648085	0	0	2
1.64718	1.83211	0	0	2
1.72534	3.25295	0	0	2
1.0989	0	0	2.43631	2
2.56393	1.80657	0	0	2
5.51203	1.95765	0	0	2
2.96051	2.78245	0	0	2
2.08899	0.21916	0	0	2
3.13109	2.01313	0	0	2
3.36035	3.7476	0	0	2
0	0	1.93837	0.130035	2
2.3495	3.43041	0	0	2
3.44396	0	0	1.3224	2
4.293	0.295248	0	0	2
3.99632	1.32037	0	0	2
1.33627	0	0	1.09155	2
0.563056	2.87073	0	0	2
0	3.18931	1.54581	0	2
5.84075	1.08984	0	0	2
2.5144	0	0	0.926027	2
4.71824	3.05143	0	0	2
5.13683	0.549279	0	0	2
3.05187	0.816419	0	0	2
3.76079	4.16422	0	0	2
4.18519	3.26393	0	0	2
1.24187	0	0	0.671011	2
2.56807	0	0	0.289469	2
1.66192	1.20637	0	0	2
0.0183468	0	0.193675	0.7206	2
4.13796	0	0	0.370102	2
6.90846	2.6346	0	0	2
2.44885	3.73788	0	0	2
0.617335	2.48573	0	0	2
4.3342	1.29349	0	0	2
7.1012	0	0	1.25668	2
2.0611	0	0	0.59156	2
2.15556	0	0	0.327546	2
2.50128	1.80878	0	0	2
0.556197	5.59718	0.264578	0	2
1.96805	0.581507	0	0	2
4.01934	5.51354	0	0	2
0.481499	4.6287	1.05396	0	2
4.41317	0.440178	0	0	2
1.8346	0.116021	0	0.0118054	2
0.296771	0	0	0.117013	2
3.72085	2.24825	0	0	2
0	0.324038	0.488173	0	2
2.69782	2.16757	0	0	2
2.0172	3.35896	0	0	2
3.03246	1.68977	0	0	2
2.63097	2.17809	0	0	2
3.93899	1.94248	0	0	2
5.12239	3.80715	0	0	2
2.37418	1.40335	0	0	2
0	3.90069	1.21933	0	2
0.615557	5.65256	0	0	2
2.57057	4.6193	0	0	2
0.0283958	2.37646	0	0	2
3.65257	0.568245	0	0	2
4.0525	0.4737	0	0	2
0	1.93065	0.334003	0	2
2.25588	1.10794	0	0	2
3.02117	2.99757	0	0	2
3.41798	1.52417	0	0	2
0.214381	1.36624	0.135569	0	2
0.764464	2.17619	0	0	2
0.640164	3.2758	0.214065	0	2
3.63715	0	0	1.01541	2
3.12908	2.19323	0	0	2
3.23574	1.65674	0	0	2
1.84983	0.502537	0	0.0172278	2
1.67923	0.785077	0	0	2
4.39058	0	0	0.772015	2
1.94579	1.5016	0	0	2
2.24682	0.0833964	0	0.0102936	2
4.85134	2.75744	0	0	2
2.95243	1.51793	0	0	2
0	3.75332	1.30008	0	2
1.76126	0	0	1.13917	2
1.99488	3.85352	0	0	2
0.699044	0.474712	0	0	2
6.87622	2.9456	0	0	2
4.14301	1.22504	0	0	2
3.47702	1.96644	0	0	2
2.89827	0.829418	0	0	2
1.60876	1.56586	0	0	2
5.41716	1.09426	0	0	2
4.88064	1.83727	0	0	2
3.91382	3.1705	0	0	2
0	3.54409	2.43415	0	2
3.55164	1.14477	0	0	2
3.44038	2.02068	0	0	2
0.766549	2.24323	0	0	2
1.19766	1.09556	0	0	2
0.71469	4.16533	0	0	2
1.35803	1.58204	0	0	2
1.47673	2.19828	0	0	2
4.44171	0	0	0.368488	2
0.94882	1.33642	0	0	2
4.2686	4.25402	0	0	2
5.0077	0	0	0.447539	2
1.4557	2.40836	0	0	2
0.0932103	1.39027	0.357532	0	2
1.55564	1.11913	0	0	2
1.2667	3.49081	0	0	2
1.55548	0	0	3.13705	2
1.75724	0.687184	0	0	2
1.12237	5.97379	0	0	2
4.71073	3.74417	0	0	2
2.29042	4.32931	0	0	2
5.68052	5.03989	0	0	2
1.94902	0	0	0.696046	2
6.35363	0	0	0.796285	2
4.95192	1.45844	0	0	2
1.80848	2.78634	0	0	2
3.03543	0	0	0.706097	2
0	0	0.667536	0.743453	2
2.87854	4.60342	0	0	2
0	2.83238	1.4165	0	2
3.8738	2.30262	0	0	2
2.3264	0.227661	0	0	2
3.64418	0	0	1.7101	2
4.23059	1.95312	0	0	2
4.86896	0	0	1.03942	2
2.83828	0	0	0.57517	2
1.89629	1.46878	0	0	2
4.64859	1.15099	0	0	2
3.75688	0	0	0.216502	2
1.3747	0.5002	0	0	2
1.0379	0.537639	0	0	2
5.35872	1.66461	0	0	2
1.85244	1.70751	0	0	2
2.58769	1.67492	0	0	2
1.42443	3.45701	0	0	2
2.90636	0.138619	0	0	2
0.631238	5.71347	0	0	2
3.33853	2.34966	0	0	2
7.58425	0.330295	0	0	2
2.88596	1.24177	0	0	2
4.17327	2.64251	0	0	2
0	2.45773	1.60724	0	2
4.05025	0	0	2.96244	2
1.6833	0	0	1.50873	2
4.74241	1.97228	0	0	2
4.18902	0.204501	0	0.0379314	2
0.622265	2.51544	0	0	2
2.01646	0	0	0.469402	2
2.87414	0	0	0.64297	2
4.62422	1.6873	0	0	2
1.71903	0	0	2.02429	2
4.0081	3.75877	0	0	2
1.60906	1.28568	0	0	2
1.64575	3.00631	0	0	2
2.09693	2.79551	0	0	2
0.404414	1.02123	0	0	2
0.843936	0	0	0.424636	2
4.02927	3.5853	0	0	2
3.22882	1.06215	0	0	2
3.32711	1.72957	0	0	2
3.0207	1.4201	0	0	2
0	0	1.21738	2.97424	2
0.77	4.71877	0	0	2
1.88917	1.17226	0	0	2
3.09191	1.21235	0	0	2
3.71444	0	0	0.820025	2
4.41177	0.586442	0	0	2
3.17278	2.00279	0	0	2
2.08632	1.14828	0	0	2
2.88085	2.37775	0	0	2
0.679671	2.16993	0	0	2
4.93888	4.40235	0	0	2
0	4.20786	1.41822	0	2
0.274546	1.88008	0.118067	0	2
1.40438	2.40296	0	0	2
0	0.0498184	0.39925	0.00467477	2
0	0	2.16017	0.691475	2
2.95492	3.20091	0	0	2
4.04248	0	0	0.358987	2
1.97498	5.53745	0	0	2
1.15319	0.167652	0	0	2
5.76414	1.85104	0	0	2
1.91552	1.23439	0	0	2
4.35742	1.04786	0	0	2
0.863655	0	0	1.37596	2
1.51757	4.92357	0	0	2
3.06008	0	0	3.15352	2
0.463029	3.34547	0	0	2
5.96815	0	0	0.807581	2
1.40526	3.26195	0	0	2
0	0.057593	0.985997	0.0828567	2
1.3345	2.18528	0	0	2
2.82131	3.89085	0	0	2
6.97395	5.91681	0	0	2
2.55592	3.37992	0	0	2
1.8156	0.120836	0	0.187217	2
5.41745	0	0	1.90202	2
7.02932	0.167718	0	0	2
2.44477	0	0	2.31451	2
3.2084	2.84951	0	0	2
4.03761	1.02309	0	0	2
2.60475	1.55063	0	0	2
0	0	1.27774	0.0539953	2
0.586074	0.696827	0	0.0607167	2
0	0.604204	1.39837	0	2
3.68051	3.21517	0	0	2
3.43108	1.26222	0	0	2
2.55231	0.00617082	0	0.121059	2
0.190468	0.778248	0.150927	0	2
5.94496	2.90707	0	0	2
2.84445	0.00429102	0	0.0432885	2
4.026	2.72655	0	0	2
0.201567	1.3174	0	0	2
4.58797	0	0	0.361004	2
1.27882	3.07538	0	0	2
2.63529	4.4726	0	0	2
3.57403	2.87718	0	0	2
0	4.89141	2.15889	0	2
3.23493	0.669068	0	0	2
1.07634	2.45006	0	0	2
5.03509	4.54658	0	0	2
2.51419	2.07609	0	0	2
1.51209	0.482189	0	0	2
2.23847	4.87097	0	0	2
1.74086	4.53917	0	0	2
4.65447	0	0	2.57579	2
3.31329	3.92722	0	0	2
6.39422	1.21789	0	0	2
0	0.618662	0.211233	0	2
2.21002	0	0	1.36121	2
1.08389	1.99085	0	0	2
8.28539	0	0	0.409918	2
2.9371	1.29487	0	0	2
3.32687	0.113315	0	0	2
5.35776	1.42747	0	0	2
5.02511	0	0	0.836246	2
0	0.605907	0.438311	0	2
1.5086	5.75888	0	0	2
4.87487	5.90382	0	0	2
2.29323	0	0	0.676956	2
1.12103	2.61419	0	0	2
3.33975	0	0	1.32016	2
2.78187	0.484959	0	0	2
4.63814	0	0	0.182884	2
2.03597	4.1017	0	0	2
0	0	3.12467	1.59904	2
2.69683	3.26152	0	0	2
0.827569	3.3498	0	0	2
2.7141	1.01977	0	0	2
2.32451	3.2585	0	0	2
1.87741	0.693181	0	0	2
0.643837	0	0	1.25912	2
2.53338	5.66752	0	0	2
0	5.15692	1.96368	0	2
2.09629	0	0	1.24487	2
0.0210133	0	0.084915	0.884037	2
4.87733	0	0	3.26099	2
7.78667	1.34954	0	0	2
0	1.52179	1.61893	0	2
2.55226	1.23736	0	0	2
3.19688	1.4919	0	0	2
5.45608	1.29234	0	0	2
2.55006	1.85368	0	0	2
3.04428	3.21734	0	0	2
0.133485	0.279108	0	0	2
3.96403	6.46539	0	0	2
0.76595	0.287968	0	0.17012	2
3.2517	1.79982	0	0	2
1.31365	1.35781	0	0	2
2.46112	0.242007	0	0	2
1.97335	3.18155	0	0	2
2.3556	0	0	0.303339	2
2.72815	1.48357	0	0	2
0	1.62652	0.798675	0	2
2.04167	4.66527	0	0	2
2.44019	1.26463	0	0	2
3.53712	0	0	0.717461	2
3.25322	0	0	3.41859	2
1.81411	0	0	2.49195	2
1.04615	2.48999	0	0	2
5.43001	1.13372	0	0	2
4.09918	1.52325	0	0	2
1.99166	2.36318	0	0	2
3.39239	1.36538	0	0	2
5.72161	0	0	1.13483	2
0	0	0.428862	0.29343	2
4.03659	3.41183	0	0	2
0.849714	0	0	1.753	2
4.03815	3.66416	0	0	2
4.28697	3.1146	0	0	2
0.331099	3.48211	0.0215019	0	3
0	2.61897	0.506748	0	3
0	0	0.19057	0.165547	3
1.85467	2.29019	0	0	3
5.73832	1.42415	0	0	3
1.78062	1.02352	0	0	3
1.05595	0	0	2.01356	3
3.7352	0	0	0.778774	3
0	1.17952	1.53242	0	3
1.30627	2.95799	0	0	3
1.31802	2.20356	0	0	3
2.72199	2.26975	0	0	3
0.92681	0	0	1.53533	3
0.500408	0	0	0.526347	3
0.000136036	4.38968	0.0472159	0	3
0	1.3046	1.45929	0	3
0	0.480328	0.166896	0	3
1.26873	1.7572	0	0	3
0	0.748767	1.64705	0	3
3.191	0	0	1.25172	3
2.63729	3.44178	0	0	3
0	1.33178	0.964415	0	3
4.08698	0.276516	0	0	3
1.64998	2.76397	0	0	3
1.82402	0.386096	0	0	3
2.25356	0	0	1.18035	3
0.331261	0.992333	0	0	3
0.791732	0.377653	0	0	3
0.41886	0.389177	0	0	3
0	1.28885	1.94951	0	3
0.391521	0	0	1.13451	3
0.124476	0	0	0.500085	3
3.46107	2.95094	0	0	3
1.2594	0	0	1.14751	3
0	3.33281	1.34479	0	3
1.07367	2.07974	0	0	3
0	0	2.5574	0.416838	3
1.02676	1.57964	0	0	3
0	2.72478	0.336889	0	3
1.62099	0.829534	0	0	3
0	0	2.0099	5.10068	3
3.25676	0.861084	0	0	3
2.25891	0	0	1.05791	3
0.732647	3.75074	0	0	3
0.594658	0	0	0.18355	3
4.35934	2.84455	0	0	3
0.12022	2.07547	0	0	3
0.148296	0	0	2.15387	3
0	0.563806	0.442355	0	3
0.606241	0.144687	0	0	3
0.197569	1.43199	0.155733	0	3
0.606475	0	0	1.25366	3
0	2.47853	0.259639	0	3
0	3.98897	1.76713	0	3
4.2252	3.54409	0	0	3
0.899456	1.03875	0	0	3
1.72522	0.673133	0	0	3
0	0.118863	0.481951	0.35048	3
1.128	3.88195	0	0	3
6.05088	1.77392	0	0	3
0	0	1.50767	0.328307	3
0	2.58622	1.68182	0	3
2.67525	1.26774	0	0	3
3.50852	1.70134	0	0	3
6.31738	0	0	1.01495	3
0	0.0821771	3.73318	0.0216679	3
0	1.10903	1.36242	0	3
0	0.81067	0.524374	0	3
1.7913	0.79271	0	0	3
0.555339	0.934293	0	0	3
2.14761	5.22377	0	0	3
2.67128	0	0	2.97509	3
0	1.08719	1.77863	0	3
0	0	1.03496	0.875022	3
2.45824	3.35193	0	0	3
1.16079	2.1181	0	0	3
0	1.19118	1.96238	0	3
0	1.46587	0.383572	0	3
0	0	2.31574	1.67472	3
0	3.39931	3.57532	0	3
0	0	0.959281	2.66365	3
1.23545	0.291763	0	0	3
3.11451	0	0	3.03185	3
0	2.69336	0.213749	0	3
1.02231	2.69619	0	0	3
0	1.26931	4.32685	0	3
3.30889	1.25693	0	0	3
2.48655	2.56315	0	0	3
0	0	4.15225	0.525991	3
0	0.412278	0.596776	0.49686	3
0.582551	2.89626	0	0	3
0	0.865843	2.35535	0	3
0.554358	0	0	1.49378	3
0	3.37585	2.88957	0	3
1.14441	0	0	4.56215	3
0	0	2.43154	1.88163	3
0	0	0.870381	2.72368	3
0	0.963986	2.3255	0	3
3.47515	5.74196	0	0	3
0	0.566906	2.16803	0	3
1.26868	1.43724	0	0	3
2.83528	4.02458	0	0	3
1.91494	3.48253	0	0	3
2.15089	0	0	0.179617	3
0	0.654957	0.479268	0	3
2.85494	0	0	0.836624	3
0	0	1.06444	3.22751	3
0	0	3.36394	3.01648	3
0.367943	3.38126	0	0	3
0.181393	0.740238	0.11821	0	3
0	0	0.324348	0.754175	3
0	2.60846	1.00864	0	3
0.282296	0	0	2.04544	3
2.39155	0	0	0.0775402	3
0	0	2.4441	1.30513	3
0.0417355	1.60243	0	0	3
6.50051	2.43003	0	0	3
0.709358	0	0	0.241035	3
0.381666	1.26886	0	0	3
2.11332	0	0	0.472781	3
0	1.17163	1.50034	0	3
0.997146	0	0	0.191258	3
1.75796	0	0	2.50768	3
0	0.19409	2.36283	0	3
2.5109	2.23591	0	0	3
0	0.0660574	1.76963	0.13483	3
1.43381	0.541063	0	0	3
1.38617	2.54437	0	0	3
0.103113	0	0	1.66815	3
1.8941	1.24165	0	0	3
0	0.53576	0.500918	0	3
2.54033	0	0	4.35628	3
0	0.80136	4.59636	0	3
0	2.65797	1.67838	0	3
2.93221	2.58564	0	0	3
1.3556	3.98422	0	0	3
2.45576	2.58016	0	0	3
0	0	0.230884	0.324746	3
0	2.92826	1.4675	0	3
0	1.54345	1.16089	0	3
0	1.27674	0.38835	0	3
1.64183	0	0	1.79087	3
2.73446	0	0	0.256254	3
0.912781	4.20468	0	0	3
0	0	3.35799	0.649655	3
1.16501	3.64174	0	0	3
4.46556	1.32534	0	0	3
0	2.17636	2.4621	0	3
1.57621	3.26884	0	0	3
0.911487	2.15493	0	0	3
0	0	4.16162	1.87126	3
1.77648	2.50782	0	0	3
2.21888	0.397821	0	0	3
0	1.56517	4.09905	0	3
0	0	0.45979	0.961271	3
1.29897	4.97543	0	0	3
2.41015	0	0	0.0770176	3
0.253514	2.57977	0	0	3
3.24535	3.62301	0	0	3
3.30692	0	0	0.619979	3
0.614213	0	0	1.55565	3
0	0	0.43576	3.23968	3
1.96513	4.70843	0	0	3
1.18326	0.0400815	0	0.00599018	3
0	0	2.85087	1.37891	3
4.21432	1.21162	0	0	3
1.03586	2.67717	0	0	3
0.470453	0.813013	0	0	3
0.563387	3.9249	0	0	3
1.08583	2.40663	0	0	3
0.740891	1.54946	0	0	3
0	0.940668	1.40143	0	3
0.781159	1.80346	0	0	3
1.08915	0	0	1.55675	3
0	0	0.33944	1.83091	3
0	0	1.69142	1.67075	3
0	1.54314	1.7168	0	3
2.41482	3.55896	0	0	3
0	0	0.803098	1.75059	3
0	0	2.02426	1.23743	3
0	2.25613	3.79456	0	3
0	1.41441	2.18909	0	3
1.83111	1.50621	0	0	3
1.03603	3.20417	0	0	3
3.11167	3.97556	0	0	3
5.53933	1.38331	0	0	3
1.37598	1.5598	0	0	3
0	2.5082	0.653195	0	3
0	2.41249	1.12846	0	3
0	0	0.953127	2.24462	3
1.49572	0	0	0.976841	3
0	0.129179	2.04167	0	3
0	0	2.40564	2.52131	3
0	0.223963	2.96283	0.333102	3
0.0715481	3.24507	0	0	3
0.0741973	2.1123	0.164396	0	3
1.41952	0.794122	0	0	3
4.48868	1.64007	0	0	3
1.13391	0.024472	0	0.117112	3
0	0.4833	4.8764	0	3
1.29214	1.04658	0	0	3
0	0.480541	3.14488	0.318093	3
0	2.13267	3.14797	0	3
0	0	3.86864	1.20259	3
0	0.597255	0.332968	0	3
0	1.38744	1.61212	0	3
0	0	0.875039	1.54018	3
0	0.983116	1.72331	0	3
0	0	1.12674	1.83557	3
1.98186	1.34518	0	0	3
0.426741	4.2454	0	0	3
0.381525	0	0	2.37549	3
0	0	1.40371	0.276947	3
0	1.00705	1.28059	0	3
0.308338	0	0	3.61291	3
0	2.33141	3.0987	0	3
1.77146	0	0	3.75853	3
1.3155	0	0	0.92427	3
3.90772	0	0	0.156607	3
3.79035	0	0	1.08359	3
3.72105	0.58799	0	0	3
0	2.18838	0.43618	0	3
4.58952	0	0	1.58457	3
2.45531	0	0	0.410344	3
0.142878	1.4156	0	0	3
0	2.71839	1.09477	0	3
1.06143	0	0	2.308	3
0.93542	0	0	3.49633	3
0	0	2.92337	2.47758	3
1.64364	0.502195	0	0.104971	3
0	0	1.84867	1.06029	3
0.996626	0	0	0.972523	3
0.311799	3.74585	0	0	3
0	2.19756	1.2891	0	3
0	0.506853	0.515107	0	3
0.778726	0.3118	0	0	3
0.374038	0.289118	0	0	3
1.13727	0.975387	0	0	3
1.99895	0	0	0.114161	3
0	0.837318	2.2713	0	3
0	0	0.530103	1.64602	3
2.2793	0.299627	0	0.0574851	3
3.61948	0	0	1.91502	3
0	0.943973	0.589031	0	3
0.63151	0	0	1.11251	3
2.17329	0.835235	0	0	3
0.374584	1.5242	0	0	3
0.0659417	0.00843506	0.091883	0.0198035	3
3.92368	2.99398	0	0	3
0	0.633668	0.952414	0	3
0	0	3.42349	0.875175	3
2.30298	0.866636	0	0	3
2.72611	1.98811	0	0	3
2.43322	0.114938	0	0	3
0	0	1.31441	2.13374	3
0.750892	1.97293	0	0	3
2.71218	0	0	0.207332	3
0	0.654047	4.69595	0	3
2.11644	1.59186	0	0	3
0.88156	0.7014	0	0	3
4.63573	4.75441	0	0	3
1.92648	2.85485	0	0	3
1.1236	0.930863	0	0	3
0	0.709051	0.516573	0	3
1.03416	0	0	2.34553	3
4.1872	6.69578	0	0	3
0	0	1.33074	0.859285	3
0	2.98492	0.431019	0	3
0.721739	0.426686	0	0	3
0.168512	0.957059	0	0	3
0.376442	0	0	0.785279	3
1.0338	1.61526	0	0	3
0	1.3897	0.967403	0	3
0	1.3073	4.02743	0	3
0.870837	0	0	1.69185	3
0	0	0.72991	1.34708	3
1.2813	0	0	2.14005	3
3.3947	0	0	0.453395	3
0.034827	1.29611	0.0884077	0	3
0	0.998909	0.875078	0	3
2.61648	4.31437	0	0	3
1.09805	0.569454	0	0	3
0.514047	2.34446	0.13345	0	3
3.11374	2.33066	0	0	3
4.34588	1.96448	0	0	3
1.21332	3.83294	0	0	3
2.80093	0	0	0.874812	3
0	2.09836	2.67415	0	3
0	2.94145	1.80427	0	3
0.525499	0	0	0.964838	3
1.94445	0	0	0.700083	3
0.280632	0.0528779	0	0.0938479	3
2.94533	0	0	1.92894	3
0	2.9538	3.59443	0	3
3.89395	0.556759	0	0	3
2.14513	1.1051	0	0.0641648	3
0	1.30586	4.78688	0	3
3.79905	0	0	1.11932	3
0.766702	0.112584	0	0.0346472	3
4.58147	0.68038	0	0	3
0	0	0.850231	1.10345	3
0	3.02532	0.722585	0	3
0.580064	0	0	3.71644	3
0	0.614013	1.69327	0	3
0	0	1.74343	0.356806	3
1.88765	3.17999	0	0	3
3.04478	1.50246	0	0	3
0	0.242974	2.31138	0	3
3.63304	3.17537	0	0	3
0	0.148704	1.35384	0	3
0	0.571697	0.986161	0	3
3.44316	0	0	0.1681	3
1.07099	3.45762	0	0	3
2.05968	0	0	4.11331	3
1.35885	1.82771	0	0	3
3.56529	2.78284	0	0	3
0	0	1.4039	0.758507	3
1.44226	1.32063	0	0	3
0	3.48079	3.83578	0	3
0.643463	0.120359	0	0.0497036	3
0.620847	2.3037	0	0	3
0	0.0598948	0.935675	0.367074	3
0	3.96511	2.00344	0	3
2.83199	3.58637	0	0	3
0.966964	0.0913867	0	0	3
0	0	0.572098	2.05153	3
2.96911	0	0	1.6606	3
0	0.0320817	3.1572	0	3
0	0.577082	0.502458	0	3
4.71478	0.196387	0	0	3
0	0.271918	0.83614	0	3
0.370646	0.0536712	0	0.0449761	3
0.0222656	4.53415	0.176231	0	3
0.118944	1.02628	0	0	3
0	1.88982	3.15659	0	3
0	1.0664	1.32219	0	3
0	3.00843	0.908552	0	3
1.73976	0.695438	0	0	3
2.61238	0.748272	0	0	3
0	0.00551127	2.96515	0.0437503	3
2.86656	0.1461	0	0.0210963	3
0.0549616	0	0.0682168	1.01471	3
0.270784	1.14632	0	0	3
2.02542	0	0	0.330626	3
0	0	1.05825	0.472398	3
0.0506518	1.84145	0.0674083	0	3
0.150063	0	0	0.414031	3
0	0	0.0443789	1.54154	3
0.0769244	1.35122	0.281986	0	3
8.6879	2.86033	0	0	3
1.83941	1.57386	0	0	3
0.712167	0	0	1.89855	3
2.16108	2.22772	0	0	3
2.25631	1.28047	0	0	3
0	3.13524	1.90406	0	3
0.356317	1.87538	0	0	3
0	0	1.19146	1.77805	3
0.36479	0.855721	0	0	3
0	0	1.67292	0.630696	3
2.41581	1.78632	0	0	3
1.56606	2.43724	0	0	3
0	2.07055	3.07393	0	3
4.78373	0	0	0.860705	3
0.0715129	0.638266	0.0105338	0	3
0	1.31953	0.806803	0	3
0.436082	0	0	0.946886	3
1.44811	0.207588	0	0	3
1.15364	2.48719	0	0	3
0.598045	3.62015	0	0	3
0	0	2.68071	4.18488	3
0.666679	2.32542	0	0	3
0	0.689603	2.53738	0	3
0	0	1.71987	3.7633	3
0	4.43093	0.408188	0	3
0	3.96102	0.823287	0	3
0	0.430144	2.95088	0	3
4.9026	3.311	0	0	3
0	0.501435	0.445358	0	3
0.221003	0	0	3.3971	3
0.696571	0.100305	0	0.015302	3
1.5427	0	0	0.381864	3
0	0	0.325962	0.600051	3
0	0	2.44174	1.10075	3
0.658922	0	0	0.234293	3
0.75824	0.491379	0	0	3
0.884864	0.769685	0	0	3
0	0.395502	4.9815	0	3
0.313223	0	0	0.724192	3
0	0	3.13712	1.79655	3
0	0	0.885055	0.121338	3
0	2.29931	3.29913	0	3
4.92666	2.02418	0	0	3
0.334485	2.4275	0	0	3
2.09554	0	0	0.357514	3
0	3.82276	1.42707	0	3
0.245484	4.30348	0	0	3
0.986317	0	0	0.353155	3
1.34929	0.451363	0	1.10712	3
4.11482	0.997656	0	0	3
0.798392	2.10374	0	0	3
0.505597	0.901531	0	0	3
0.854195	0	0	0.840415	3
0	0	0.584083	0.306082	3
1.83689	0	0	0.797929	3
1.19977	2.42066	0	0	3
0	0	3.83262	0.118764	3
2.1951	2.36028	0	0	3
0.141735	0	0.0906276	1.5533	3
0	0	0.912946	1.54847	3
0	1.58846	2.3302	0	3
1.13762	0.947855	0	0	3
0	0.37193	1.68718	0	3
0	0.728574	0.696056	0	3
0.572824	2.27005	0	0	3
0	0	2.31685	0.97068	3
0.355692	0	0	2.47978	3
0.713942	0.507642	0	0	3
0	0	2.54092	2.12881	3
0.310705	2.18008	0	0	3
0.0725768	0.173747	0	0.196878	3
0.909203	0.97174	0	0	3
0	0.697827	3.92286	0	3
0	0	1.41349	4.52626	3
0	2.38495	0.660089	0	3
0	0	3.47008	2.19791	3
2.34417	0	0	0.985758	3
0	1.62836	2.5963	0	3
0	0	5.00454	0.363882	3
2.65811	3.65146	0	0	3
0.494982	0.617257	0	0	3
5.95135	1.59103	0	0	3
3.43654	0	0	2.39973	3
1.44247	3.29823	0	0	3
1.99504	2.42152	0	0	3
0.623351	0	0	2.04004	3
0	0.00148734	1.82046	0.110618	3
4.41326	1.73132	0	0	3
0	0	2.28789	3.20908	3
0	0.912312	1.75729	0	3
7.63719	1.14047	0	0	3
0	0	2.97137	4.65392	3
3.46995	1.54747	0	0	3
0.412845	1.28943	0	0	3
2.94596	4.47347	0	0	3
0.842697	0.585523	0	0	3
0	3.80191	1.12577	0	3
0.335482	0	0	2.8792	3
0.46895	0	0	1.76011	3
4.12115	2.5564	0	0	3
4.17889	2.66209	0	0	3
0	0	2.55556	0.536031	3
0	0	2.79088	0.800769	3
0.419405	0	0	1.97719	3
3.07051	0.524138	0	0	3
2.55629	0	0	1.70508	3
2.55181	0	0	0.983557	3
0.889941	0.248865	0	0	3
2.50236	0.210624	0	0	3
1.2227	0.144208	0	0.0114265	3
2.21677	0	0	0.393448	3
0	2.84684	3.34252	0	3
0	2.90324	0.147559	0	3
2.582	0	0	0.715186	3
0	0	0.592256	3.07272	3
2.7011	0.54591	0	0	3
1.63774	0	0	0.985727	3
0	1.17079	0.586996	0	3
2.09489	0.35883	0	0	3
0	4.24267	0.388205	0	3
3.13715	1.4837	0	0	3
0.176255	0	0	0.874692	3
0	0	1.45623	0.175347	3
0	4.70038	1.63778	0	3
0	0	2.47585	1.8123	3
2.36159	0	0	1.14678	3
0	1.01821	3.83528	0	3
0.263355	0	0	1.26659	3
0	0.513209	3.07021	0	3
0	3.41087	1.71643	0	3
3.07749	0	0	1.55479	3
1.10232	2.26616	0	0	3
2.45788	1.75063	0	0	3
0.783133	1.79541	0	0	3
0	2.95218	1.80748	0	3
5.51914	0.0666606	0	0.0017981	3
0	1.40383	2.11759	0	3
0	0.608731	1.04655	0	3
0	0	3.45517	2.66574	3
0.839643	0	0	2.00373	3
0	1.27192	1.99108	0	3
5.90441	1.70377	0	0	3
2.4488	0.127441	0	0	3
1.52907	2.13879	0	0	3
0	0	3.69397	2.07755	3
1.69587	2.49605	0	0	3
0.0303655	3.01211	0.00625352	0	3
0	0	0.655808	2.61496	3
0.605828	6.05714	0	0	3
0.205691	1.75216	0	0	3
0.344129	2.14019	0	0	3
0.744731	0	0	1.82036	4
2.64613	0	0	0.658077	4
3.74511	0	0	0.633805	4
0	0.580417	1.24854	0	4
0	0.610299	1.18885	0	4
1.46787	0	0	2.03275	4
1.46794	0	0	4.1547	4
0	0	0.312307	0.561867	4
0.50315	0	0	1.71848	4
0	0	0.906483	0.142271	4
0	0	1.58265	2.76879	4
1.54138	0	0	2.28969	4
0	0	2.78307	3.36017	4
0	0.694712	2.72342	0	4
1.42215	0.595366	0	0	4
0.362148	0	0	0.169937	4
0	1.23135	1.28062	0	4
1.60153	0	0	3.15512	4
1.72243	0	0	0.477528	4
0.0742244	0.427277	0.00169041	0	4
0.556059	0	0	2.00152	4
0	0.283051	0.971131	0	4
2.27528	0	0	0.917714	4
0.0967646	0	0.129972	0.397538	4
0	1.5122	0.772768	0	4
0	0	0.963848	1.21575	4
2.44548	0	0	0.572799	4
1.83611	0	0	1.18156	4
0.0872721	0	0.0342267	3.81677	4
1.48615	0.601447	0	0	4
0	0	0.923834	2.67829	4
0.759178	0.247514	0	0	4
0	0	1.217	5.37671	4
3.33926	0	0	3.3795	4
0	2.49441	0.229386	0	4
0	0.163646	2.22181	0.0207067	4
1.50314	0	0	1.40339	4
4.27052	0	0	1.85831	4
0	0	2.45752	1.41743	4
0.213835	0	0	2.24641	4
1.7426	0	0	1.09052	4
0.80063	0	0	2.61501	4
2.11268	0	0	1.59895	4
1.22334	0	0	2.61209	4
0	0	4.4489	1.12499	4
0	0.689631	0.249293	0	4
0.728926	0.656833	0	0	4
1.84266	2.91404	0	0	4
0	0	1.18394	1.21702	4
0	0.0807071	0.243173	0	4
0.675289	0	0	1.91703	4
0	0	2.9429	3.64937	4
2.08973	0	0	4.22794	4
0	0.639268	2.78157	0	4
1.15548	0	0	1.04047	4
0	0	2.15929	2.9326	4
0	0	0.896748	1.61404	4
1.01211	0	0	1.31848	4
0	0	0.116996	4.43182	4
0.63963	0	0	0.933602	4
0	0	0.837896	1.53763	4
0	0	0.288044	1.60167	4
0	0	1.69311	0.442045	4
1.5351	0	0	1.90924	4
1.03674	0.237928	0	0	4
0.686066	0	0	2.70822	4
0.992552	0	0	2.05942	4
0	0	1.42052	2.74986	4
0	0	0.930696	1.71243	4
3.76583	0	0	2.09211	4
2.18076	0	0	1.036	4
0	0	0.486005	3.11476	4
0	0	0.054376	2.71832	4
0	0	1.79906	2.81482	4
0	0	2.60862	3.7809	4
0.545197	0	0	1.24194	4
0	0	0.600923	1.56395	4
0.326833	0	0	3.34994	4
2.27571	0	0	1.19151	4
2.03249	0	0	0.808526	4
2.76128	0	0	2.15134	4
1.27214	0	0	3.18198	4
1.01142	0	0	2.42385	4
0.816217	0	0	1.34826	4
0.046502	0	0.0133633	1.1918	4
0.185537	0	0	1.04856	4
0.330248	1.84316	0	0	4
0.678948	0.734206	0	0	4
2.84676	0.410772	0	0	4
1.83624	0	0	3.86958	4
0	0	0.741709	2.32877	4
0.884447	1.04257	0	0	4
0	0	0.320846	0.166502	4
0.607876	2.08375	0	0	4
1.70141	0	0	0.450113	4
0	0	0.115707	1.01278	4
1.50609	0.900942	0	0	4
0	0.44068	0.299351	0	4
0.370704	0	0	0.764338	4
0	0.541131	0.960676	0	4
1.65241	0	0	1.2338	4
1.01229	0	0	2.90602	4
1.2794	0	0	0.873696	4
0	0	0.908078	0.451509	4
1.431	0	0	1.4342	4
3.02232	0	0	2.23366	4
1.01981	0	0	0.517516	4
1.67382	1.63311	0	0	4
0.4116	0	0	1.80616	4
0	2.02834	1.02956	0	4
3.01268	0	0	0.318103	4
0	0	1.37699	2.61391	4
0	0.423692	1.88172	0	4
0.356316	0	0.100412	1.04927	4
2.40211	0	0	0.90396	4
0	0	1.87622	2.57073	4
0	0	0.0135355	2.51349	4
1.19579	0	0	0.972342	4
0.0614586	0	0.0282365	2.28725	4
2.18385	0	0	3.70475	4
0	0	0.873075	1.46407	4
0	0	2.92221	3.0932	4
0.693886	0	0	1.12352	4
1.1197	0	0	3.72884	4
0	0.388226	0.0962613	0	4
0	0	2.90977	1.37338	4
1.33493	0	0	2.05333	4
0.49197	0	0	1.37469	4
1.20544	0	0	2.99463	4
0	0	2.65337	0.138592	4
0.988189	0	0	2.41412	4
1.17361	0	0	0.345261	4
0.413692	0	0	1.45162	4
0.127325	0	0	2.28445	4
0	0	3.16914	1.5257	4
0	0	0.567624	1.12049	4
1.38757	0	0	2.0686	4
1.14811	0	0	4.72288	4
2.33667	0.25398	0	0	4
0.588424	1.04588	0	0	4
0	0.0395709	0.190283	0.211253	4
0	0	1.6601	6.35518	4
0.327498	0	0	0.87459	4
1.61029	2.74072	0	0	4
1.52905	0	0	0.731793	4
0.540794	0	0	2.65187	4
1.8112	0	0	0.881758	4
2.82496	0	0	0.242925	4
0.863219	0	0	3.01578	4
1.55305	2.04527	0	0	4
3.44616	0	0	2.12358	4
0.167307	0	0	0.331549	4
0	0	1.27859	3.44086	4
1.30988	0.391532	0	0	4
1.91146	0.995248	0	0	4
2.23131	0.491767	0	0	4
0	0	1.74877	1.10644	4
0.365902	0	0	1.00038	4
0	0.267935	0.795502	0	4
0	0.585608	0.90791	0	4
0.969011	0.107478	0	0.251188	4
0	0	0.243969	0.539655	4
0	0	1.38168	0.547039	4
2.66696	0	0	1.64064	4
0	0	0.790585	1.82101	4
0	0.11255	0.812463	0.0611777	4
0	0	0.980609	2.0218	4
0	0	3.19878	2.02792	4
1.32458	0	0	1.2816	4
0	0	0.259024	3.62122	4
0.48059	0.656797	0	0	4
0.954656	0	0	0.477151	4
3.05596	0	0	0.225467	4
0	1.79644	1.0917	0	4
2.55487	0	0	1.37134	4
0.455645	0.516737	0	0	4
0.138276	0.293611	0	0	4
1.62449	0	0	1.06195	4
0	1.21354	1.02023	0	4
0	0.05642	1.50275	0.222154	4
2.62705	0	0	1.35003	4
0	0	1.20329	2.8172	4
0	0	0.825794	0.343825	4
1.67541	0	0	3.9827	4
0	0	0.202563	0.0696481	4
0.271498	0.259002	0	0	4
0	0	0.921486	1.56378	4
2.57076	0	0	1.09691	4
0.439397	0	0	0.81723	4
0.133476	0	0	0.231494	4
1.12325	0	0	0.847376	4
1.74383	4.21695	0	0	4
0.347141	0	0	1.3995	4
0	0	0.4164	0.8732	4
0.0194135	0.823843	0.0857823	0	4
1.59768	0.132423	0	0	4
1.23094	0	0	2.50223	4
1.41591	1.04585	0	0	4
1.03258	0	0	3.01528	4
0.69049	0	0	1.81393	4
0	0	1.70248	0.201621	4
0	0.680796	0.711924	0	4
0	0.626759	1.65994	0	4
0	0	0.462778	0.697312	4
2.05064	0	0	0.774084	4
1.9619	0.0683344	0	0.0888417	4
0	0	2.30358	2.16151	4
3.67916	0	0	0.678142	4
0	0	0.782256	1.59757	4
1.79047	0	0	1.37806	4
1.42157	0	0	4.83051	4
1.69634	0.26092	0	0.473484	4
0	0.0839001	0.303289	0.0581295	4
0	0	1.08777	0.966003	4
0	0	1.30904	0.472784	4
0	0	4.54762	1.7165	4
0	0	1.90538	2.10037	4
0	0	0.607931	1.29421	4
3.8018	0.785748	0	0	4
0	0	0.653016	0.768343	4
0	0	1.38514	0.875205	4
2.08855	0	0	3.03688	4
0	0	1.43761	2.20065	4
2.46954	0	0	2.89599	4
2.96879	0	0	2.02236	4
0	0	0.854994	2.2758	4
3.79221	1.0785	0	0	4
0.547826	0	0	2.29802	4
0.142583	0	0.149563	0.438786	4
0	0	0.13626	1.47013	4
0	0	0.0746709	3.59739	4
0	0	1.32208	1.98998	4
1.05838	0	0	1.49727	4
0	0	0.0455536	2.99261	4
0	0	2.44165	1.7844	4
0.252556	1.52231	0	0	4
1.20386	0	0	3.69671	4
0.568555	0	0	1.61172	4
0.363413	0	0	3.16338	4
0.353681	0	0	0.416033	4
2.84569	0	0	0.934155	4
0	0	0.170497	0.533802	4
0.304203	0	0	2.24289	4
1.04866	0	0	2.27911	4
0	0	2.30176	1.98792	4
0.178908	0	0	2.25628	4
0.815719	0	0	0.855445	4
0.941902	0	0	3.88097	4
0.599465	0	0	1.73891	4
0	0.594657	0.22819	0	4
0	0	2.06278	1.65891	4
2.03169	1.23878	0	0	4
0	0	1.23257	3.65162	4
1.78788	0	0	3.12874	4
0	0	1.7691	4.33538	4
0.341926	0	0	4.32359	4
0	0	1.99388	1.87641	4
2.25718	1.73013	0	0	4
1.39492	0	0	1.23674	4
0	0	0.265823	0.902963	4
0	0	0.459397	3.04589	4
0	0	3.00993	4.06105	4
0	0	1.02716	0.182486	4
2.67807	0.986563	0	0	4
0.0827563	0	0	0.282022	4
0	0	0.269919	0.656644	4
1.31507	0	0	0.724467	4
1.42298	1.39295	0	0	4
0.299968	0	0	3.50211	4
0	1.8265	0.558978	0	4
0	0	2.18948	1.38921	4
0	0	0.332423	2.97062	4
0	0	0.331031	1.39744	4
0	0	1.76185	1.46565	4
0.661154	0.0627471	0	0.0338561	4
0	1.12826	0.431618	0	4
0	0	0.728925	1.88341	4
1.58786	0	0	3.58304	4
0.339537	0	0	0.446606	4
0.0469106	0	0.07696	4.01085	4
2.21423	0.281862	0	0.19685	4
2.96345	0	0	2.26964	4
0	0	2.2442	0.261078	4
0	0	0.302834	0.842861	4
0	0	0.47552	3.00271	4
0	0.199642	0.0897639	0	4
0.455908	0	0	0.898086	4
0	0	1.4791	1.81955	4
0	0	1.08375	3.27937	4
0.615015	0	0	2.65257	4
0	0	0.558475	4.20096	4
0	0	1.94192	1.64874	4
0.149212	0	0	1.8815	4
2.88303	1.20294	0	0	4
2.25935	0	0	0.708922	4
1.49304	0.353732	0	0.171891	4
0	0	4.9171	3.36116	4
0.124675	0	0	0.851697	4
0.362244	0.895005	0	0	4
0	0	0.944585	2.46045	4
1.27896	0	0	0.901513	4
1.34596	0	0	1.34795	4
2.34892	0	0	5.46569	4
1.06536	0.896946	0	0	4
0	0	0.567398	1.9838	4
0.275051	0	0	1.66982	4
1.04497	1.76977	0	0	4
0	0	0.617833	0.416266	4
0	0	1.25595	0.351373	4
0.487649	0	0	1.02575	4
3.27315	0	0	0.490422	4
0.759554	0.918207	0	0	4
0	0	1.2386	1.41035	4
0.963706	0	0	0.857255	4
0.658064	0	0	2.38743	4
0	0	0.397245	3.83665	4
0	0	1.74555	4.14759	4
0.67	2.14949	0	0	4
1.03261	0	0	1.43915	4
0	0	0.591642	2.25442	4
1.28462	0	0	0.0322656	4
0	0	1.63061	1.63392	4
0	2.4012	0.0968958	0	4
1.3798	0	0	2.84873	4
3.65242	0	0	1.07688	4
0	0.729855	0.055269	0	4
1.52604	0	0	1.31169	4
0	0.790113	0.531805	0	4
0.320948	0.0901307	0	0.0244023	4
0	0	1.43415	2.00447	4
0	0	0.443836	1.8244	4
0.0804027	0.39381	0.0872691	0	4
1.6934	0	0	2.07747	4
0.934222	0	0	2.38885	4
1.33703	0	0	1.73318	4
1.7463	0	0	1.62811	4
1.53111	0	0	0.760542	4
1.26335	0	0	0.470425	4
0	0	1.43932	0.978357	4
0	0.56789	2.65725	0	4
0	2.26327	3.13023	0	4
0	0.876287	2.34035	0	4
1.53659	0	0	3.41329	4
0	0	1.86373	2.86303	4
3.1391	0.219397	0	0	4
0	0	2.06323	1.1946	4
0.471436	2.04696	0	0	4
1.42472	0	0	2.39174	4
2.77922	0	0	1.92285	4
2.12554	0.429748	0	0	4
0.0418172	1.84158	0.158274	0	4
2.29367	0	0	2.4497	4
1.79787	0	0	1.77799	4
2.83766	0	0	2.30622	4
2.40551	0	0	2.91285	4
0.540887	0	0	3.23589	4
0	0	2.81453	0.230911	4
0	0	3.16902	3.49545	4
0	0	1.01266	1.95385	4
3.01172	0	0	2.55888	4
1.86658	0	0	3.01412	4
0	0	1.10925	2.01094	4
3.12233	0	0	0.916191	4
1.2135	0	0	1.71973	4
0.593969	0	0	3.05833	4
0	0	1.10439	1.05067	4
0.903875	2.21063	0	0	4
0.0375082	0	0.281891	2.04699	4
0	0	0.770945	1.72444	4
0	0	1.30423	2.04971	4
0	0	0.91332	3.89465	4
0	0	0.775041	2.21221	4
0	0.147335	0.815406	0	4
0	0	3.89129	1.42472	4
3.02345	0	0	0.431462	4
0.409597	0	0	3.81796	4
0	0	0.0936953	0.496447	4
1.16858	0	0	5.08526	4
0	0	0.78931	1.77886	4
0	0	0.594969	1.85932	4
0	0	1.26959	2.86837	4
0.481355	0	0	1.58569	4
0.00377334	0.803103	0.0666859	0	4
0	0	0.305974	2.34174	4
1.98261	0	0	0.45253	4
1.2015	1.47731	0	0	4
0.767104	0	0	2.24466	4
0.809752	0	0	2.89997	4
0	0	2.95297	1.50112	4
0	0	0.273343	0.259785	4
0.46533	0	0	1.432	4
0.0397329	0	0.22189	1.55829	4
0.47255	0	0	0.288859	4
1.30646	0	0	0.83311	4
0	0	0.651634	2.28909	4
1.65257	0	0	1.94365	4
0	0	0.215282	2.86301	4
0.388123	0	0	1.38807	4
0	0	1.41031	2.20135	4
0.780085	0	0	3.20905	4
0	0	0.80237	2.08519	4
0.829647	0	0	3.77532	4
1.35662	0	0	1.25663	4
1.94489	0	0	3.09145	4
2.42186	0	0	2.6072	4
0.193375	0	0.144533	2.53411	4
2.45139	0	0	0.44502	4
2.07016	0.0217021	0	0.0172373	4
1.58662	0	0	1.6656	4
0.300165	0	0	2.5199	4
0	0	1.22356	2.15695	4
0.746908	0.348746	0	0	4
1.78258	0	0	2.5881	4
0.0346565	0.366129	0	0	4
1.48919	0.937359	0	0	4
1.21637	0.265608	0	0	4
0	0	0.138984	2.41762	4
1.42316	0	0	2.06184	4
0.0666158	1.89539	0	0	4
0.908793	0	0	1.00954	4
0	0	0.487772	2.79104	4
0	0	0.610932	3.11478	4
0	0	2.27625	0.225555	4
1.91756	0	0	1.24077	4
5.83557	0.441836	0	0	4
0	0	0.66456	1.8427	4
2.8306	0.0332085	0	0.293519	4
0.165598	0	0	3.40226	4
0	0	1.11448	1.59846	4
0	0	1.51247	0.29272	4
0.795124	0	0	0.883242	4
0.794087	2.19633	0	0	4
0.248952	0	0	2.20132	4
0	0	0.805781	1.83083	4
0	0	1.47046	2.38803	4
2.88304	0	0	1.84375	4
1.19786	0	0	1.49075	4
0.726091	0.105444	0	0.323426	4
1.80227	1.52441	0	0	4
1.50687	0	0	1.32599	4
0	0.195255	0.875387	0.0083536	4
0	0	0.691124	1.96519	4
0	0	0.349636	2.47072	4
1.57688	1.67547	0	0	4
0.128224	1.15755	0.314191	0	4
1.20257	0	0	3.06797	4
1.30004	0.11619	0	0.106277	4
1.88829	0	0	0.330948	4
0	0	1.13381	2.97418	4
0.173778	0	0	3.59556	4
0.427678	0	0	2.72678	4
1.56895	0	0	0.401174	4
0.951433	0.346067	0	0	4
0	0.646764	1.30714	0	4
2.18192	0	0	3.59748	4
1.07704	0	0	0.845538	4
1.13959	0	0	3.98491	4
0	0	2.70811	1.4676	4
0	0	1.49609	2.78242	4
0	0	1.59967	0.911888	4
0	0	1.36412	1.20581	4
0.0334593	0	0.0227449	2.19064	4
0.42219	0	0	2.06408	4
0	0.967922	0.739931	0	4
0	0	0.0782594	1.81027	4
0.172983	0	0	3.34628	4
0.943009	0	0	3.33487	4
0	0	0.424523	2.54315	4
0	2.27784	0.98313	0	4
0.8825	0.0328265	0	0.0262868	4
1.72151	0.379463	0	0	4
0	0	1.5036	2.55599	4
3.52248	0	0	0.674758	4
0	0	0.571209	1.57086	4
0	0.0913645	0.596208	0.161746	4
1.82529	0.551472	0	0	4
0.437466	1.39901	0	0	4
2.87687	0	0	0.694579	4
0	0	1.31145	0.822804	4
0.341661	0	0	0.143478	4
0.494336	0.819668	0	0	4
0.211007	0	0	1.01763	4
1.88252	0	0	2.61828	4
2.03046	0	0	1.5026	4
0	0	0.672715	0.945559	4
2.18621	0	0	0.771679	4
0	1.84946	1.27282	0	4
0.0903038	0	0	3.78268	4
0	0.215447	1.78232	0	4
0	0	0.0833429	3.39524	4
1.953	0	0	1.29891	4
0	0	0.520185	2.04431	4
0	0.237604	0.639658	0	4
0.118428	1.06439	0.110716	0	4
0.100625	0	0	0.60324	4
2.8846	0.15501	0	0	4
0.16244	0	0.0880478	1.64282	4
0.713866	0.408851	0	0	4
1.49656	0	0	1.52028	4
[truncated: 501 more rows]

## Sheet: Fig. 3b
FAF pre	FAF post	AC pre	AC post	freq_band				Frequency bands
3.39819	1.22442	0	0	1				1. delta
8.63839	3.98282	0	0	1				2. theta
1.5023	0	0	0.105053	1				3. alpha
5.72433	2.95208	0	0	1				4. beta1
5.0342	5.07263	0	0	1				7. gamma2
1.16319	0	0	0.977369	1
3.69917	0	0	0.385072	1
7.47301	0	0	0.804947	1
4.33736	2.38581	0	0	1
8.38022	0	0	0.283721	1
6.70274	3.97574	0	0	1
3.51257	1.33138	0	0	1
8.9009	3.19449	0	0	1
5.64677	0.88765	0	0	1
5.17122	7.98518	0	0	1
3.15226	2.33559	0	0	1
5.65921	3.34094	0	0	1
3.66958	4.42141	0	0	1
3.66763	3.79973	0	0	1
6.40017	0.483369	0	0	1
4.41628	4.60329	0	0	1
9.03723	2.36685	0	0	1
6.32889	3.516	0	0	1
8.48488	0.0891536	0	0.107603	1
0	3.23191	0.207653	0	1
7.94329	3.01355	0	0	1
0.752019	2.0428	0	0	1
7.88846	2.47749	0	0	1
6.15281	3.67097	0	0	1
4.99177	2.21368	0	0	1
6.90319	3.48066	0	0	1
4.80433	2.49631	0	0	1
7.28111	2.45043	0	0	1
5.48928	3.46517	0	0	1
4.75922	6.19173	0	0	1
6.21713	3.80393	0	0	1
3.09636	1.01057	0	0	1
1.20774	5.32996	0	0	1
11.6283	8.01355	0	0	1
7.2871	3.71582	0	0	1
7.45135	3.7713	0	0	1
5.06703	3.798	0	0	1
8.86795	2.06275	0	0	1
7.74291	0.342691	0	0	1
4.3276	0	0	1.96257	1
0	0.617901	1.3199	0	1
5.60235	0	0	0.797734	1
4.04704	1.72103	0	0	1
6.8949	4.86881	0	0	1
3.44956	0	0	0.47812	1
3.42921	0	0	0.308814	1
6.44834	0.121498	0	0.238516	1
6.22484	1.70382	0	0	1
6.93445	4.20967	0	0	1
8.11717	1.91179	0	0	1
6.60248	4.17012	0	0	1
5.69083	3.86546	0	0	1
4.81566	0	0	1.43414	1
7.52049	1.13182	0	0	1
8.76279	0	0	0.542422	1
6.27454	1.69968	0	0	1
1.72362	1.98894	0	0	1
4.35953	7.93047	0	0	1
8.6128	3.55736	0	0	1
4.65566	3.28233	0	0	1
9.40666	0.905836	0	0	1
2.89395	1.30862	0	0	1
11.9629	3.94002	0	0	1
7.98661	4.11528	0	0	1
4.17582	3.11364	0	0	1
8.68275	2.99018	0	0	1
6.22918	4.94403	0	0	1
5.82307	7.22252	0	0	1
2.69222	1.321	0	0.296095	1
3.16787	5.38652	0	0	1
7.44624	2.22675	0	0	1
7.45677	0.87031	0	0	1
3.60892	5.27015	0	0	1
9.68499	0	0	0.690806	1
6.33026	0	0	0.90028	1
4.58854	1.35906	0	0	1
7.20585	5.75851	0	0	1
7.93209	0.668873	0	0	1
1.51152	0	0	1.65452	1
3.55853	4.02423	0	0	1
1.25023	2.49791	0	0	1
7.40622	0	0	4.08425	1
7.16415	3.93187	0	0	1
8.3217	0.843719	0	0	1
5.08586	5.65622	0	0	1
5.95498	6.13764	0	0	1
5.15033	1.90714	0	0	1
4.01298	0.361368	0	0	1
9.82249	2.64512	0	0	1
5.78182	4.69515	0	0	1
8.15814	0	0	2.25906	1
7.37755	8.13533	0	0	1
7.14167	2.22698	0	0	1
8.34269	0	0	0.36572	1
6.8305	0	0	0.421321	1
5.19768	6.97977	0	0	1
6.58988	2.04448	0	0	1
9.88358	0.603125	0	0	1
3.38391	2.19737	0	0	1
3.47306	2.60058	0	0	1
1.81569	0	0	0.948132	1
7.08926	0	0	0.92116	1
5.69139	3.42106	0	0	1
4.43633	2.48815	0	0	1
7.75921	0	0	2.1862	1
1.63417	0	0	1.56205	1
9.43149	2.61233	0	0	1
1.5758	2.21141	0	0	1
7.90527	0.461227	0	0	1
7.30534	5.94432	0	0	1
5.30457	4.05408	0	0	1
2.63224	1.54962	0	0	1
5.32005	1.78245	0	0	1
6.29574	6.59061	0	0	1
6.61897	4.54804	0	0	1
3.09018	3.60253	0	0	1
5.2494	1.42316	0	0	1
7.91546	2.05848	0	0	1
6.10996	4.22284	0	0	1
6.2205	2.30381	0	0	1
8.81752	7.8352	0	0	1
6.14122	3.35424	0	0	1
4.30209	4.22447	0	0	1
5.49146	0	0	0.520274	1
4.30044	0	0	0.412508	1
5.87163	2.08832	0	0	1
5.7664	6.04416	0	0	1
7.97607	0.935318	0	0	1
4.56992	1.37462	0	0	1
8.55688	1.27176	0	0	1
8.11245	3.252	0	0	1
3.26834	0.351544	0	0.18716	1
7.42282	4.02175	0	0	1
6.8055	0.0302591	0	0.107509	1
1.46818	5.79981	0	0	1
8.70581	0	0	2.33397	1
8.76758	0.381733	0	0	1
4.4623	0.125758	0	0	1
5.61157	4.2187	0	0	1
6.42187	3.72455	0	0	1
4.92961	4.65034	0	0	1
7.88683	0.932058	0	0	1
4.70463	0.732978	0	0	1
7.41	2.61458	0	0	1
2.86042	0.171415	0	0.0043921	1
3.85948	2.53398	0	0	1
5.29976	2.97518	0	0	1
9.23931	3.87311	0	0	1
6.81434	3.49194	0	0	1
4.28166	3.97438	0	0	1
4.29787	2.86607	0	0	1
3.89764	1.313	0	0	1
3.74955	5.29714	0	0	1
4.53927	0	0	1.0841	1
7.20836	3.49788	0	0	1
9.38521	2.73351	0	0	1
5.7138	3.43138	0	0	1
4.70097	1.84204	0	0	1
6.57995	6.88051	0	0	1
7.91655	5.28372	0	0	1
4.08411	4.11424	0	0	1
8.91383	1.14192	0	0	1
6.19129	1.10562	0	0	1
6.33698	5.25356	0	0	1
3.24624	0.796479	0	0	1
2.78094	1.36705	0	0	1
4.16745	8.46844	0	0	1
3.63587	1.65455	0	0	1
3.37389	2.15408	0	0	1
7.90875	7.37573	0	0	1
5.57126	1.35409	0	0	1
3.03099	6.1065	0	0	1
7.49611	4.06507	0	0	1
9.76989	3.29949	0	0	1
9.54751	1.07878	0	0	1
1.50115	3.97955	0	0	1
2.44926	5.47153	0	0	1
6.14589	2.62953	0	0	1
1.82522	4.07529	0	0	1
3.6731	2.606	0	0	1
8.19291	1.76279	0	0	1
9.69708	3.20549	0	0	1
2.77774	3.41119	0	0	1
5.97477	2.30604	0	0	1
3.59373	3.84774	0	0	1
7.24097	1.95756	0	0	1
4.08427	0.528607	0	0	1
5.00709	4.87999	0	0	1
5.98451	1.29594	0	0	1
2.47132	3.9155	0	0	1
5.48141	2.00637	0	0	1
3.12549	1.90855	0	0	1
7.13273	5.09092	0	0	1
3.94271	6.77135	0	0	1
6.50652	2.01735	0	0	1
2.47368	8.38324	0	0	1
8.49036	4.83192	0	0	1
3.44872	1.46374	0	0	1
6.03219	3.07091	0	0	1
4.75835	3.68076	0	0	1
5.32193	0	0	3.98998	1
1.23109	3.18117	0	0	1
9.7299	3.50783	0	0	1
4.87606	5.17614	0	0	1
5.89429	9.03587	0	0	1
9.22666	2.13395	0	0	1
1.33217	3.90113	0	0	1
6.67742	0.677811	0	0	1
5.49312	4.85072	0	0	1
4.39061	3.16901	0	0	1
2.17535	0.600735	0	0	1
9.05853	3.57018	0	0	1
2.71254	1.91517	0	0	1
4.57711	3.29385	0	0	1
7.10579	5.69054	0	0	1
5.0408	1.93928	0	0	1
1.44429	2.82149	0	0	1
3.24715	1.0113	0	0	1
4.25115	4.29336	0	0	1
7.39768	2.15296	0	0	1
8.00323	1.7387	0	0	1
3.02467	0	0	0.734864	1
7.77333	3.55851	0	0	1
6.38483	5.57291	0	0	1
6.1499	3.68848	0	0	1
7.4999	1.41815	0	0	1
6.36677	0.199751	0	0	1
6.3623	6.73327	0	0	1
6.43642	4.16957	0	0	1
6.57192	0.464263	0	0	1
9.84151	3.36153	0	0	1
7.03797	6.31108	0	0	1
6.74164	2.67857	0	0	1
5.80007	1.02439	0	0	1
5.60658	2.5758	0	0	1
3.32445	0	0	0.533481	1
10.7744	0	0	0.466568	1
10.8449	3.78463	0	0	1
5.71993	1.5127	0	0	1
7.61174	5.14421	0	0	1
7.82311	3.31548	0	0	1
8.21826	1.89768	0	0	1
5.66188	1.28316	0	0	1
3.4315	1.26641	0	0	1
8.41704	1.60327	0	0	1
7.97598	1.2304	0	0	1
5.65082	4.36815	0	0	1
4.34651	1.80409	0	0	1
4.31881	0	0	2.22573	1
7.74665	1.31957	0	0	1
2.30377	0.0966965	0	0.0176731	1
5.62058	2.77087	0	0	1
5.62675	2.61838	0	0	1
5.99067	0.43592	0	0	1
5.80066	1.69187	0	0	1
5.72782	3.0054	0	0	1
1.91671	1.94145	0	0	1
3.053	4.22032	0	0	1
6.18379	4.19553	0	0	1
5.59881	2.61958	0	0	1
6.67976	0	0	2.62546	1
5.96181	2.73268	0	0	1
6.65587	1.32702	0	0	1
7.94072	2.76498	0	0	1
4.90685	0	0	0.19522	1
4.80038	0.663907	0	0	1
4.58913	0.904101	0	0	1
5.117	6.79874	0	0	1
7.1411	1.08916	0	0	1
3.53261	2.37564	0	0	1
5.60045	4.10513	0	0	1
7.82865	0.753412	0	0	1
8.39001	5.06803	0	0	1
5.34846	6.1118	0	0	1
7.66053	3.82703	0	0	1
5.90726	9.49395	0	0	1
2.51417	0	0	2.13895	1
10.3778	4.08954	0	0	1
6.93688	3.18825	0	0	1
5.35592	2.95661	0	0	1
9.93337	4.09662	0	0	1
6.37882	1.55991	0	0	1
7.38836	5.09834	0	0	1
4.65456	0.910748	0	0	1
5.24868	5.65431	0	0	1
5.03968	2.65008	0	0	1
2.29928	0.805019	0	0	1
4.49962	6.11391	0	0	1
2.8018	5.21557	0	0	1
3.71506	0.426753	0	0	1
5.64622	5.84495	0	0	1
2.46748	0	0	1.30694	1
2.90127	3.70746	0	0	1
4.90297	0.576462	0	0	1
6.94097	2.36237	0	0	1
11.6759	3.97217	0	0	1
2.07355	0.981808	0	0	1
6.23349	2.40863	0	0	1
6.79871	2.28661	0	0	1
2.28293	1.37857	0	0	1
4.37993	0	0	0.778165	1
0.283336	2.21925	0	0	1
9.20671	0.954159	0	0	1
7.60822	3.9551	0	0	1
3.91801	0.0576367	0	0	1
8.74784	0.691269	0	0	1
4.40375	4.47684	0	0	1
5.06676	6.0703	0	0	1
6.42921	0	0	1.56024	1
6.11041	0.859754	0	0	1
8.39854	5.2035	0	0	1
2.20412	1.4373	0	0	1
8.37513	0	0	2.54267	1
6.95843	3.57274	0	0	1
7.08327	3.93282	0	0	1
6.851	0.629786	0	0	1
2.71472	0	0	1.95369	1
8.82298	2.05787	0	0	1
4.46916	1.90642	0	0	1
5.78381	0	0	0.231096	1
7.02278	2.73405	0	0	1
4.20248	1.67219	0	0	1
3.05657	4.20224	0	0	1
5.98876	3.49251	0	0	1
6.25092	1.49931	0	0	1
3.72212	0.507991	0	0	1
6.5433	4.12147	0	0	1
5.15073	0	0	0.538697	1
1.81956	4.80025	0	0	1
4.29384	3.80301	0	0	1
6.57508	3.75812	0	0	1
5.30539	2.89016	0	0	1
9.11723	3.27498	0	0	1
4.43353	3.51471	0	0	1
6.10868	0	0	0.209609	1
5.65906	6.78558	0	0	1
5.46148	2.05936	0	0	1
0.843494	0.577883	0	0	1
10.1205	2.37871	0	0	1
11.0154	0.00988668	0	0.104086	1
7.08956	2.49629	0	0	1
8.61299	1.80443	0	0	1
7.84559	3.77939	0	0	1
6.82537	4.22363	0	0	1
5.35136	5.20757	0	0	1
7.09772	1.62341	0	0	1
2.17856	2.11303	0	0	1
6.2115	4.59051	0	0	1
6.04521	4.67048	0	0	1
0.720829	1.77674	0	0	1
5.48945	0.226952	0	0	1
2.85921	3.94998	0	0	1
2.8356	0	0	2.80821	1
3.20464	0.576886	0	0	1
4.77515	0	0	0.0826591	1
4.39291	3.43861	0	0	1
5.73013	0.68961	0	0	1
7.17386	3.8893	0	0	1
3.86749	7.80999	0	0	1
3.94788	2.6245	0	0	1
7.64694	0.572945	0	0	1
7.08714	7.46817	0	0	1
4.22971	2.32905	0	0	1
7.14536	2.85592	0	0	1
1.43545	0.101584	0	0.126638	1
5.87499	3.09944	0	0	1
8.22463	0.0264199	0	0.0583441	1
10.8881	4.03405	0	0	1
10.7129	3.91652	0	0	1
7.62759	0.260758	0	0	1
7.18159	1.80242	0	0	1
6.59221	5.32435	0	0	1
6.73006	0.206496	0	0.504168	1
6.50952	3.49011	0	0	1
4.33627	5.89969	0	0	1
4.20897	3.50379	0	0	1
10.7176	0	0	0.830529	1
7.18128	0.228157	0	0	1
5.84026	2.64084	0	0	1
12.2741	7.74732	0	0	1
5.02908	1.17257	0	0	1
7.14712	2.75198	0	0	1
6.78375	5.66876	0	0	1
9.81407	1.27425	0	0	1
9.61545	4.02984	0	0	1
4.15868	3.15917	0	0	1
8.16887	3.23158	0	0	1
8.59365	6.50824	0	0	1
4.50428	1.92968	0	0	1
5.40654	3.31819	0	0	1
7.26033	2.38171	0	0	1
5.98814	4.8277	0	0	1
7.17398	4.19391	0	0	1
5.49954	3.59815	0	0	1
5.13037	1.58188	0	0	1
4.13638	4.27029	0	0	1
5.86667	0.329524	0	0	1
6.71598	3.55414	0	0	1
4.23529	4.56655	0	0	1
4.39383	3.30652	0	0	1
6.66565	0.738077	0	0	1
6.7251	2.69479	0	0	1
3.99423	2.65942	0	0	1
3.75505	0	0	1.98361	1
1.85879	3.76754	0	0	1
0.0320679	0.922055	0.0544229	0	1
10.0957	3.14538	0	0	1
11.9979	5.2603	0	0	1
6.90004	1.90469	0	0	1
5.17298	3.95821	0	0	1
7.49396	1.50892	0	0	1
5.63497	0.436327	0	0	1
6.82166	0.586074	0	0	1
5.3677	4.38762	0	0	1
4.98023	4.16402	0	0	1
3.83909	2.44608	0	0	1
3.10631	3.78371	0	0	1
1.33465	1.12902	0	0	1
4.03804	2.40552	0	0	1
3.56677	2.39569	0	0	1
6.12299	5.36178	0	0	1
3.941	6.02023	0	0	1
5.07651	0	0	0.751428	1
7.90727	2.14627	0	0	1
6.91952	0	0	0.641453	1
3.62126	0.518482	0	0	1
8.93309	1.34939	0	0	1
5.6247	4.39098	0	0	1
3.74286	0	0	4.8647	1
5.73121	0.1601	0	0.0251858	1
3.97396	3.77453	0	0	1
9.32533	2.4075	0	0	1
4.86123	7.60747	0	0	1
1.69802	8.40195	0	0	1
9.65471	2.04727	0	0	1
8.72719	2.1322	0	0	1
5.29559	1.84055	0	0	1
6.95319	1.61675	0	0	1
4.14897	4.00058	0	0	1
9.80409	2.59587	0	0	1
7.37496	1.33536	0	0	1
10.3237	7.45502	0	0	1
4.59658	6.80234	0	0	1
5.11674	3.40787	0	0	1
8.12717	1.9711	0	0	1
6.2801	6.85615	0	0	1
6.9336	1.32691	0	0	1
5.09856	1.3728	0	0	1
11.6909	1.86252	0	0	1
11.6754	6.9036	0	0	1
5.94031	3.04923	0	0	1
4.82275	0	0	0.156422	1
11.1952	2.45051	0	0	1
8.11472	2.72825	0	0	1
3.45739	0	0	2.59427	1
9.29378	3.77947	0	0	1
9.02677	0	0	0.0639132	1
7.3444	0.58029	0	0	1
8.88737	0.658119	0	0	1
6.00307	1.28286	0	0	1
7.81311	3.38363	0	0	1
3.80919	3.24163	0	0	1
8.53567	1.53952	0	0	1
5.02708	4.13604	0	0	1
4.95717	2.69287	0	0	1
8.62167	1.50727	0	0	1
11.2084	9.79715	0	0	1
3.66734	2.54735	0	0	1
3.56708	4.9133	0	0	1
6.29638	0.0641453	0	0.0490234	1
4.97727	3.04558	0	0	1
8.01403	3.17449	0	0	1
6.86331	4.73775	0	0	1
5.45222	6.12105	0	0	1
4.77452	0	0	0.743198	1
0.733575	1.72458	0	0	1
7.18012	3.57188	0	0	1
11.6638	1.86289	0	0	1
10.0485	1.0645	0	0	1
3.4348	0	0	0.956079	1
3.74384	4.98774	0	0	1
2.80406	3.26562	0	0	1
9.00833	2.32463	0	0	1
3.50508	3.92565	0	0	1
4.55219	1.67579	0	0	1
5.87555	4.99201	0	0	1
6.82713	3.53493	0	0	1
4.52343	4.04167	0	0	1
6.98867	3.33636	0	0	1
5.37343	5.04415	0	0	1
6.4338	4.66407	0	0	1
5.29488	1.29484	0	0	1
10.0443	4.57615	0	0	1
7.6286	5.09273	0	0	1
8.86477	3.29275	0	0	1
1.68654	2.57402	0	0	2
2.85517	0	0	0.406371	2
4.68877	0.0570175	0	0.0833702	2
2.0055	4.18376	0	0	2
0	0	0.400603	1.05179	2
2.33485	1.71006	0	0	2
0.244488	0.0697786	0	0.221371	2
1.69149	0	0	4.0518	2
1.45197	3.99951	0	0	2
0	0	0.478957	3.14504	2
1.28827	0	0	0.411345	2
0	0	0.859167	3.12724	2
1.89063	4.49259	0	0	2
3.6533	0.912173	0	0	2
3.6143	0.494198	0	0	2
2.71852	4.42448	0	0	2
0.670115	1.50678	0	0	2
6.83572	2.38803	0	0	2
2.33916	2.02595	0	0	2
0.773358	0	0	1.02067	2
0.132318	2.40257	0.129393	0	2
3.01505	0.0935542	0	0.43499	2
3.65961	0	0	0.302142	2
4.41247	0.436194	0	0.000400313	2
2.27485	4.81029	0	0	2
1.4541	0	0	0.248172	2
1.6916	2.69235	0	0	2
3.65284	3.39803	0	0	2
3.66545	1.00823	0	0	2
2.16147	2.37202	0	0	2
1.70929	0.455752	0	0	2
6.50102	4.71043	0	0	2
0.7561	2.16511	0	0	2
3.03116	3.98817	0	0	2
1.03098	0.247302	0	0	2
7.02573	3.67685	0	0	2
3.19516	0.621667	0	0	2
4.98702	0	0	0.822877	2
3.15052	1.798	0	0	2
3.89737	3.79984	0	0	2
3.43673	0	0	1.45545	2
3.43145	0	0	3.68288	2
3.24743	3.13581	0	0	2
1.65137	4.36731	0	0	2
0.013129	0	0.191313	3.71816	2
2.04669	0.26508	0	0	2
5.84333	1.47184	0	0	2
4.91299	4.52693	0	0	2
1.80337	0.327581	0	0	2
4.57492	0	0	0.221232	2
4.31949	0	0	1.20449	2
0.421025	3.56367	0	0	2
4.79859	2.89852	0	0	2
2.10281	1.92456	0	0	2
1.72181	1.76071	0	0	2
1.7552	1.96023	0	0	2
4.52194	0	0	0.375452	2
3.25648	1.31588	0	0	2
7.20532	0.198023	0	0.189334	2
1.21574	5.42246	0	0	2
1.59936	4.06668	0	0	2
3.34464	0.770256	0	0	2
5.26642	2.22639	0	0	2
1.26387	0	0	0.725275	2
0	3.02569	0.43136	0	2
6.70745	0	0	0.880416	2
2.29363	1.51663	0	0	2
2.33018	0	0	0.439997	2
1.57992	2.07182	0	0	2
2.70774	0	0	0.208668	2
7.44319	0	0	1.28881	2
0.397445	1.50874	0	0	2
0.964782	2.04786	0	0	2
2.84845	4.26707	0	0	2
1.07382	1.91645	0	0	2
6.28176	0.925357	0	0	2
3.67596	0.399788	0	0	2
4.14069	5.58397	0	0	2
5.36247	3.90362	0	0	2
1.94228	0	0	1.21504	2
1.10777	1.50762	0	0	2
2.75387	3.26511	0	0	2
0	0	1.3137	1.21382	2
0.336071	0.438473	0	0	2
2.79147	0	0	0.58472	2
3.69511	4.51711	0	0	2
2.50411	0	0	0.880029	2
2.37395	1.88775	0	0	2
2.93001	0.00488823	0	0.0138888	2
0.586227	0.876426	0	0	2
4.17068	0	0	0.558845	2
2.95872	1.00826	0	0	2
3.42188	3.33262	0	0	2
3.45765	0.0881294	0	0	2
0	0	2.36573	1.11779	2
0	0.444756	0.207358	0	2
3.84405	3.35064	0	0	2
2.54108	4.81706	0	0	2
0	1.69959	1.30992	0	2
2.14053	1.75311	0	0	2
4.91305	2.47293	0	0	2
2.42522	4.10639	0	0	2
3.21508	2.44905	0	0	2
2.16449	0	0	1.06584	2
4.90862	0	0	0.632849	2
2.25431	0.00398223	0	0.0748141	2
0.265095	0	0	3.22462	2
3.47561	4.05976	0	0	2
4.19258	1.09876	0	0	2
0.00570274	0.586845	0.10303	0.10607	2
1.05672	0.79696	0	0	2
1.70751	3.20016	0	0	2
4.49893	3.96174	0	0	2
5.25946	0.0394925	0	0.0376691	2
2.91189	3.78591	0	0	2
0	8.5648	0.651329	0	2
5.71165	3.47691	0	0	2
7.39858	0.707718	0	0	2
5.18362	0.720869	0	0	2
3.01216	3.48418	0	0	2
3.70491	0.110994	0	0	2
5.18326	0	0	1.03466	2
3.69089	0.0975828	0	0	2
3.42253	6.23699	0	0	2
2.86224	2.34304	0	0	2
0	0	2.07333	0.504909	2
5.00666	5.01077	0	0	2
0.161546	5.71753	0.0122652	0	2
0.750164	1.64527	0	0	2
6.94174	4.58679	0	0	2
0.333219	3.7	0	0	2
5.12036	0.946257	0	0	2
3.45278	0.271445	0	0	2
1.43601	0	0	1.72952	2
7.24626	0.69162	0	0	2
3.90473	0	0	0.124419	2
1.40407	0.16895	0	0.159839	2
10.2162	2.72759	0	0	2
1.22033	0	0	2.38327	2
1.12752	0	0	1.57953	2
0	3.67887	0.251552	0	2
3.21244	0	0	0.329125	2
3.19527	0.690888	0	0	2
6.87882	0	0	0.261405	2
6.49859	3.73497	0	0	2
0.0345869	0.558352	0.0712444	0	2
0	0.565382	0.609378	0	2
0	3.54366	0.0572031	0	2
2.78109	0.321034	0	0	2
0.417869	1.2723	0	0	2
1.8145	0	0	0.442177	2
0	0	0.295563	1.12691	2
2.79498	4.22692	0	0	2
2.54871	0.139243	0	0	2
3.6387	1.65856	0	0	2
5.23886	2.08843	0	0	2
3.86013	5.21397	0	0	2
3.45985	0	0	0.562312	2
6.73233	1.25339	0	0	2
5.4987	0.632245	0	0	2
3.26019	4.2823	0	0	2
0	2.9191	2.59643	0	2
5.85464	0	0	0.248134	2
4.80401	0.0347437	0	0.0780562	2
4.64513	0	0	0.0613878	2
5.20363	1.81068	0	0	2
4.64507	0	0	0.98038	2
2.32358	0.827526	0	0	2
3.18739	0	0	0.32828	2
3.71463	2.54589	0	0	2
1.2596	0	0	0.787299	2
0	0	0.686582	1.30035	2
6.53485	0	0	0.270383	2
3.18967	0.697819	0	0	2
1.96074	0.293665	0	0	2
0.447109	2.87796	0	0	2
3.27731	0.748647	0	0	2
4.9835	2.10681	0	0	2
3.01854	3.32119	0	0	2
4.13852	0.631071	0	0	2
0.527694	5.31375	0	0	2
1.68401	0	0	1.19938	2
3.25777	0.89693	0	0	2
2.3003	1.94469	0	0	2
0	3.81983	0.777125	0	2
1.04582	2.93829	0	0	2
3.59612	0	0	1.07843	2
0	0	1.28986	0.00957628	2
6.41501	1.10108	0	0	2
4.05931	0	0	1.8543	2
3.48145	5.3881	0	0	2
0.971763	4.04363	0	0	2
2.81272	0	0	1.40045	2
4.87145	1.45732	0	0	2
0	0	1.82404	1.44399	2
3.57378	0	0	3.91016	2
3.22154	0	0	0.10307	2
0.692642	0.0126367	0	0.0225395	2
4.65139	3.02938	0	0	2
0.944311	0	0	0.792067	2
0.359282	3.35184	0	0	2
4.1064	3.41691	0	0	2
1.20298	0	0	2.59626	2
0.747601	0.154048	0	0	2
3.11917	0	0	0.737983	2
4.18556	0.00288101	0	0.0842675	2
1.84476	1.34736	0	0	2
4.59215	1.57567	0	0	2
4.51875	1.84136	0	0	2
2.36928	0.315743	0	0.290922	2
6.9072	4.75511	0	0	2
2.40003	1.57173	0	0	2
2.01217	2.42543	0	0	2
3.18777	0	0	1.63354	2
5.78354	1.08356	0	0	2
3.32585	0	0	2.90571	2
4.1548	3.17072	0	0	2
0	2.23882	1.29287	0	2
2.02867	0.875585	0	0	2
3.02569	7.07619	0	0	2
4.25831	1.04638	0	0	2
4.50593	3.87261	0	0	2
5.15369	0	0	2.02357	2
3.45128	0	0	1.79366	2
1.72694	1.32013	0	0	2
3.20026	0.513067	0	0	2
0	0	0.810861	0.675635	2
3.74053	2.47915	0	0	2
1.10279	2.09094	0	0	2
0	1.3789	0.35507	0	2
4.59074	0.0354853	0	0.00146069	2
2.68154	0.814089	0	0	2
4.77023	0	0	3.64057	2
0.116931	2.15159	0	0	2
0	0	0.661532	1.95552	2
4.48374	4.74928	0	0	2
4.12048	0.383562	0	0	2
7.22641	0	0	4.75006	2
3.90601	4.45689	0	0	2
0	0.0956006	1.17411	0.29678	2
9.92893	0	0	2.01311	2
3.73467	1.38348	0	0	2
8.04302	1.62454	0	0	2
5.11831	0	0	1.31214	2
4.82178	0.389777	0	0	2
4.21539	0.0499253	0	0.294709	2
2.51222	1.38201	0	0	2
1.75692	0.186927	0	0	2
0	0	0.490222	1.88114	2
3.45817	0.759605	0	0	2
1.60607	0.522354	0	0	2
6.03589	0.161736	0	0	2
0.578802	1.87724	0	0	2
1.7795	1.67055	0	0	2
0	1.16387	0.117767	0	2
1.43652	0	0	0.163115	2
3.41118	3.36155	0	0	2
0	0	0.791093	0.104573	2
2.8514	2.68551	0	0	2
2.51621	0	0	1.20294	2
5.43997	0	0	0.633466	2
1.97362	0.0550477	0	0.0100104	2
6.6011	2.35633	0	0	2
0	4.21875	0.658977	0	2
0.117447	0	0	0.618682	2
0	1.14563	1.02305	0	2
1.36738	0	0	1.06068	2
1.26396	2.96811	0	0	2
2.01074	0.545229	0	0	2
5.25681	1.87049	0	0	2
3.11048	2.19677	0	0	2
6.08429	2.71855	0	0	2
6.27346	1.33849	0	0	2
4.23817	0	0	1.66317	2
2.79606	1.66378	0	0	2
0.0163655	0.0883667	0.0728092	0	2
4.17104	0	0	0.208155	2
7.45576	2.6985	0	0	2
1.33932	0	0	2.53407	2
0	3.49966	4.30432	0	2
0.864751	3.93363	0	0	2
4.64707	0.607335	0	0	2
0	0	0.362342	1.32631	2
1.83769	0.16819	0	0	2
3.7334	2.94614	0	0	2
2.14159	0	0	2.7377	2
2.53358	0	0	0.52778	2
2.96271	4.00352	0	0	2
4.32445	2.39772	0	0	2
8.06227	1.51294	0	0	2
3.9072	1.97666	0	0	2
1.28942	0	0	0.774046	2
6.09562	0.868607	0	0	2
3.84339	0.394679	0	0	2
5.4791	0	0	2.74544	2
4.73859	3.72269	0	0	2
4.34987	3.83558	0	0	2
2.07579	3.65539	0	0	2
0.3678	0	0	2.49767	2
3.99408	0.3569	0	0	2
3.58846	2.23518	0	0	2
6.32097	0	0	1.28831	2
2.71793	0.926201	0	0	2
0	2.6603	0.696769	0	2
1.2088	0	0	0.585982	2
5.35811	1.4146	0	0	2
4.41769	3.30813	0	0	2
4.83807	0.186471	0	0	2
0.36423	3.16699	0	0	2
5.09433	0	0	1.71976	2
6.23117	1.66633	0	0	2
2.30218	0	0	2.80204	2
0.800472	0	0	2.69718	2
4.18126	0	0	0.706469	2
1.39239	3.9637	0	0	2
2.1809	3.5797	0	0	2
0	3.85559	2.06811	0	2
3.50183	0.0190911	0	0.0180293	2
5.32053	0.825962	0	0	2
0	0	0.465308	1.7509	2
5.65328	6.56994	0	0	2
1.33618	0	0	1.41722	2
3.60597	2.86681	0	0	2
5.60564	3.13924	0	0	2
7.3675	1.9125	0	0	2
3.63865	1.86963	0	0	2
6.49052	1.86365	0	0	2
3.86476	5.2326	0	0	2
3.61546	3.13883	0	0	2
0.883952	2.13413	0	0	2
5.7795	0	0	1.16069	2
8.1782	0.271933	0	0	2
0.192435	3.65693	0	0	2
1.59454	0.815557	0	0	2
4.02979	0.502705	0	0	2
2.08958	0.864518	0	0	2
3.08302	2.05145	0	0	2
2.83955	1.77502	0	0	2
0	0	1.31223	2.31302	2
3.82868	1.48375	0	0	2
5.90096	0.747562	0	0	2
2.40689	3.22508	0	0	2
0.667258	2.17531	0	0	2
3.09682	1.75735	0	0	2
4.95073	2.24572	0	0	2
2.95697	2.15496	0	0	2
3.87675	3.91998	0	0	2
1.98158	2.98878	0	0	2
0.85224	0.0161113	0	0.0167641	2
1.7892	0	0	0.181804	2
3.60374	1.35169	0	0	2
1.89915	0	0	1.99427	2
6.46868	0.0092257	0	0.0128908	2
2.50022	0.211908	0	0	2
0	0	0.744753	1.93243	2
4.75918	2.94732	0	0	2
1.56987	1.4481	0	0	2
0	2.52838	1.16107	0	2
7.11978	2.34568	0	0	2
2.01907	2.61831	0	0	2
2.45951	4.16751	0	0	2
0.976484	2.21708	0	0	2
0	1.22944	0.902169	0	2
2.59269	2.36859	0	0	2
3.09781	3.01523	0	0	2
6.30439	0	0	0.284367	2
0.786764	0	0	2.15996	2
3.02922	0	0	3.72189	2
3.24846	0	0	2.48028	2
3.76998	1.17939	0	0	2
2.68726	2.70926	0	0	2
1.56712	2.28424	0	0	2
6.45329	3.36503	0	0	2
2.14332	1.83784	0	0	2
5.84522	3.39116	0	0	2
0.187535	1.56703	0.385634	0	2
4.19143	1.59419	0	0	2
6.71196	1.39964	0	0	2
1.36768	0	0	1.0417	2
7.98995	3.62811	0	0	2
1.95181	2.66652	0	0	2
5.27355	2.6514	0	0	2
0	5.37167	1.97059	0	2
7.3882	0.526627	0	0	2
1.37485	0	0	1.18908	2
3.6221	2.07243	0	0	2
0.483813	0	0	0.246058	2
1.11407	0	0	0.909063	2
3.2876	0.901594	0	0	2
1.7134	0.77403	0	0	2
1.5242	0.0411775	0	0.117192	2
3.3975	1.04306	0	0	2
6.08292	0	0	3.03727	2
3.27729	2.3229	0	0	2
7.6753	0.529881	0	0	2
2.36979	3.14742	0	0	2
0.891227	1.57347	0	0	2
1.73132	0.503873	0	0	2
5.17941	3.44182	0	0	2
3.20153	3.42894	0	0	2
0.949737	2.48205	0	0	2
4.00031	2.40569	0	0	2
4.69053	0	0	0.505028	2
1.42334	1.87118	0	0	2
1.35183	4.76306	0	0	2
3.46185	0	0	0.581765	2
3.69722	1.51587	0	0	2
1.21866	0.292293	0	0	2
0	2.75297	1.47495	0	2
5.2889	0	0	1.6368	2
6.32134	0.931288	0	0	2
0	4.3863	0.633285	0	2
3.27229	2.13362	0	0	2
4.20735	2.62015	0	0	2
2.89633	3.37135	0	0	2
2.00242	2.01824	0	0	2
4.83335	0	0	0.133061	2
7.24691	0.498107	0	0	2
2.92011	3.78221	0	0	2
3.14437	0	0	2.82602	2
3.14852e-06	0	0.058196	1.96194	2
1.21737	0.770243	0	0	2
0.0319147	4.54387	0.0537194	0	2
3.81982	3.58055	0	0	2
1.33407	2.81532	0	0	2
1.04808	0	0	3.67904	2
5.0089	1.92879	0	0	2
4.63652	2.74176	0	0	2
6.89898	0.148978	0	0	2
3.5957	3.01773	0	0	2
2.6158	4.20308	0	0	2
0.443967	3.23296	0	0	2
4.4048	2.95488	0	0	2
4.17835	0	0	1.19312	2
2.34478	1.76531	0	0	2
3.75529	1.38049	0	0	2
3.12706	4.35116	0	0	2
2.86275	0.575855	0	0	2
1.9842	2.50133	0	0	2
5.54211	1.38301	0	0	2
2.12428	0.597739	0	0	2
0	0.642582	1.47708	0	2
1.8373	0.570155	0	0	2
3.37511	0	0	1.26212	2
8.02296	2.37105	0	0	2
5.57556	0.0945768	0	0	2
3.01971	3.44809	0	0	2
3.54422	4.45405	0	0	2
2.42822	0.675619	0	0.273044	2
0	0	2.78984	0.634428	2
0.423895	0.927169	0	0	2
4.99769	4.96086	0	0	2
0	3.30295	2.27076	0	2
4.84863	0.780982	0	0	2
2.63081	6.65813	0	0	2
4.58517	1.34741	0	0	2
1.43484	0.749994	0	0	2
3.09146	0.299111	0	0	2
2.55128	0	0	3.36708	2
3.06688	0	0	1.03706	2
3.14067	0.565522	0	0	2
3.76258	2.7066	0	0	2
3.3892	1.40139	0	0	2
3.47079	0.142433	0	0.117893	2
5.56035	3.44708	0	0	2
0	2.62069	0.853186	0	2
0	3.8721	1.88137	0	2
6.87338	0.631694	0	0.107687	2
3.48509	4.00054	0	0	2
0.0284076	0	0.0310018	0.747295	2
3.49397	0.649615	0	0	2
2.45201	2.55692	0	0	2
0.893309	0	0	1.3139	2
2.51555	2.77702	0	0	2
3.57197	0	0	1.03583	2
4.4619	2.9594	0	0	2
0.524889	3.82201	0	0	2
1.60211	3.41564	0	0	2
2.49311	4.04253	0	0	2
0	0.146342	0.928056	0	2
2.03562	1.92498	0	0	2
1.05151	0	0	0.421661	2
7.65894	0.675299	0	0	2
0.480905	2.8157	0	0	2
3.2895	1.7364	0	0	2
5.7617	0	0	1.14862	2
3.62855	6.40107	0	0	2
0	0.612496	0.231159	0.280536	2
7.96153	0	0	0.196606	2
0	0	2.22859	0.990982	2
0.850226	0	0	1.29761	2
3.06175	3.39668	0	0	2
2.15691	0.0181168	0	0.0122096	2
0.357394	0	0	1.25171	2
2.42113	3.85276	0	0	2
4.28288	3.59032	0	0	2
3.97543	0	0	1.01353	2
3.92628	2.43992	0	0	2
3.30429	2.5123	0	0	2
2.83812	4.46051	0	0	2
0	5.58155	0.600456	0	3
0	0	2.48027	1.88636	3
0	0	3.94381	3.26554	3
3.60306	0	0	1.53811	3
0	0	0.661593	4.0812	3
0	0	0.557266	0.958827	3
1.77108	2.93302	0	0	3
1.1212	0.709582	0	0	3
0	0	0.778209	1.65384	3
0	0	3.33285	4.15377	3
1.49747	2.40513	0	0	3
1.34948	4.33558	0	0	3
0.589856	0	0	3.0123	3
0	0.422504	0.443991	0	3
0	0	1.07585	0.34621	3
1.20535	0.0190182	0	0.0627533	3
0	0	2.17668	3.83427	3
0	0	4.57033	0.861722	3
0.141066	0	0	3.22519	3
0	0	5.23802	0.25318	3
2.94497	0	0	0.789038	3
0.00892581	0	0.0578113	6.47527	3
0	2.68918	1.22518	0	3
0	1.06375	0.856656	0	3
1.59586	4.24162	0	0	3
1.66178	0	0	3.22593	3
2.54872	1.80485	0	0	3
0	0	2.76653	1.6366	3
1.19995	0	0	3.81498	3
0	1.25913	1.60999	0	3
0	0	3.21618	4.21714	3
1.34913	0	0	0.836231	3
0	2.87528	0.16576	0	3
0	2.13169	3.03617	0	3
3.02191	0	0	0.152351	3
2.3903	1.62936	0	0	3
1.42409	2.05626	0	0	3
0	0	3.64337	0.97061	3
1.24829	0	0	0.284753	3
0	0	2.8764	2.43874	3
0	1.09869	0.917273	0	3
0.000768727	1.20195	0.14108	0	3
0.592511	0	0	3.16849	3
5.83121	1.06786	0	0	3
0	1.15583	2.91163	0	3
1.71357	3.79545	0	0	3
0.829665	0	0	1.90962	3
0	0	4.02733	1.42286	3
1.90588	0	0	0.243352	3
2.54025	3.81396	0	0	3
1.27749	0	0	2.39367	3
0	0	0.0452262	4.79818	3
0	0	3.02605	0.260522	3
0	0	0.565033	0.886133	3
0.161173	3.70654	0	0	3
0	1.11847	2.10309	0	3
0	0	0.891034	1.24607	3
0.159387	1.49937	0	0.321571	3
0	2.18402	0.628759	0	3
1.89737	0	0	1.14652	3
0	0.297441	1.34866	0	3
0	6.79189	4.48971	0	3
0	0.741371	1.14374	0	3
0	1.21211	1.38024	0	3
2.95854	0	0	0.680829	3
0	0	1.024	4.01255	3
0	0	0.343745	4.75651	3
0	0	0.961254	1.98175	3
0	0	2.7919	1.55748	3
0	0	1.18135	0.475226	3
0	2.02782	3.70458	0	3
0	0.168266	1.62058	0.0214675	3
7.41484	2.78216	0	0	3
2.24314	0	0	2.84952	3
0.480381	1.00997	0	0	3
0	1.14619	2.56198	0	3
5.68843	0.109744	0	0.113497	3
2.03816	0	0	2.23496	3
0	0.392366	0.0539826	0	3
0	0	1.93153	0.85803	3
0	3.76948	3.34411	0	3
0	4.288	3.14095	0	3
0	5.32006	2.31625	0	3
0	0	0.822365	2.67846	3
2.5484	0.967347	0	0.357927	3
3.65918	0.139549	0	0	3
0	0	8.46721	5.66863	3
0	0	2.48595	0.857619	3
0	2.34508	2.42813	0	3
0	0	2.05343	2.26827	3
0.793181	0	0	2.68659	3
0	2.77135	1.28062	0	3
0.0819552	0.417494	0.22889	0	3
0	0	1.77369	1.08052	3
0	5.00001	2.15928	0	3
0	0	1.39482	1.99927	3
1.87887	1.57501	0	0	3
4.09302	0	0	3.4263	3
1.77748	0.162135	0	0	3
0	0.284264	0.375557	0	3
0	0	2.38404	1.29021	3
0	0	0.181013	0.495956	3
0	0	0.220883	1.10529	3
4.13467	3.69487	0	0	3
0	0	0.256742	1.44556	3
0	0.371336	4.51805	0	3
0	2.30906	0.926555	0	3
0	1.57318	0.132062	0	3
4.47172	0	0	1.74575	3
0	1.14566	1.14638	0	3
1.3896	0	0	1.38633	3
1.7992	0	0	1.6999	3
1.7418	5.1779	0	0	3
1.7904	2.65534	0	0	3
0	0	1.6877	4.2302	3
0.781136	2.26827	0	0	3
2.88625	0.657995	0	0	3
0	0	0.996174	3.34073	3
0	0	2.12754	0.839513	3
0	2.85244	0.845776	0	3
0	0	3.18616	3.24678	3
0	0.362857	0.754063	0	3
0	1.31673	2.01549	0	3
4.7822	0	0	0.497097	3
0	0	3.53004	0.503092	3
0	0	0.967785	1.22668	3
0	2.24216	1.05484	0	3
0.0286289	0.905428	0.0374321	0	3
0.742531	2.33816	0	0	3
2.70803	1.51417	0	0	3
4.53743	0	0	0.917595	3
2.31826	0	0	3.7344	3
0	0	3.04588	2.7619	3
1.11059	0	0	3.01888	3
0.627782	0	0	3.22321	3
2.01845	0.767147	0	0	3
0.67202	0	0	1.50864	3
2.36603	1.95166	0	0	3
0	2.1849	0.617988	0	3
0.0237207	2.72495	0.0854347	0	3
0	0	1.55017	1.28796	3
3.7966	1.1092	0	0	3
1.76227	0	0	5.64292	3
0.110046	0.179033	0	0	3
0	3.44619	4.86832	0	3
0	0.303587	1.36074	0	3
0	4.27175	0.594623	0	3
0.665879	2.11889	0	0	3
0	0	1.30501	1.5643	3
0.355449	5.0325	0	0	3
0	0	1.33893	0.241841	3
2.54193	3.68574	0	0	3
0	3.81764	2.79327	0	3
0.0187635	0.206533	0.073606	0	3
0	2.28028	8.36747	0	3
0	1.13634	1.38715	0	3
0	1.99788	2.9314	0	3
2.4335	0.73706	0	0	3
0.0834624	0	0	3.58696	3
0.310799	1.27141	0	0	3
0	0	2.66608	1.6608	3
2.56876	0	0	1.94648	3
0.255041	0	0	4.41928	3
1.65772	0.130393	0	0.277484	3
0	0	0.87234	1.27123	3
0	0.113815	3.04537	0	3
0	0.733047	2.28741	0	3
2.86758	2.56141	0	0	3
0.96011	0.262403	0	0.0140871	3
1.62302	1.99479	0	0	3
0	0	1.85624	4.63525	3
0	0	3.01481	4.93863	3
0.103209	0.687943	0.0823454	0	3
0	0.295124	2.70659	0	3
0	0	0.670065	0.486849	3
1.00226	2.31567	0	0	3
0	1.10318	2.60658	0	3
1.30038	0	0	1.18849	3
0	2.54423	0.692645	0	3
0.0231265	2.72205	0.112717	0	3
2.90185	0	0	3.39108	3
1.34031	0	0	3.86855	3
7.29654	0.190667	0	0	3
0	2.96295	2.4402	0	3
0	1.92251	1.54939	0	3
0	0	4.79075	0.621791	3
0	0	0.760206	1.85929	3
2.72015	2.78031	0	0	3
4.21483	0.0865062	0	0.0214852	3
5.82415	2.47092	0	0	3
0	0.431406	2.204	0	3
0.581971	0	0	4.23324	3
0	0	0.408998	4.89473	3
3.50416	2.61251	0	0	3
1.92989	1.03293	0	0	3
2.13077	1.62219	0	0	3
2.13229	0.357431	0	0	3
0.934047	0.16238	0	0	3
0	0	1.1717	4.17153	3
0	0	1.35155	2.30991	3
0	2.36025	0.985062	0	3
0	0	2.09918	1.12883	3
0	1.46029	1.11446	0	3
0	0.726555	0.407607	0	3
0	0.548666	1.69938	0	3
0.992001	0.752318	0	0	3
1.73469	0	0	3.11813	3
0	0	0.200821	1.8718	3
0	4.05539	0.338381	0	3
4.36279	0.912911	0	0	3
0	0.355091	1.45591	0.281837	3
0.464247	0.77503	0	0	3
0	0.426382	1.24619	0.565978	3
0	0	1.51107	0.689235	3
0	2.10664	2.07891	0	3
0	0.255484	0.33285	0	3
0.873775	0	0	1.31732	3
0.127418	1.09515	0.00831116	0	3
1.36569	4.51732	0	0	3
1.3871	1.1927	0	0	3
2.50468	2.99285	0	0	3
0	1.02819	3.11681	0	3
1.20361	0	0	3.81472	3
1.83059	0.463836	0	0	3
0.960132	2.85324	0	0	3
0	0	2.58204	1.3959	3
0	2.04263	1.37459	0	3
0.559932	2.70011	0	0	3
0	0	0.501634	2.82576	3
2.30327	0	0	2.65645	3
1.13372	3.07667	0	0	3
1.44712	0	0	5.0027	3
0	0	1.65234	1.05844	3
0	0	2.53704	2.51898	3
0	0	1.31306	0.731413	3
0.0308249	1.84433	0.0296778	0	3
0	1.05715	2.09413	0	3
0	0	1.95396	5.2973	3
1.076	0.926505	0	0	3
6.19763	2.20001	0	0	3
2.40965	3.42057	0	0	3
0.954804	5.60809	0	0	3
0	0	2.24522	0.101373	3
0.0462036	4.05563	0.175921	0	3
0	0.392036	2.12972	0	3
3.96114	0	0	0.143128	3
1.39704	0	0	3.88092	3
0.116586	0	0.00174807	3.75672	3
1.90103	1.04454	0	0.0278366	3
0	0.759742	0.594351	0	3
1.0441	0	0	0.802652	3
4.12237	0	0	0.542188	3
0.844605	0	0	0.248835	3
0	0	1.9225	1.73155	3
3.44879	2.63793	0	0	3
0	3.3143	2.69074	0	3
0	5.91518	0.478989	0	3
1.08976	0	0	2.32051	3
0.945309	0	0	3.12916	3
1.41972	4.09443	0	0	3
0.894829	0	0	3.40341	3
4.00071	3.14077	0	0	3
0.37593	0	0	4.68365	3
0	0	1.71555	4.2361	3
2.75226	0	0	0.304625	3
0.52269	0	0	2.25559	3
1.13072	0	0	0.312626	3
0	1.47686	1.25895	0	3
0	0.724539	5.91071	0	3
1.52314	0	0	3.81617	3
4.50775	1.96041	0	0	3
3.54619	0	0	2.50212	3
0	0	1.33422	4.80944	3
0	0	2.79648	1.25284	3
2.33183	0	0	2.76009	3
0	0	2.23283	3.22674	3
1.10466	1.98178	0	0	3
0	0	2.10984	0.575647	3
1.71441	1.45626	0	0	3
0	0	2.37706	2.54501	3
0.20276	3.84865	0	0	3
0.122771	1.53904	0.0133613	0	3
0.115111	0	0	2.43854	3
4.7314	3.59629	0	0	3
1.78785	0	0	4.24303	3
0	0.872244	3.27276	0	3
0.988869	1.35111	0	0	3
3.7739	1.44733	0	0	3
0.716463	0	0	0.116312	3
0	3.15067	0.556655	0	3
0	0.439409	4.31384	0	3
0	0	1.74255	1.1705	3
0	2.87162	1.36651	0	3
0	0.100725	3.5962	0.0668176	3
0	0	1.46034	2.61442	3
0	2.72115	1.42932	0	3
0	0	1.12456	5.11338	3
0	1.60944	0.459233	0	3
0	0	2.11526	2.07311	3
0	0.478619	0.499205	0	3
1.18671	0	0	0.194441	3
0	0	1.00127	2.56029	3
0	0.511532	0.602293	0	3
0	0.321098	2.14004	0	3
0	0	2.18998	1.38311	3
0	0.0016226	2.66695	0.17594	3
1.58828	0	0	0.299914	3
0	0	1.98566	0.376455	3
0	1.00431	1.924	0	3
0.811518	0.238397	0	0.150453	3
0	0.216173	0.088655	0	3
0	1.54999	0.558427	0	3
0	1.35145	2.48128	0	3
1.21573	0.366035	0	0.0422704	3
0	4.25569	2.4038	0	3
0	0	2.02891	5.07584	3
0	0.821863	2.25801	0	3
3.18187	0	0	4.31561	3
1.41912	1.80661	0	0	3
0.0588563	0	0.0897773	1.82248	3
0.0988094	2.35542	0.000943187	0	3
0.483602	0.479701	0	0	3
0	0.0430992	0.479167	0.189149	3
0.587326	0.196785	0	0.388245	3
0	0	2.26546	1.71533	3
0.128226	1.39563	0.0150824	0	3
0	0	1.10985	1.93314	3
0	0	2.38519	3.18687	3
1.42473	1.3844	0	0	3
0	0.0116433	5.09558	0.0390877	3
0	0.46174	1.08878	0	3
0	1.35292	2.57561	0	3
0	2.28148	4.34092	0	3
0	0	2.24415	1.55128	3
4.9793	2.20862	0	0	3
0	0.696136	0.411424	0	3
0	0.618639	2.30959	0	3
0	1.41999	0.0725072	0	3
1.92135	0	0	6.25501	3
2.51959	0.703568	0	0	3
1.74823	0.775626	0	0	3
0	4.00732	1.61978	0	3
0.307255	0	0	4.37461	3
1.56672	0	0	0.948599	3
0	0	1.86329	2.25716	3
0.102861	1.60958	0.120286	0	3
0	1.17926	2.62899	0	3
0	2.80032	1.23364	0	3
0.900125	0	0	2.56977	3
2.79324	0	0	4.00464	3
2.37779	0	0	1.08376	3
3.87232	0	0	2.3595	3
0	3.30026	2.25705	0	3
0	2.38741	1.43383	0	3
0.191833	0	0	3.20855	3
0	1.81951	0.930257	0	3
0	0	0.552527	4.50497	3
0	3.48989	1.52047	0	3
0.514295	1.61686	0	0	3
2.73886	0	0	1.2603	3
3.52481	0	0	8.49312	3
0	0	1.96463	1.99867	3
3.43223	2.59248	0	0	3
3.08027	0	0	0.681026	3
1.8963	0	0	1.36618	3
3.60502	0	0	2.05662	3
0.0387548	2.1016	0.0734807	0	3
0.897161	4.67957	0	0	3
0	1.8227	0.973226	0	3
1.49372	0	0	2.23058	3
0.953121	0	0	1.55776	3
0	0	1.55712	0.753398	3
0	3.52144	0.850897	0	3
0	0.253843	4.41115	0	3
0	0	1.52441	5.44871	3
0	0	0.548376	1.58102	3
0.537709	0	0	0.883226	3
0	1.48126	0.802529	0	3
5.45474	1.11595	0	0	3
1.16446	0.226305	0	0	3
0	0.352148	4.51506	0	3
0	2.4912	3.06042	0	3
0.135105	0.0985584	0.0508325	0	3
0	0	4.08532	3.77581	3
0	0	3.33577	2.20129	3
0	0	5.19063	1.76643	3
3.7724	0	0	1.9642	3
0.567951	1.56783	0	0	3
0	0	4.36362	4.56999	3
0	0	0.132104	4.4084	3
1.05203	2.91897	0	0	3
0	0	0.0399561	1.67876	3
0	0	3.91935	1.17758	3
0	0.551427	3.90168	0	3
0	0	0.751174	2.0529	3
0	0.917274	0.4325	0	3
1.10767	0	0	1.69064	3
0	0	2.06415	0.945234	3
0	0	1.87116	2.43966	3
0	0	3.0486	1.21281	3
0.432705	2.42248	0	0	3
0	0.781688	2.29522	0	3
0	0	0.752889	1.47021	3
1.04341	2.44912	0	0	3
2.5914	0	0	0.601913	3
0	0.486718	4.06501	0	3
0.133947	0.249909	0	0.295251	3
5.11362	2.52186	0	0	3
2.80443	4.76029	0	0	3
0.685343	0	0	3.65471	3
0	0	0.790138	4.91132	3
0	4.09151	0.70351	0	3
2.43295	1.25151	0	0	3
0	0	0.523239	0.962762	3
0.800582	0.035479	0	0.0506077	3
0	2.09829	1.28642	0	3
1.10382	0	0	5.71826	3
0	0	0.54643	4.3785	3
0.299184	6.26807	0	0	3
0.627813	0	0	1.12562	3
0	1.77701	1.01715	0	3
0	0	0.701372	0.398973	3
0	0.937884	2.47054	0	3
0.499499	4.82763	0	0	3
0	0	1.67139	3.90988	3
0	0	1.63585	2.67648	3
0	0	1.5224	2.0258	3
0.988905	0	0.375356	1.90859	3
1.64786	4.04902	0	0	3
1.71336	0	0	1.19021	3
0	0	1.40062	1.69997	3
0	0	6.72547	4.41668	3
0.111249	1.3079	0.236066	0	3
3.53431	1.45776	0	0	3
0	0	4.16579	2.01855	3
2.27611	1.97476	0	0	3
0.235822	4.38675	0	0	3
0	0.262577	1.52568	0.00437808	3
0	0	4.21288	2.36698	3
2.33142	0.839039	0	0	3
0	0.893581	6.3056	0	3
0	0	2.11273	4.95557	3
1.06818	0	0	0.646177	3
0	3.61731	1.95591	0	3
0	0.0992596	0.148711	0.0498223	3
2.98424	0.52431	0	0	3
0.211062	2.31606	0.00396379	0	3
3.44493	0	0	0.515885	3
0	6.11702	1.32214	0	3
0	0	1.635	5.4351	3
0.591193	1.44127	0	0	3
0.169905	0.109544	0.00748621	0.120128	3
0	2.23849	0.757782	0	3
0	0	0.948683	0.923287	3
2.03831	3.07006	0	0	3
1.22351	0.243528	0	0	3
0	0	0.255616	1.40274	3
0	0	0.316113	4.21816	3
0	0.964782	4.0821	0	3
0	0.528165	0.133943	0	3
1.11391	4.11546	0	0	3
2.43666	0	0	6.20778	3
0	0.0982934	3.58657	0	3
3.94484	0	0	0.724075	3
0	2.74112	5.07294	0	3
0	2.40358	2.56252	0	3
0.911092	5.49235	0	0	3
0	0	2.01228	2.84877	3
0	1.15753	4.28615	0	3
0	0.928381	0.412498	0	3
0	0.232323	0.313803	0	3
0	0	0.692246	4.72822	3
0	0	0.879279	0.292872	3
1.82754	0	0	3.73241	3
0	0	2.58921	6.33074	3
0	0	1.97679	4.79121	3
0	0.846194	0.618691	0	3
0	0	1.61677	2.54243	3
4.32896	0	0	0.75464	3
0	0	4.19716	0.685417	3
0.36442	0.757973	0	0.702573	3
0	0	0.47821	0.276579	3
0	0.24128	4.87391	0	3
0	1.56731	1.68467	0	3
0	0	1.03495	1.29024	3
7.29892	0.0453181	0	0.140025	3
0	0.893833	0.663951	0	3
0	0	1.2962	1.08509	3
1.15767	1.79177	0	0	3
1.89768	0	0	0.720817	3
0	0	0.821604	0.664914	3
4.33338	1.28515	0	0	3
1.06107	1.74845	0	0	3
0.0982085	1.22472	0	0	3
1.45592	0	0	2.14321	3
0	0	0.283113	5.69797	3
1.04402	2.06739	0	0	3
0.296963	1.51507	0.138234	0	3
1.99807	1.35836	0	0	3
2.48301	0	0	2.56397	3
0.349141	1.05422	0	0	4
0	3.08324	0.0922463	0	4
0.433311	1.20066	0	0	4
0	3.02448	2.8824	0	4
0	0	0.764449	0.211786	4
0	0	0.773719	0.860596	4
1.04903	0.769173	0	0	4
0	0	1.26725	3.04474	4
2.04654	1.64588	0	0	4
1.44375	0	0	0.646718	4
0	0	1.54218	1.39066	4
1.79399	2.71677	0	0	4
4.11137	4.07597	0	0	4
0	1.34448	1.39469	0	4
4.17548	0.0474694	0	0.266129	4
1.37378	3.2832	0	0	4
0.522799	0.130535	0	0.0229294	4
1.09957	1.35993	0	0	4
0	0.320028	0.569239	0	4
0.204225	1.26461	0	0	4
0	0	1.62204	1.57206	4
0	1.2528	0.62977	0	4
2.445	0.611619	0	0	4
0	0	0.490045	3.16563	4
3.17188	0	0	2.90304	4
0	0	0.0601786	1.84401	4
0	0	1.68621	0.359278	4
0	0.104523	0.486022	0	4
1.18269	0	0	0.351054	4
0.300015	0	0.0379565	1.58458	4
1.54802	0	0	0.844494	4
0	0.602341	0.774914	0	4
0	2.3426	2.18229	0	4
0	3.4935	1.36857	0	4
0	0.36028	0.77201	0	4
1.08023	1.34559	0	0	4
0.0333315	0.70261	0	0	4
0	0.792997	1.03647	0	4
0.532884	2.25577	0	0	4
0	1.9515	1.09564	0	4
0	1.82576	1.18245	0	4
2.87459	1.45374	0	0	4
2.08308	0	0	0.738904	4
0	0	3.2181	2.55602	4
3.97646	2.30432	0	0	4
0	0.705479	0.609369	0	4
1.03657	0.230611	0	0	4
1.2321	1.10417	0	0	4
0	1.90475	3.23276	0	4
2.32414	0	0	0.414447	4
0	2.65193	2.43691	0	4
1.28828	0	0	4.03718	4
0	4.7997	2.50767	0	4
0	0	0.861068	0.633128	4
0.61216	4.15792	0	0	4
0	0	2.54218	1.14286	4
0.97265	0	0	2.12349	4
0.119625	0.857425	0	0	4
0	0	0.191046	1.84457	4
0	2.54858	0.547441	0	4
0	0.0398584	2.98243	0.130978	4
0.990901	3.48406	0	0	4
0.0507738	3.64027	0.0822967	0	4
1.60642	0.103873	0	0	4
0	0	1.54017	2.50127	4
0	0	1.8444	1.20966	4
0.0441851	1.97952	0	0	4
1.84239	1.19292	0	0	4
1.41677	1.25963	0	0	4
0.0303999	3.5854	0.0205183	0	4
0.130784	1.80416	0	0	4
1.13614	1.41229	0	0	4
0.300777	0.694583	0	0	4
0	0	3.73002	1.86673	4
0	0	0.976468	0.71139	4
1.04782	0	0	1.69701	4
0	0	1.25822	2.53946	4
1.68367	0.690633	0	0	4
2.08174	0.680892	0	0	4
0	1.13783	2.05762	0	4
0	2.33456	0.709514	0	4
0.942624	2.11911	0	0	4
4.72134	1.88923	0	0	4
0.228549	0	0	2.69941	4
0	2.87979	1.38798	0	4
1.64656	2.15755	0	0	4
0.104188	0.595034	0.0332096	0	4
0	0	1.01368	0.395447	4
1.74969	5.06988	0	0	4
0	0.0219308	0.739926	0.587382	4
0	0.687387	0.440343	0	4
0	1.06549	0.93697	0	4
0	0	1.86154	0.37206	4
0	0.94842	1.44875	0	4
2.87467	1.95743	0	0	4
0.923385	0	0	2.61115	4
0	1.7252	1.30337	0	4
1.97928	0	0	1.02648	4
0	0	0.831337	2.18697	4
0	3.30698	1.98159	0	4
0.0812849	0	0	0.586749	4
1.73728	0.17417	0	0	4
0	2.74916	0.740218	0	4
0	1.03657	1.50351	0	4
1.28167	1.0875	0	0	4
2.06007	0	0	0.50218	4
0.879402	2.30902	0	0	4
0	0	0.943766	1.50617	4
0	3.18242	1.6428	0	4
0.218742	0.766481	0.00273184	0	4
1.09044	3.89673	0	0	4
0	1.67928	1.32005	0	4
0	3.70409	2.80539	0	4
0.322682	2.89155	0	0	4
2.14219	3.62743	0	0	4
0.11104	3.78971	0	0	4
3.10907	0	0	1.03964	4
0	2.23557	1.84285	0	4
2.43415	0	0	0.372803	4
0.736117	2.88851	0	0	4
0.481155	0	0.675883	0.0978096	4
0	0.325042	0.652573	0	4
0.948364	2.30643	0	0	4
3.03685	2.48039	0	0	4
1.94214	2.08579	0	0	4
1.41134	0	0	1.76175	4
0	0	1.42002	0.831699	4
0.504695	1.92944	0	0	4
0	0	3.09065	0.472547	4
0	0	1.92911	1.25727	4
1.70642	0	0	3.86333	4
0	1.20695	2.81976	0	4
0.150428	3.31188	0	0	4
0.800943	0	0	0.22716	4
1.86762	1.4785	0	0	4
0	0	3.36486	1.43367	4
2.69413	3.90368	0	0	4
0	0.0265546	1.38134	0.24918	4
0.418162	0.805892	0	0	4
0	0	2.02962	0.222995	4
0.132292	0.271265	0	0.70447	4
0.73509	0.913973	0	0	4
2.07547	6.40502	0	0	4
3.27774	0.938276	0	0	4
0.0156842	2.76805	0.204734	0	4
0.353155	2.15881	0	0	4
0	0.695578	0.606841	0	4
2.42289	1.18586	0	0	4
0.242084	2.16574	0	0	4
1.23717	2.4445	0	0	4
0	0	1.47574	0.385781	4
0	0	0.72597	0.120724	4
0	1.27375	2.79659	0	4
1.27278	0.0913195	0	0	4
0	0.162593	4.07784	0.0806364	4
0	0.971674	1.71276	0	4
0	3.715	0.61366	0	4
0	2.32876	1.35132	0	4
2.52915	1.35923	0	0	4
0	0	0.925218	1.77489	4
0.873102	0	0	2.68524	4
1.04638	0.691519	0	0	4
3.76826	0	0	0.945797	4
0.792125	0	0	1.0137	4
0.034377	5.00864	0.0236035	0	4
0	0	1.63706	0.324004	4
0.692713	0	0	0.889104	4
0.234154	0	0	2.51727	4
1.79607	1.89691	0	0	4
1.69232	0	0	2.92472	4
0.696231	1.4669	0	0	4
1.79483	1.6484	0	0	4
0.290299	0.954908	0	0	4
1.01615	0	0	0.379777	4
0	4.88983	0.648778	0	4
1.96407	0	0	1.60181	4
1.30688	2.24397	0	0	4
0	0.359886	1.97358	0	4
2.86158	3.27942	0	0	4
0	0	3.48883	0.903497	4
0	1.68615	1.95207	0	4
0.606908	0	0	3.65631	4
1.35216	0.668289	0	0	4
0.685565	2.95302	0.361508	0	4
1.66653	3.83777	0	0	4
0	3.58781	2.91678	0	4
0	0	2.05147	2.21019	4
0	0	0.759277	2.32485	4
0	1.25811	0.550929	0	4
1.33287	0	0	0.961176	4
0	0	0.265674	1.28423	4
0.59939	1.07705	0	0	4
0	2.43527	0.865173	0	4
0	0.174116	1.26025	0.146113	4
0	0	2.23515	2.81061	4
0	1.21886	0.745814	0	4
2.4449	0	0	4.12548	4
0	1.36553	0.526171	0	4
0	0	2.32166	2.44507	4
0	1.2637	0.795042	0	4
0	0	0.578852	0.947203	4
0.613381	0	0	1.53754	4
0	0	0.635211	0.555878	4
2.14881	0	0	2.20813	4
1.03762	0.27629	0	0.227784	4
2.42077	2.57852	0	0	4
0	0	2.2136	1.97225	4
1.10877	3.86323	0	0	4
0.320815	0.946877	0	0	4
0.631924	0	0	0.992857	4
2.91001	0	0	3.22046	4
1.47607	0	0	0.616309	4
0.606974	0	0	0.453187	4
0	0	1.50251	0.80737	4
0.16795	0.0905828	0	0	4
1.80173	0	0	0.771448	4
0.0734362	0.72836	0.0399558	0	4
0	0	0.371828	1.12013	4
0	0.991041	2.37103	0	4
1.66979	0	0	0.478767	4
1.56791	0	0	3.41347	4
0	1.01971	0.1307	0	4
1.93705	2.48577	0	0	4
4.18218	0	0	0.242507	4
0	6.28156	2.32235	0	4
1.03987	0	0	1.35213	4
1.71471	0	0	1.55647	4
0	1.81362	0.686365	0	4
0.611088	0	0	4.62848	4
0	0	0.50163	2.89497	4
2.25007	0	0	2.26894	4
2.35953	3.32209	0	0	4
0	1.07055	0.468396	0	4
0.582292	0.0054818	0	0.0169856	4
0.00778438	1.44029	0.0376517	0	4
0	0.962952	3.25869	0	4
0	0	0.519092	3.11677	4
1.11111	0	0	1.95768	4
0	0	2.25815	0.877211	4
0	0.935038	2.63633	0	4
0.924001	1.02402	0	0	4
3.27782	0.655193	0	0	4
0	0	0.806653	0.149909	4
3.09355	2.0108	0	0	4
0.914813	3.45263	0	0	4
0.0721525	1.13428	0.016618	0	4
0	1.57822	1.77304	0	4
1.42837	0	0	0.513006	4
0	0	1.65196	0.219848	4
0	0.0319899	2.58938	0.804811	4
0.450057	0	0	0.156163	4
0	2.30811	1.12351	0	4
0	0	3.24644	1.77498	4
0.954894	0	0	0.326936	4
0	0	0.546168	0.178518	4
1.70401	0.600774	0	0	4
1.09367	0	0	0.309648	4
1.38143	0.0241651	0	0.0446634	4
0.905533	0	0	2.2824	4
0	0	3.40182	5.36358	4
0.996585	0	0	0.880268	4
0	0	0.7794	1.31678	4
4.41541	4.03101	0	0	4
0.179033	1.24276	0	0	4
1.02147	0	0	1.1731	4
3.53886	0	0	2.34439	4
0.420561	2.27019	0	0	4
0	0	2.99435	1.7406	4
1.51056	5.83277	0	0	4
0	0.705024	0.265386	0	4
0.465033	1.49151	0	0	4
2.46728	0	0	1.03156	4
3.55355	4.36528	0	0	4
0	0	2.48058	1.26874	4
0	1.96111	1.16963	0	4
0.0535006	0	0.0409842	0.0588348	4
1.36749	0	0	1.35986	4
0	2.60948	0.151151	0	4
0.281279	2.36542	0	0	4
1.82231	0	0	0.225446	4
0	2.35602	0.216031	0	4
1.48399	0	0	2.35084	4
0.0423656	0	0	2.85119	4
0.492563	0	0	0.683976	4
0	3.20514	0.695285	0	4
4.37016	0	0	0.183475	4
0	2.11012	0.635968	0	4
0.993527	0	0	3.53509	4
0.704476	0	0	0.585485	4
0	0.586736	2.13374	0	4
2.93514	1.84352	0	0	4
0.181587	0	0	0.22801	4
0.959576	0.267433	0	0	4
2.55674	1.76989	0	0	4
0	1.10593	2.25479	0	4
0	0	0.397651	1.50371	4
0	0.848766	0.674183	0	4
0	1.4405	0.538796	0	4
0	0	0.363707	1.62275	4
0.600647	0	0	3.71797	4
0.317791	0.457678	0	0	4
2.52337	2.79762	0	0	4
0	0	1.8116	0.742098	4
0	3.06536	1.00514	0	4
0.996426	0	0	2.19061	4
0	0.229598	0.120857	0	4
0.329676	0.486284	0	0	4
0.169323	0	0	0.189104	4
0	0.666863	2.31348	0	4
0.766257	3.37496	0	0	4
0	2.50219	1.96209	0	4
0.0685833	0	0.101308	0.241075	4
1.59272	2.269	0	0	4
0.203034	2.2557	0	0	4
0	1.16167	1.21152	0	4
0	0	1.01944	0.55093	4
0	2.97217	0.828625	0	4
0	0	1.62686	1.75911	4
1.60779	0	0	0.867666	4
0.518529	2.81542	0	0	4
0	1.08885	0.642801	0	4
0.88095	0.955352	0	0	4
0	0	2.69194	0.232009	4
0	1.62097	2.86623	0	4
0	2.2026	2.03423	0	4
2.99397	2.11697	0	0	4
0	0	0.110589	1.97217	4
0	1.04846	1.71251	0	4
0	0	2.38159	0.710048	4
0	0	1.01812	0.818779	4
0	2.31496	1.75702	0	4
2.40127	0	0	1.05349	4
0	0.449467	0.0846131	0.0496854	4
1.61648	0	0	1.42349	4
1.33892	0	0	1.14024	4
2.73309	0	0	0.132445	4
0	0.429611	0.209435	0	4
0.671821	2.8956	0	0	4
0.0753376	0.575044	0.129171	0	4
2.3507	2.85976	0	0	4
0.423878	2.16444	0.0214596	0	4
2.91408	0.854204	0	0	4
1.4762	0	0	3.1882	4
3.00697	0	0	0.432059	4
0	2.12712	1.16971	0	4
0	0.922274	1.90719	0	4
5.58582	0.846747	0	0	4
0	2.79234	0.2814	0	4
0	1.13288	0.289422	0	4
3.6061	1.30802	0	0	4
1.47977	2.81422	0	0	4
0	0	0.166111	1.32842	4
0	0	0.659833	1.26576	4
0.0338151	0.699759	0.0515543	0	4
0.644065	2.56059	0	0	4
0	1.36198	0.56716	0	4
1.90445	0	0	1.06874	4
1.20386	0	0	1.59521	4
0	0	0.559686	3.47315	4
2.36262	0	0	0.313872	4
0.858348	0	0	0.403726	4
0.520414	1.49434	0	0	4
0.248531	0.0768243	0	0.0141995	4
0.0985545	1.99302	0.0387439	0	4
0.614029	0	0	2.7334	4
0.320748	1.95543	0.571781	0	4
0	1.886	2.70071	0	4
0.835922	0	0	0.487536	4
4.87691	0.890739	0	0	4
0	0.700693	2.2389	0	4
0.267525	0	0	1.56063	4
0.618049	0	0	0.605137	4
0	2.29468	2.60503	0	4
1.15197	0.648784	0	0	4
0	2.20641	0.926933	0	4
1.37872	0.100568	0	0	4
0.689337	0.562704	0	0	4
0	0	0.427905	1.21719	4
3.37903	0.229315	0	0	4
0	0	0.936788	0.145438	4
0	0.742243	1.91754	0	4
0	4.07936	1.88519	0	4
0	3.24147	1.91865	0	4
0	0	0.445199	1.16737	4
0	0.794653	2.03254	0	4
0.450584	2.95733	0	0	4
0	0	1.28378	0.159519	4
1.52399	1.52384	0	0	4
2.7191	3.32171	0	0	4
0.732739	0.440782	0	0	4
0	0	1.30964	2.3298	4
0	1.42244	0.239515	0	4
0	1.92693	1.72664	0	4
2.02184	1.70775	0	0	4
4.76516	2.87278	0	0	4
0	0	3.63531	0.193597	4
2.99678	0.7654	0	0	4
0	0	4.9704	3.81497	4
3.18488	0.190632	0	0	4
1.62128	1.16344	0	0	4
0	0	1.88449	4.29829	4
0	0.250893	1.15075	0.0865318	4
4.53093	0	0	3.55863	4
0.103485	0	0.0225689	0.797377	4
0	4.36835	2.32047	0	4
4.24486	1.00945	0	0	4
0	1.6602	0.314921	0	4
0.454297	0	0	2.24393	4
0	1.27573	4.33456	0	4
1.25556	0	0	4.9078	4
0	0	1.98046	3.24867	4
0	0	2.58386	3.26014	4
0	1.00178	2.17799	0	4
2.63907	0	0	0.955135	4
0	7.01786	4.4855	0	4
0	1.23867	1.22069	0.203164	4
0	0.988338	0.769043	0	4
0	2.40874	1.15115	0	4
0	0.0454047	1.83633	0.152909	4
0.666642	0.182715	0	0.0520889	4
0.419472	0	0	2.88068	4
0	0.307417	1.82194	0	4
1.41869	2.57073	0	0	4
0	1.04073	0.437268	0	4
1.96921	3.26644	0	0	4
0	0	0.216337	0.632144	4
0	0	1.13487	0.156011	4
3.0327	0	0	2.83796	4
0	4.66425	1.65825	0	4
0	2.58921	1.56235	0	4
0	0.0313594	0.0372751	0.0642863	4
0	0.347159	0.0585679	0	4
0	1.87737	2.15684	0	4
0	1.52246	1.10228	0	4
0.0366618	0	0	2.21902	4
1.95868	0.601322	0	0	4
1.38146	0	0	2.07597	4
0	0	1.09441	2.24256	4
2.85896	3.58806	0	0	4
0.883105	0.481687	0	0	4
0	0.754366	0.286312	0	4
1.16018	3.06135	0	0	4
2.2973	0.69754	0	0	4
0	0	0.435332	0.96685	4
0	0	2.00256	1.13237	4
0	0	2.39686	0.678146	4
0	3.97962	0.928616	0	4
0	0.309758	0.139907	0	4
1.57287	0	0	2.51944	4
0.844195	1.23387	0	0	4
0.582434	3.05602	0	0	4
1.42522	1.64208	0	0	4
0	0	4.32346	2.26996	4
1.07898	0.243085	0	0	4
1.08797	5.16795	0	0	4
0.746958	1.01439	0	0	4
0.889529	0	0	0.764047	4
2.34786	0	0	0.703429	4
0	2.41354	1.59887	0	4
0.410004	2.44763	0	0	4
0	4.33154	0.261797	0	4
0	0	2.53147	1.27541	4
0.629609	1.90729	0	0	4
1.44761	0	0	2.94316	4
0	1.88324	0.497522	0	4
0	0.871069	2.50641	0	4
0	0.0491061	2.56914	0	4
0	1.81005	1.85136	0	4
0.293459	0.102553	0	0.173563	4
0	3.3878	2.54728	0	4
3.18153	0	0	1.26136	4
0.983232	5.50505	0	0	4
0.411649	2.6343	0	0	4
1.83554	0.732186	0	0	4
0	1.08385	0.202193	0	4
0.0316422	0	0	0.138994	4
0.614297	2.89857	0	0	4
1.86677	2.64913	0	0	4
0.608312	2.58717	0	0	4
0	0	1.10674	0.408926	4
0	1.12232	1.19218	0	4
0.82405	0	0	0.190729	4
0.0600673	0	0.0638979	3.47463	4
1.68942	0	0	1.48754	4
0	0	2.09107	1.60162	4
0.953793	0	0	2.16041	4
1.09635	0	0	0.964502	4
0	0	0.755022	3.35629	4
0.145725	0.656198	0.0562195	0	4
2.89819	0	0	1.97847	4
1.4353	0.481788	0	0	4
0.757501	0	0	2.25387	4
0	0	3.77395	1.00829	4
0	0	0.651545	1.18609	4
2.09744	3.5787	0	0	4
0	2.34373	2.18567	0	4
0	1.37258	1.71175	0	4
0	1.41465	0.422896	0	4
0	0	2.75807	1.7272	4
[truncated: 501 more rows]

## Sheet: Fig. 4e
	With electrical stimulation (measurements x channels)
	87.1311	88.0207	79.8528	73.9662	65.1689	47.0784	27.1337	22.6533	39.137	34.5236	73.4562	79.5299	84.4518	85.1214	82.8671	72.3685
	61.2753	142.488	134.432	97.2015	68.3477	39.2901	27.7586	39.1236	57.9283	72.5532	78.0289	90.3421	88.5163	84.3927	82.9945	76.1418
	19.557	18.3304	19.7742	21.5948	20.8143	21.9279	20.7515	20.5529	22.4698	24.3482	25.1378	25.448	23.5239	25.293	23.3756	20.6787
	25.0802	22.5789	23.7998	23.662	26.8894	28.0224	29.4352	33.0467	35.5427	37.5921	37.1506	37.1456	37.9219	37.4073	33.6504	30.7751
	49.2252	89.0265	85.3699	69.1824	55.9708	48.4046	55.7591	64.7526	77.5055	83.4937	87.4681	85.6646	81.639	85.7134	74.5014	70.22
	35.0608	26.8939	38.2177	40.1939	37.2518	47.5474	57.7895	64.5504	78.2447	83.1778	80.0423	84.5058	81.6244	84.7124	74.6146	76.1943
	14.2078	19.5426	27.0586	20.0377	22.005	22.1893	35.9566	50.5461	61.8465	68.9454	65.6617	61.3735	52.3253	50.9924	41.6221	45.7771
	27.9037	21.6584	21.6895	25.1618	28.9427	32.9889	34.9331	36.7045	36.332	33.4348	29.7427	28.3019	23.7429	22.9935	19.5267	19.8853
	44.6492	36.1076	31.1911	34.7481	37.6314	44.6479	50.1926	47.5212	47.1525	42.0645	37.1174	35.9139	32.9929	31.4355	32.9483	31.6652
	64.9994	60.9459	43.8992	24.2747	12.7107	26.2566	40.809	54.5392	66.2105	72.2127	75.9439	71.8175	61.8977	50.0871	41.8454	35.4849
	20.5783	28.2605	38.03	45.4715	47.9797	47.9123	46.2662	43.8784	41.9837	35.5095	31.1688	26.6923	24.886	25.5952	25.3592	28.6515
	23.0086	19.3346	15.8073	17.5315	20.0398	26.2208	34.6109	41.0199	46.649	48.8034	51.7875	51.9831	53.6512	49.9281	47.9808	47.2067
	27.9554	26.0653	33.7769	36.204	43.9399	42.4154	39.8327	36.9679	32.5333	30.5817	24.7321	26.6935	24.6028	30.6823	31.7959	32.4018
	45.1893	47.5209	34.9837	19.0097	16.9312	26.3981	40.0338	43.7796	43.8795	39.4036	33.3035	26.902	27.04	31.3695	30.0502	36.7161
	15.3962	21.7899	22.1434	24.4315	23.9785	21.1104	25.2529	26.3904	23.8676	26.0836	23.412	25.4054	30.9265	26.5628	26.5946	21.9775
	26.6696	23.7335	21.1226	20.7942	28.7223	34.1809	33.9427	32.8829	37.4031	32.6135	33.1884	29.0571	25.0112	29.1374	28.0676	22.123
	32.4732	30.7991	31.5727	37.2925	37.4146	38.7934	38.4624	37.0996	36.3359	33.9468	28.7452	32.1836	26.6312	26.908	26.8835	28.5564
	18.0828	15.8286	15.3453	16.0829	17.5595	20.7346	23.2785	24.1263	26.7116	27.1043	27.6895	24.2212	23.2086	21.5091	23.8765	21.5326
	28.7259	30.876	33.7679	36.9654	38.3894	36.9858	36.9788	36.9516	34.8934	34.1203	39.4652	36.3639	38.1111	34.315	38.5565	36.2956
	33.991	37.4766	34.8014	36.2147	39.3728	37.6183	35.7224	35.6145	35.6995	35.8546	32.3443	33.167	33.3706	31.1775	34.957	36.1945
	Without electrical stimulation (measurements x channels)
	95.1597	96.9867	93.2322	86.4989	77.3214	59.1406	49.8071	40.4348	48.6695	32.2061	71.6404	75.3118	76.3383	75.6205	74.9744	67.7908
	101.833	121.107	103.557	75.0266	55.711	31.8864	18.5187	19.0104	31.1631	37.9255	52.3016	54.1372	56.6506	55.2032	57.2324	53.8103
	22.1985	20.1602	22.0836	20.896	23.2227	23.3086	27.9555	29.9789	32.8229	33.2831	39.4044	38.3539	33.1873	33.3701	26.9285	19.0571
	19.7678	18.4361	19.1662	19.0386	18.9892	18.6437	21.2636	21.5262	22.9874	25.9299	26.3416	31.9177	28.3659	28.2479	24.8698	25.6421
	66.879	67.0532	64.9032	53.4869	43.0841	42.5362	49.8955	55.3125	63.745	64.435	68.8835	65.896	64.0739	59.7821	57.5315	47.8628
	33.3943	44.1084	40.1286	35.2156	25.6839	31.3633	35.8593	42.0972	49.6083	56.4216	59.4133	62.3163	62.9772	70.0273	69.6472	69.1032
	33.9314	30.7134	30.2773	30.8654	31.2902	29.2465	32.7761	31.5767	33.6496	35.7342	37.6414	34.388	34.3918	28.9455	32.172	24.2795
	28.2519	21.1397	22.6181	24.2321	26.6054	26.0809	26.9385	24.6045	25.4456	23.0594	20.7471	21.2096	18.7531	19.4848	16.8268	19.2384
	21.1771	19.095	27.4131	35.4139	39.5255	50.503	49.719	49.3971	46.275	36.0717	39.2468	38.4934	32.9193	30.9434	30.5055	31.0284
	67.0538	60.9259	45.7462	23.2181	17.777	24.0476	36.1366	48.7997	60	63.6092	65.1732	57.9022	56.09	45.1853	38.7952	28.3189
	25.8257	22.5629	18.75	20.7642	27.9356	33.2288	39.3225	40.1849	42.2854	41.4869	40.1364	29.9984	30.0083	26.7082	24.4853	24.169
	18.8851	15.8436	14.8252	14.0433	17.5274	16.1221	20.7221	26.0575	30.6945	36.1916	38.8921	38.2317	40.4863	37.0903	40.2292	36.1515
	29.1466	40.373	49.1721	60.5153	65.8409	61.4309	50.746	44.9439	38.7117	33.2445	22.6923	22.881	20.2393	17.3324	20.3089	19.4006
	46.1919	41.4973	32.811	26.7354	18.8217	20.3815	26.1284	34.9319	34.6382	32.3003	27.9084	27.4998	27.4623	27.3024	22.5812	29.8631
	49.3041	41.5228	31.3977	25.5689	22.8263	23.7527	23.4664	24.7894	22.4394	27.1129	25.2835	25.9352	27.6604	30.0117	30.5818	29.5688
	33.3737	26.3286	22.5598	23.7046	24.0558	24.2646	24.9324	23.8287	24.7181	25.6795	19.2813	20.8733	22.9897	24.5372	23.0373	24.2278
	16.6903	19.099	19.5658	22.7636	21.4382	21.3524	19.1824	19.9647	19.5413	21.7396	17.2389	16.763	14.203	15.0809	19.8256	19.2568
	12.1028	15.5733	13.0751	12.3151	11.6666	14.6084	15.8473	21.7506	23.3031	27.1474	30.7934	34.9783	34.3017	35.0766	36.1663	36.0501
	28.5227	32.3709	30.7122	31.4001	30.4487	32.799	33.1357	34.1502	30.9682	30.8649	33.4122	31.6733	27.9072	26.315	29.8042	27.2136
	31.8727	37.5302	37.1161	38.5307	40.1175	37.4306	37.0624	39.1647	34.811	35.7342	38.7815	37.2866	32.5539	36.7694	33.3727	35.099

## Sheet: Fig. 4g
	With electrical stimulation (measurements x channels)
	64.2595	65.0105	60.6661	57.5645	54.4936	40.1521	30.474	23.9397	26.6936	36.5573	41.8639	44.6691	40.9482	44.191	46.9013	40.8251
	25.3073	69.7844	60.1442	45.4454	34.2688	26.4089	29.6709	30.3167	40.6741	47.7085	49.8996	48.3775	45.5163	48.9148	42.4395	44.8498
	15.2158	16.2734	15.7491	14.4137	16.4625	20.2586	26.154	28.2206	30.9039	33.8971	34.1764	32.2473	30.812	28.4659	29.1572	24.1168
	24.8461	21.2487	19.9278	21.0129	20.382	22.7993	21.9799	25.627	29.332	31.0162	32.0848	33.1585	27.8256	29.7464	25.4983	27.9163
	45.566	56.0347	57.474	45.6417	36.0078	26.3905	24.7826	25.0556	30.1438	33.8501	31.2575	31.1219	27.1057	27.332	23.4098	25.3978
	21.9738	22.6241	23.5916	24.267	22.0606	29.1367	27.7468	29.7351	30.792	32.344	32.3207	33.4644	29.1824	39.1699	29.7665	38.3162
	22.4453	19.7577	21.6699	20.7381	18.539	12.8861	17.7279	26.8208	36.0068	37.6464	34.6135	33.6619	25.8808	20.0157	16.1642	22.9192
	16.3514	33.6847	41.508	50.762	60.3015	66.6473	71.1182	71.4849	67.2539	55.6715	46.9434	39.1275	33.2945	25.8371	23.3612	19.1496
	38.0296	29.7663	33.152	52.2136	67.6512	81.8619	95.4624	98.0746	95.8327	77.7403	66.6147	52.8571	43.3575	39.8781	38.3197	34.5292
	62.9105	55.5545	40.6641	34.6993	35.5252	47.1287	61.8309	75.2664	90.3327	98.6016	91.32	85.4415	73.365	58.6364	46.9165	36.4275
	26.9207	39.0243	54.035	62.2312	69.9587	70.1286	71.8066	65.8495	61.4917	55.5444	45.2017	38.6122	31.9878	28.9705	31.534	28.6897
	34.6215	29.5028	28.4905	26.3981	28.3347	27.1227	30.285	38.1314	41.4299	48.39	51.3844	52.647	53.1665	47.667	45.566	40.8332
	35.7547	40.7074	47.7893	50.7954	54.3545	47.7452	42.0055	33.726	33.0435	25.6989	29.8376	31.0839	29.8734	33.3624	36.9277	32.4195
	36.9338	27.8728	25.4091	22.0532	27.8359	37.2739	46.2278	49.4726	45.0927	35.0094	27.8407	25.8731	20.8778	16.9719	22.5227	19.7986
	24.9876	27.7528	26.1124	26.3086	26.226	29.0439	28.8956	32.8224	37.8994	33.4746	38.4249	41.3604	36.1686	39.0537	39.7767	43.3385
	30.8843	53.4797	34.5901	34.0623	55.4601	61.9399	57.2535	51.6301	47.1915	43.1983	36.6857	30.9222	22.5616	22.367	21.1776	24.3783
	29.7688	30.8576	33.9687	32.385	33.2912	35.863	37.8953	35.9908	38.4688	39.2263	33.8937	35.3815	35.3144	37.1181	38.3268	33.003
	17.4233	19.9995	19.7986	20.03	21.3876	20.8003	21.4571	21.9689	23.2598	25.9531	29.8757	31.9342	33.0179	33.3609	29.7585	33.5655
	38.466	36.6249	38.5403	38.6493	40.4791	44.5475	45.3771	44.0344	46.3457	45.106	40.9405	41.4506	43.6981	44.0294	42.9618	39.8325
	20.2167	21.1763	23.5831	26.2962	25.2376	25.6803	27.5989	25.8012	28.5327	32.059	30.0361	29.1323	24.8075	33.7702	31.4524	35.126
	Without electrical stimulation (measurements x channels)
	43.188	46.747	41.0815	37.493	33.8982	27.4069	18.6218	19.6064	24.6233	33.122	41.5664	44.8842	43.5605	43.666	43.6532	42.0959
	75.3072	64.1032	50.2294	39.2518	31.0727	24.76	22.8613	26.5124	34.8507	42.9498	42.3445	44.2357	43.0595	41.2043	41.1973	43.0577
	20.7298	19.1109	19.3923	17.3324	16.8427	15.6166	24.7199	29.2496	36.8734	41.1516	44.6636	39.7189	41.4812	34.3546	32.7616	28.0446
	22.9298	23.3784	22.4776	21.2291	17.1	18.3192	18.4149	18.6807	22.5466	25.5685	26.7744	23.2822	25.4214	24.4117	24.0846	25.2581
	25.01	32.2424	29.1378	17.4322	13.2433	18.9455	27.8149	33.6647	42.7	47.1571	43.6708	43.706	38.1261	38.4477	37.3589	43.1935
	28.5067	21.5935	18.369	17.3566	20.1548	23.1837	27.5362	30.5592	35.6407	35.3759	34.6419	32.6486	29.3903	33.5967	30.0651	38.863
	19.503	16.136	14.9554	15.2365	14.7754	15.2355	18.2358	20.1606	23.6318	23.2738	24.1947	21.2127	17.5066	19.319	16.2174	20.1463
	17.4405	17.2873	17.8544	16.9829	19.4668	19.0863	20.3056	22.6657	22.7996	22.0262	21.5942	19.8097	17.8972	17.3924	17.8543	20.1774
	22.2593	18.4957	28.1852	38.8339	52.5733	60.8694	72.4201	70.5511	61.3768	52.9803	35.9144	30.7184	28.5454	27.0516	27.8936	28.7692
	70.6742	54.8476	39.5987	18.635	33.4818	48.5861	63.2275	72.5864	84.7328	89.449	85.511	78.7077	59.397	50.6267	41.7176	34.437
	21.7705	22.3257	23.1439	27.9335	34.1687	38.9873	40.2142	40.2467	44.0433	45.1264	40.527	39.1313	37.6654	34.2368	32.0731	34.265
	19.9294	18.3326	20.6924	18.6284	20.7545	24.2776	22.7773	24.395	31.7746	36.3807	38.5742	36.5248	37.0628	32.6001	31.6488	26.8916
	22.3329	25.5112	31.6004	34.037	34.8454	35.2693	32.1623	28.1041	24.09	18.0427	19.3449	18.4592	22.8131	26.9827	26.6276	26.489
	28.2603	25.6555	26.4343	28.4808	33.0988	43.466	51.4313	60.437	57.3029	54.3263	45.031	39.2301	38.2272	32.5589	38.0404	33.8267
	32.8552	23.9496	23.45	23.8594	20.7335	20.7105	21.3012	20.5351	20.5612	19.4095	22.7899	22.4016	24.7528	25.1147	28.6252	29.5686
	40.3834	40.902	23.7888	37.3422	46.7353	45.267	44.5736	42.6067	40.0181	33.5557	34.6479	30.0895	28.0907	28.6025	28.8671	27.528
	28.3067	25.9719	23.6782	25.5796	26.212	26.4205	29.3144	27.7489	31.6755	30.6794	32.052	30.2526	33.6873	31.1999	32.6575	30.1153
	17.8354	9.25011	10.9283	13.1091	12.9829	15.2952	18.5158	19.4411	18.311	19.7014	22.5933	23.3962	22.0954	21.948	23.5482	26.0819
	14.4676	15.3651	14.8863	15.518	17.9295	18.2047	21.3519	18.3997	21.2571	21.0767	13.7676	21.1636	23.1039	21.4538	19.5265	19.9536
	22.884	26.2199	22.1706	25.0687	23.3611	20.097	23.4893	22.2891	25.4531	25.0077	24.3143	26.3076	25.9512	24.444	31.3153	27.0531

## Sheet: Fig. S2
BandPower	bool_idxsecho	freq_band	channel						Frequency bands					ch: 1-16 FAF; 16-32 AC
-88.1097	0	1	1						1. delta
-48.8984	1	1	1						2. theta
-80.3425	1	1	1						3. alpha
-82.3694	1	1	1						4. beta1
-85.9677	0	1	1						5. beta2
-80.1643	0	1	1						6. gamma1
-68.2443	0	1	1						7. gamma2
-67.471	1	1	1						8. gamma3
-57.106	0	1	1
-81.5845	1	1	1
-78.1664	0	1	1
-67.0732	0	1	1
-84.1484	0	1	1
-93.027	0	1	1
652.763	1	1	1
1509.96	1	1	1
1057.8	1	1	1
1476.22	0	1	1
1303.05	0	1	1
1450.31	0	1	1
831.436	0	1	1
1633.66	0	1	1
700.923	1	1	1
797.828	1	1	1
912.24	0	1	1
968.423	0	1	1
824.345	0	1	1
1128.97	0	1	1
1622.65	0	1	1
1190.01	1	1	1
773.356	0	1	1
672.34	0	1	1
318.255	0	1	1
381.486	0	1	1
541.418	0	1	1
1002.87	1	1	1
435.408	0	1	1
760.241	0	1	1
1146.48	0	1	1
469.549	1	1	1
1527.03	0	1	1
1322.67	0	1	1
211.028	0	1	1
984.166	0	1	1
113.637	0	1	1
224.867	1	1	1
1054.63	0	1	1
1281.58	0	1	1
1274.26	0	1	1
331.356	0	1	1
386.505	1	1	1
26.1487	0	1	1
0.631937	0	1	1
144.879	0	1	1
-46.0559	0	1	1
84.1034	0	1	1
-23.3483	0	1	1
1246.1	0	1	1
49.4088	1	1	1
203.73	0	1	1
288.161	0	1	1
-10.801	0	1	1
34.9037	0	1	1
-19.0339	0	1	1
77.3445	0	1	1
-71.8914	0	1	1
260.445	0	1	1
-67.8324	0	1	1
20.905	0	1	1
8.58699	0	1	1
-6.59325	0	1	1
38.6358	0	1	1
26.8846	0	1	1
154.968	0	1	1
-20.1433	0	1	1
-35.8136	0	1	1
-51.889	0	1	1
13.4963	0	1	1
-53.3866	0	1	1
-39.6342	0	1	1
-66.3994	0	1	1
-50.0964	0	1	1
-63.8081	0	1	1
-40.6749	0	1	1
-88.6858	0	1	1
-89.1195	0	1	1
-63.9359	0	1	1
-89.8592	0	1	1
24.8948	0	1	1
7974.61	0	1	1
-32.0303	0	1	1
-8.3566	0	1	1
109.066	0	1	1
175.777	0	1	1
257.436	0	1	1
-19.256	0	1	1
1433.93	0	1	1
4176.5	0	1	1
-85.2765	0	1	1
405.201	0	1	1
4760.37	0	1	1
291.23	0	1	1
-19.4861	0	1	1
-77.2048	0	1	1
-75.4416	0	1	1
-80.9605	0	1	1
-71.167	1	1	1
91.9938	0	1	1
-39.2709	0	1	1
1115.64	0	1	1
-96.079	1	1	1
26.2243	0	1	1
427.974	0	1	1
-99.9837	0	1	1
-98.5972	0	1	1
-99.9996	0	1	1
-99.9995	0	1	1
768.343	1	1	1
748.788	0	1	1
2598.05	1	1	1
917.884	0	1	1
873.257	1	1	1
1422.29	0	1	1
414.884	0	1	1
916.101	0	1	1
1170.96	0	1	1
722.558	1	1	1
1274.06	0	1	1
961.69	0	1	1
854.578	1	1	1
556.176	1	1	1
774.673	0	1	1
1102.87	0	1	1
218.266	0	1	1
384.194	0	1	1
241.609	0	1	1
344.747	0	1	1
333.242	0	1	1
186.744	0	1	1
614.127	0	1	1
175.484	0	1	1
244.269	1	1	1
587.312	0	1	1
515.938	1	1	1
226.269	0	1	1
449.384	0	1	1
93.9215	0	1	1
389.742	0	1	1
415.093	0	1	1
276.095	1	1	1
484.171	0	1	1
72.7544	0	1	1
259.83	0	1	1
1575.26	0	1	1
971.09	0	1	1
1114.73	0	1	1
84.8853	0	1	1
10.8318	0	1	1
7.92851	0	1	1
136.703	0	1	1
2443.29	0	1	1
442.236	0	1	1
0.185398	0	1	1
557.525	0	1	1
-28.0084	0	1	1
31.5485	0	1	1
-39.5842	0	1	1
55.1568	0	1	1
-2.93065	1	1	1
173.08	0	1	1
-29.2214	0	1	1
32.9874	0	1	1
1367.95	0	1	1
1954.49	0	1	1
2461.48	0	1	1
957.037	0	1	1
1012	1	1	1
2186.24	0	1	1
2563.57	0	1	1
1585.1	0	1	1
1169.25	0	1	1
1364.69	1	1	1
2578.69	0	1	1
1615.47	0	1	1
1740.26	1	1	1
1620.11	0	1	1
2285.25	0	1	1
2265.74	0	1	1
3858.67	0	1	1
3274.02	0	1	1
377.112	0	1	1
1415.1	0	1	1
3106.46	0	1	1
816.751	0	1	1
529.716	1	1	1
1032.93	0	1	1
1067.88	0	1	1
406.338	0	1	1
498.513	0	1	1
1726.45	0	1	1
1023.54	0	1	1
388.448	1	1	1
1672.09	1	1	1
1566.69	1	1	1
555.34	0	1	1
887.659	0	1	1
15282.6	0	1	1
799.412	0	1	1
457.188	1	1	1
2703.7	1	1	1
1644.93	1	1	1
848.711	1	1	1
159.062	1	1	1
422.696	0	1	1
224.98	1	1	1
387.528	0	1	1
95.3816	0	1	1
30.7976	1	1	1
319.774	0	1	1
546.786	1	1	1
564.664	0	1	1
982.382	1	1	1
918.382	0	1	1
236.167	0	1	1
333.392	0	1	1
516.453	0	1	1
900.018	1	1	1
623.605	0	1	1
-28.6977	0	1	1
-92.8538	0	1	1
-79.7059	0	1	1
-83.0802	0	1	1
-57.9405	0	1	1
-34.6345	0	1	1
-68.5743	0	1	1
-29.2348	0	1	1
-41.177	0	1	1
-6.74344	0	1	1
-56.4822	0	1	1
-70.2444	0	1	1
-56.845	0	1	1
-23.1216	0	1	1
-4.15193	0	1	1
-77.0122	0	1	1
-9.99721	0	1	1
85.3942	0	1	1
-56.2801	0	1	1
160.804	0	1	1
38.3211	0	1	1
14.7951	0	1	1
-5.89849	0	1	1
81.8079	0	1	1
90.9011	0	1	1
74.987	0	1	1
-58.9361	0	1	1
-15.0861	0	1	1
58.752	0	1	1
7.62713	0	1	1
-78.9506	0	1	1
2.11383	0	1	1
-34.3215	0	1	1
-19.6324	1	1	1
-45.9946	0	1	1
-79.1492	0	1	1
-33.3748	0	1	1
-36.8302	0	1	1
-62.0798	0	1	1
-29.5827	0	1	1
-70.5925	0	1	1
12.0977	0	1	1
-27.5689	0	1	1
-74.4469	0	1	1
-28.1249	0	1	1
-57.6775	0	1	1
-34.9633	1	1	1
-58.0822	0	1	1
33.3911	0	1	1
-50.5182	0	1	1
-55.5112	0	1	1
-53.2945	0	1	1
-63.7542	0	1	1
-32.3983	0	1	1
-55.2126	0	1	1
-53.7569	0	1	1
-35.0253	0	1	1
-16.6112	0	1	1
-78.8093	0	1	1
-58.9231	0	1	1
-12.3499	0	1	1
-55.7496	0	1	1
-68.6989	0	1	1
-48.2212	0	1	1
-68.3488	0	1	1
-57.5904	0	1	1
-41.6176	0	1	1
-51.8783	0	1	1
-83.1819	0	1	1
-63.227	0	1	1
-35.181	0	1	1
-38.5983	0	1	1
-64.1677	0	1	1
-27.3424	0	1	1
-63.3928	0	1	1
-59.0452	0	1	1
-34.6195	0	1	1
-60.965	0	1	1
-67.2686	0	1	1
-53.8967	0	1	1
-57.9224	0	1	1
1721.3	0	1	1
255.036	0	1	1
97.5186	0	1	1
149.772	0	1	1
208.014	0	1	1
-9.9457	0	1	1
189.903	0	1	1
286.879	0	1	1
240.069	1	1	1
205.883	0	1	1
188.263	0	1	1
473.599	0	1	1
147.012	0	1	1
431.765	0	1	1
210.208	0	1	1
-24.4284	0	1	1
-30.3247	0	1	1
-7.82585	0	1	1
171.216	0	1	1
-19.0702	1	1	1
3150.28	0	1	1
131.894	0	1	1
5.55302	0	1	1
202.784	0	1	1
181.527	0	1	1
323.632	0	1	1
103.699	0	1	1
131.733	0	1	1
62.9559	0	1	1
-99.9998	0	1	1
-99.9998	0	1	1
-99.9997	0	1	1
-99.9999	0	1	1
-99.9996	0	1	1
-99.9986	0	1	1
-99.9996	0	1	1
-99.9995	0	1	1
-99.9998	1	1	1
-99.9998	0	1	1
-99.9998	1	1	1
-99.9996	1	1	1
-30.5489	0	1	1
19.4556	0	1	1
-8.25021	0	1	1
-53.2996	1	1	1
-20.0413	0	1	1
14.1772	0	1	1
54.0652	0	1	1
139.08	0	1	1
28.2334	0	1	1
85.5534	0	1	1
76.0096	0	1	1
21.1799	0	1	1
104.121	1	1	1
6.53651	0	1	1
487.678	0	1	1
-12.2752	0	1	1
5.66821	0	1	1
16.9585	0	1	1
65.7371	0	1	1
79.051	0	1	1
-50.575	0	1	1
103.164	0	1	1
-39.2124	0	1	1
82.8614	0	1	1
-5.88641	0	1	1
62.4377	0	1	1
103.028	0	1	1
-38.195	0	1	1
116.459	0	1	1
1.15324	0	1	1
42.3291	1	1	1
27.3882	0	1	1
-19.6229	0	1	1
-27.7881	0	1	1
71.5374	1	1	1
17.4995	1	1	1
189.476	0	1	1
126.503	0	1	1
53.8431	0	1	1
27.8693	0	1	1
114.975	0	1	1
124.525	1	1	1
35.1813	0	1	1
27.337	0	1	1
23.774	0	1	1
165.87	0	1	1
4.91529	1	1	1
29.8896	0	1	1
-30.2476	0	1	1
34.4571	0	1	1
16.3056	0	1	1
15.65	0	1	1
56.3158	0	1	1
9.2203	0	1	1
-35.2868	0	1	1
-84.8959	0	1	1
27.1649	1	1	1
45.5787	0	1	1
-45.9751	0	1	1
-46.0853	0	1	1
10.5416	0	1	1
-67.348	0	1	1
0.0397886	0	1	1
-13.4615	0	1	1
-80.9553	0	1	1
-37.4261	0	1	1
-44.1163	0	1	1
21.9392	0	1	1
-4.15104	0	1	1
-6.1249	1	1	1
-80.7301	1	1	1
-18.1664	1	1	1
-73.9889	0	1	1
-12.7378	0	1	1
76.0515	0	1	1
-52.9108	0	1	1
-32.6212	0	1	1
-45.3009	0	1	1
-60.1112	0	1	1
-45.777	0	1	1
-41.4614	0	1	1
-40.9011	0	1	1
-46.4778	0	1	1
-51.0932	0	1	1
-40.3353	0	1	1
-82.135	0	1	1
-42.8927	1	1	1
-14.2653	0	1	1
-47.1035	0	1	1
-12.8408	0	1	1
99.9728	0	1	1
-59.7722	0	1	1
4.92072	0	1	1
-35.0575	0	1	1
596.639	0	1	1
-47.5469	0	1	1
-25.4366	0	1	1
564.32	0	1	1
368.411	0	1	1
-45.0566	0	1	1
-52.9022	0	1	1
-15.2887	0	1	1
-78.3924	0	1	1
44.2226	0	1	1
-26.0074	0	1	1
171.401	0	1	1
701.851	0	1	1
308.571	0	1	1
135.249	0	1	1
67.233	0	1	1
-15.5825	0	1	1
132.781	0	1	1
78.5447	0	1	1
528.177	0	1	1
-40.082	0	1	1
-22.316	0	1	1
574.928	0	1	1
-19.7882	0	1	1
194.901	0	1	1
13.7073	0	1	1
33.7388	0	1	1
522.26	0	1	1
462.901	0	1	1
270.462	0	1	1
27.1424	0	1	1
39.4214	0	1	1
242.534	0	1	1
366.264	0	1	1
1444.19	0	1	1
419.609	0	1	1
1219.8	0	1	1
237.106	0	1	1
1383.23	0	1	1
2325.58	1	1	1
4493.12	0	1	1
1012.18	0	1	1
785.076	0	1	1
161.154	0	1	1
1297.36	1	1	1
1320.25	0	1	1
696.905	0	1	1
1607.36	0	1	1
1235.63	0	1	1
1086.89	0	1	1
911.297	0	1	1
690.11	0	1	1
962.531	0	1	1
722.582	0	1	1
63.4045	1	1	1
-11.911	0	1	1
582.436	0	1	1
1611.35	1	1	1
1904.36	0	1	1
149.94	0	1	1
546.823	0	1	1
1974.84	0	1	1
1731.01	0	1	1
634.156	1	1	1
789.826	0	1	1
338.306	0	1	1
359.507	0	1	1
448.544	0	1	1
731.446	0	1	1
347.108	1	1	1
374.36	0	1	1
345.417	0	1	1
657.975	1	1	1
-64.1328	0	1	1
241.328	0	1	1
288.509	0	1	1
134.195	0	1	1
800.965	1	1	1
555.13	0	1	1
1014.37	0	1	1
502.191	0	1	1
311.976	0	1	1
38.6569	0	1	1
251.402	0	1	1
922.244	1	1	1
333.396	0	1	1
675.788	0	1	1
808.034	0	1	1
-44.5217	0	1	1
-35.1447	1	1	1
-78.6609	0	1	1
-81.6162	0	1	1
-20.3139	0	1	1
-48.6476	0	1	1
4.22672	0	1	1
-69.241	0	1	1
-66.3488	0	1	1
-59.0367	0	1	1
40.2824	0	1	1
4.08958	0	1	1
-21.3023	0	1	1
-64.7176	0	1	1
-16.3461	0	1	1
62.4325	0	1	1
8.00156	0	1	1
43.6111	0	1	1
-69.1836	0	1	1
-30.4944	0	1	1
-9.18162	0	1	1
-59.6149	0	1	1
-65.4966	0	1	1
-65.2899	0	1	1
258.729	0	1	1
-3.2377	0	1	1
-60.4885	0	1	1
-64.151	0	1	1
-48.633	0	1	1
109.261	0	1	1
-13.2605	0	1	1
72.2349	0	1	1
175.434	0	1	1
-85.8117	1	1	1
6.50788	0	1	1
155.661	1	1	1
245.711	1	1	1
-26.2749	1	1	1
195.489	1	1	1
161.967	1	1	1
73.8729	0	1	1
118.339	0	1	1
133.898	1	1	1
-66.4944	0	1	1
115.19	0	1	1
35.5209	0	1	1
71.5144	1	1	1
167.476	0	1	1
-10.092	1	1	1
49.8513	1	1	1
41.1227	1	1	1
-48.7799	0	1	1
28.4788	1	1	1
25.7315	1	1	1
10.1221	1	1	1
15.3653	1	1	1
10.9246	1	1	1
138.175	1	1	1
36.9809	1	1	1
-54.4928	0	1	1
-7.47855	0	1	1
-50.5205	0	1	1
-9.43551	1	1	1
59.7655	1	1	1
81.9955	1	1	1
29.076	0	1	1
113.633	1	1	1
-9.82176	0	1	1
402.01	0	1	1
309.171	0	1	1
-34.4738	0	1	1
235.269	1	1	1
94.1382	0	1	1
290.128	1	1	1
397.057	0	1	1
190.484	0	1	1
1165.15	1	1	1
205.875	0	1	1
184.119	1	1	1
139.694	1	1	1
93.2986	1	1	1
-25.3987	0	1	1
104.108	1	1	1
336.248	1	1	1
96.6196	1	1	1
56.2284	1	1	1
114.376	1	1	1
69.8875	1	1	1
82.349	1	1	1
103.714	1	1	1
-64.7299	0	1	1
224.578	0	1	1
181.982	0	1	1
31.5175	1	1	1
156.627	0	1	1
172.631	0	1	1
100.273	0	1	1
82.9592	1	1	1
373.905	0	1	1
-11.0712	0	1	1
6.83705	1	1	1
-87.7944	0	1	1
-70.0658	0	1	1
-66.028	0	1	1
-93.6762	0	1	1
-73.45	0	1	1
-81.0795	0	1	1
-67.429	0	1	1
-89.9241	0	1	1
-75.6569	0	1	1
-67.9174	0	1	1
-62.7947	1	1	1
-51.3125	0	1	1
-66.4041	0	1	1
-29.3808	0	1	1
9.67698	0	1	1
-64.6638	0	1	1
-58.2005	1	1	1
-95.3945	0	1	1
-54.3656	0	1	1
-59.5539	0	1	1
-27.4751	1	1	1
-95.5182	0	1	1
13.3683	0	1	1
-68.2237	0	1	1
-77.7466	0	1	1
-96.3067	0	1	1
-95.2248	0	1	1
-63.4288	0	1	1
-65.0839	0	1	1
-25.9662	0	1	1
-24.4267	0	1	1
-54.603	0	1	1
-17.8453	0	1	1
7.59885	0	1	1
-47.0219	0	1	1
-27.121	0	1	1
33.6329	0	1	1
74.9604	0	1	1
-38.8748	0	1	1
-14.1606	0	1	1
-5.05491	0	1	1
-28.4203	0	1	1
-29.3449	0	1	1
3.61264	0	1	1
107.42	0	1	1
-24.1064	0	1	1
827.855	0	1	1
1263.12	0	1	1
1229.13	0	1	1
718.71	0	1	1
247.329	0	1	1
491.495	0	1	1
717.974	1	1	1
299.9	0	1	1
-70.297	0	1	1
11.0377	0	1	1
-61.4973	0	1	1
-44.6095	0	1	1
-65.2061	0	1	1
283.131	0	1	1
-50.8535	0	1	1
-47.3773	0	1	1
-36.1991	0	1	1
-30.9115	0	1	1
302.162	0	1	1
-42.5546	0	1	1
-56.6613	0	1	1
-52.3889	0	1	1
74.6166	0	1	1
-76.3556	0	1	1
448.666	0	1	1
-78.6737	0	1	1
252.609	0	1	1
-66.0758	0	1	1
-49.2544	0	1	1
18.9474	0	1	1
128.838	0	1	1
-34.6882	0	1	1
-61.1174	0	1	1
-2.25527	0	1	1
9.3654	0	1	1
40.9433	0	1	1
87.7268	0	1	1
1.47779	0	1	1
74.7689	0	1	1
35.8561	0	1	1
-31.6525	0	1	1
97.1859	0	1	1
-73.5358	0	1	1
89.6595	0	1	1
-27.8173	0	1	1
37.8783	0	1	1
-41.7554	0	1	1
20.0189	0	1	1
-24.4202	0	1	1
1.68546	0	1	1
114.313	0	1	1
233.643	0	1	1
13.9789	0	1	1
-28.4567	0	1	1
66.898	0	1	1
-46.803	0	1	1
1.31637	1	1	1
-1.68426	0	1	1
37.848	0	1	1
251.923	0	1	1
47.0219	0	1	1
91.874	0	1	1
182.777	0	1	1
70.0382	0	1	1
80.9886	0	1	1
-24.9776	0	1	1
-49.2967	0	1	1
38.4887	0	1	1
27.078	0	1	1
61.8838	0	1	1
153.401	1	1	1
32.7075	0	1	1
24.7154	0	1	1
20.8619	0	1	1
-13.7754	0	1	1
127.61	0	1	1
-8.96996	0	1	1
-11.2254	0	1	1
-71.5048	0	1	1
-70.6098	0	1	1
-77.4535	0	1	1
-63.2488	0	1	1
-80.7171	0	1	1
-66.9037	0	1	1
-82.5991	0	1	1
-63.2918	0	1	1
-60.3914	0	1	1
-87.503	0	1	1
-71.0504	1	1	1
-87.6322	0	1	1
-71.9433	1	1	1
-84.8422	0	1	1
-59.0811	0	1	1
-57.8623	1	1	1
-38.8158	0	1	1
-63.5639	0	1	1
-82.0904	0	1	1
-66.4614	0	1	1
-62.9329	0	1	1
-73.6513	0	1	1
-93.7664	0	1	1
-87.4199	0	1	1
-79.1789	0	1	1
-59.6313	0	1	1
-69.3871	0	1	1
-64.8556	0	1	1
-64.3953	0	1	1
-71.3307	0	1	1
-73.9333	0	1	1
-74.2152	1	1	1
-77.2883	0	1	1
-68.6884	1	1	1
-81.9936	1	1	1
-80.4022	0	1	1
-68.3272	0	1	1
-70.9903	0	1	1
-63.4301	0	1	1
-84.8787	0	1	1
-59.4425	0	1	1
-75.5765	0	1	1
-61.9434	0	1	1
-75.0576	0	1	1
-77.1544	0	1	1
-36.0274	0	1	1
-85.1617	0	1	1
-63.8097	1	1	1
-76.2031	0	1	1
-68.5286	0	1	1
157.489	0	1	1
27.9667	0	1	1
8.85497	0	1	1
240.851	0	1	1
99.5528	0	1	1
148.226	0	1	1
147.42	0	1	1
434.601	0	1	1
142.761	0	1	1
474.409	0	1	1
249.299	0	1	1
136.568	0	1	1
34.6803	0	1	1
260.812	0	1	1
258.833	0	1	1
2541.93	0	1	1
590.54	0	1	1
1967.74	0	1	1
582.271	0	1	1
231.494	0	1	1
861.087	0	1	1
717.37	0	1	1
275.827	0	1	1
34.2278	0	1	1
668.783	0	1	1
438.111	0	1	1
591.756	0	1	1
129.848	0	1	1
50.8458	0	1	1
325.711	0	1	1
102.024	1	1	1
865.789	0	1	1
-7.29051	1	1	1
1417.19	0	1	1
557.163	0	1	1
901.756	0	1	1
735.145	0	1	1
772.533	0	1	1
212.281	0	1	1
187.269	0	1	1
550.653	0	1	1
1881.18	0	1	1
1015.09	1	1	1
473.144	0	1	1
831.132	1	1	1
288.803	1	1	1
817.288	0	1	1
805.895	0	1	1
484.334	0	1	1
681.39	0	1	1
247.657	1	1	1
384.17	0	1	1
713.041	0	1	1
15.351	1	1	1
-45.2524	1	1	1
70.6146	0	1	1
671.5	0	1	1
136.211	0	1	1
239.507	1	1	1
1117.94	0	1	1
212.418	0	1	1
-8.04568	1	1	1
150.266	1	1	1
332.227	1	1	1
112.644	0	1	1
-86.0833	0	1	2
-59.9986	1	1	2
-80.2384	1	1	2
-90.1263	1	1	2
-79.8778	0	1	2
-69.6256	0	1	2
-50.0541	0	1	2
-61.1162	1	1	2
-46.5448	0	1	2
-77.36	1	1	2
-83.745	0	1	2
-75.7897	0	1	2
-85.887	0	1	2
-93.24	0	1	2
554.008	1	1	2
1290.11	1	1	2
1043.75	1	1	2
1290.31	0	1	2
1073.78	0	1	2
1299.19	0	1	2
694.833	0	1	2
1442.92	0	1	2
412.029	1	1	2
492.786	1	1	2
557.529	0	1	2
549.212	0	1	2
542.935	0	1	2
715.147	0	1	2
287.54	0	1	2
768.702	1	1	2
536.975	0	1	2
464.772	0	1	2
221.737	0	1	2
250.568	0	1	2
381.405	0	1	2
748.532	1	1	2
285.116	0	1	2
535.042	0	1	2
796.837	0	1	2
313.049	1	1	2
1097.53	0	1	2
952.401	0	1	2
106.115	0	1	2
732.665	0	1	2
54.1972	0	1	2
149.304	1	1	2
760.391	0	1	2
935.125	0	1	2
940.677	0	1	2
230.795	0	1	2
265.079	1	1	2
-13.2571	0	1	2
-14.5786	0	1	2
-54.3485	0	1	2
-78.0353	0	1	2
93.9599	0	1	2
-81.0989	0	1	2
-72.2782	0	1	2
-70.3605	1	1	2
-47.9477	0	1	2
233.926	0	1	2
-32.1869	0	1	2
21.6082	0	1	2
334.09	0	1	2
78.847	0	1	2
1.12353	0	1	2
236.366	0	1	2
84.3073	0	1	2
238.455	0	1	2
421.122	0	1	2
285.566	0	1	2
67.8672	0	1	2
-28.2913	0	1	2
182.704	0	1	2
-50.2665	0	1	2
-48.9732	0	1	2
-55.8815	0	1	2
10.9239	0	1	2
-52.4861	0	1	2
-40.0254	0	1	2
-64.8066	0	1	2
-44.4478	0	1	2
-60.5206	0	1	2
-38.663	0	1	2
-85.8353	0	1	2
-85.8838	0	1	2
-54.5739	0	1	2
-84.9612	0	1	2
1202.6	0	1	2
3971.65	0	1	2
620.211	0	1	2
759.849	0	1	2
1688.43	0	1	2
977.68	0	1	2
1103.14	0	1	2
746.741	0	1	2
18751	0	1	2
14640.4	0	1	2
358.112	0	1	2
1625.31	0	1	2
11125	0	1	2
3920.95	0	1	2
1016.91	0	1	2
283.149	0	1	2
233.965	0	1	2
170.247	0	1	2
197.721	1	1	2
896.083	0	1	2
369.721	0	1	2
1752.69	0	1	2
293.575	1	1	2
783.626	0	1	2
3033.35	0	1	2
203.491	0	1	2
562.678	0	1	2
1349.58	0	1	2
261.528	0	1	2
666.121	1	1	2
641.081	0	1	2
2295.39	1	1	2
795.95	0	1	2
759.796	1	1	2
1219.35	0	1	2
329.874	0	1	2
771.249	0	1	2
1036.35	0	1	2
598.181	1	1	2
1057.81	0	1	2
809.865	0	1	2
708.441	1	1	2
439.063	1	1	2
638.715	0	1	2
891.467	0	1	2
162.498	0	1	2
297.924	0	1	2
179.122	0	1	2
266.093	0	1	2
275.733	0	1	2
144.424	0	1	2
513.535	0	1	2
126.032	0	1	2
193.281	1	1	2
487.624	0	1	2
428.559	1	1	2
168.688	0	1	2
362.07	0	1	2
68.4548	0	1	2
309.479	0	1	2
335.887	0	1	2
214.591	1	1	2
382.501	0	1	2
4.80351	0	1	2
134.819	0	1	2
1187.77	0	1	2
693.392	0	1	2
814.923	0	1	2
37.0188	0	1	2
-13.1086	0	1	2
-19.3958	0	1	2
72.7648	0	1	2
1899.76	0	1	2
341.25	0	1	2
-18.8741	0	1	2
423.178	0	1	2
-0.775257	0	1	2
95.5551	0	1	2
-13.121	0	1	2
84.4763	0	1	2
22.1067	1	1	2
281.286	0	1	2
-8.01853	0	1	2
92.2464	0	1	2
1475.95	0	1	2
2057.29	0	1	2
2531.75	0	1	2
949.868	0	1	2
786.139	1	1	2
1493.98	0	1	2
1914.74	0	1	2
1767.77	0	1	2
1235.52	0	1	2
1459.1	1	1	2
1590.52	0	1	2
1689.26	0	1	2
1837.73	1	1	2
1452.63	0	1	2
2331.15	0	1	2
2252.02	0	1	2
2640.63	0	1	2
2102.4	0	1	2
347.3	0	1	2
1508.74	0	1	2
3277.56	0	1	2
1210.32	0	1	2
863.116	1	1	2
1518	0	1	2
1707.21	0	1	2
686.133	0	1	2
813.85	0	1	2
2745.97	0	1	2
951.953	0	1	2
373.224	1	1	2
1578.47	1	1	2
1528.24	1	1	2
504.125	0	1	2
754.427	0	1	2
5031.05	0	1	2
737.425	0	1	2
400.427	1	1	2
2861.88	1	1	2
1633.74	1	1	2
1264.52	1	1	2
133.265	1	1	2
511.962	0	1	2
221.593	1	1	2
325.459	0	1	2
60.557	0	1	2
17.3823	1	1	2
276.966	0	1	2
477.647	1	1	2
478.776	0	1	2
1015.75	1	1	2
364.602	0	1	2
166.194	0	1	2
287.188	0	1	2
415.446	0	1	2
791.017	1	1	2
455.835	0	1	2
15.8481	0	1	2
-87.727	0	1	2
-65.9124	0	1	2
-67.93	0	1	2
-28.1368	0	1	2
15.3111	0	1	2
-45.5044	0	1	2
39.4904	0	1	2
15.7938	0	1	2
98.0863	0	1	2
-10.6218	0	1	2
-39.8562	0	1	2
-12.7715	0	1	2
24.3772	0	1	2
59.213	0	1	2
-60.2389	0	1	2
52.849	0	1	2
223.775	0	1	2
-20.7126	0	1	2
365.266	0	1	2
109.714	0	1	2
78.1326	0	1	2
52.2955	0	1	2
184.899	0	1	2
199.024	0	1	2
178.982	0	1	2
-38.7596	0	1	2
28.2278	0	1	2
121.505	0	1	2
71.34	0	1	2
-72.7032	0	1	2
35.5344	0	1	2
-26.1591	0	1	2
12.9723	1	1	2
-31.1074	0	1	2
-70.1988	0	1	2
83.1188	0	1	2
36.9713	0	1	2
-21.569	0	1	2
41.5168	0	1	2
-46.7007	0	1	2
121.384	0	1	2
41.8684	0	1	2
-49.9281	0	1	2
40.6154	0	1	2
-15.1161	0	1	2
27.887	1	1	2
-17.2437	0	1	2
182.077	0	1	2
2.3005	0	1	2
-5.65054	0	1	2
-2.61682	0	1	2
-22.7219	0	1	2
51.2948	0	1	2
-3.69402	0	1	2
-7.78414	0	1	2
33.732	0	1	2
70.8	0	1	2
-58.0469	0	1	2
-8.03204	0	1	2
74.338	0	1	2
-12.7638	0	1	2
-36.3715	0	1	2
6.59613	0	1	2
-30.8528	0	1	2
-18.3256	0	1	2
23.2284	0	1	2
7.98308	0	1	2
-65.2579	0	1	2
-10.2774	0	1	2
64.9558	0	1	2
20.389	0	1	2
-12.3756	0	1	2
94.2012	0	1	2
-32.2486	0	1	2
-14.6265	0	1	2
-8.38235	0	1	2
-9.26649	0	1	2
-35.9435	0	1	2
-6.59332	0	1	2
-13.414	0	1	2
2116.68	0	1	2
295.82	0	1	2
129.055	0	1	2
185.667	0	1	2
262.379	0	1	2
4.333	0	1	2
232.653	0	1	2
366.733	0	1	2
300.733	1	1	2
276.588	0	1	2
230.437	0	1	2
554.262	0	1	2
185.272	0	1	2
527.86	0	1	2
291.837	0	1	2
4.75064	0	1	2
-15.0565	0	1	2
29.7424	0	1	2
317.633	0	1	2
28.7827	1	1	2
208.706	0	1	2
228.439	0	1	2
51.9209	0	1	2
282.965	0	1	2
296.566	0	1	2
501.592	0	1	2
203.536	0	1	2
216.239	0	1	2
219.236	0	1	2
369.019	0	1	2
63.6177	0	1	2
871.962	0	1	2
1669.49	0	1	2
734.433	0	1	2
482.391	0	1	2
1253.28	0	1	2
-45.2664	0	1	2
589.214	1	1	2
748.115	0	1	2
988.922	1	1	2
-55.8988	1	1	2
0.12985	0	1	2
37.8679	0	1	2
3.97352	0	1	2
-37.3565	1	1	2
-3.47831	0	1	2
54.0496	0	1	2
80.9087	0	1	2
177.892	0	1	2
47.7243	0	1	2
106.369	0	1	2
109.176	0	1	2
39.2089	0	1	2
140.876	1	1	2
22.6823	0	1	2
521.295	0	1	2
-1.79737	0	1	2
28.4098	0	1	2
41.9685	0	1	2
103.353	0	1	2
116.097	0	1	2
-25.9691	0	1	2
152.506	0	1	2
-17.3497	0	1	2
120.802	0	1	2
-1.54361	0	1	2
112.184	0	1	2
139.804	0	1	2
-25.6661	0	1	2
143.441	0	1	2
28.6154	0	1	2
46.2463	1	1	2
-40.8239	0	1	2
-8.89768	0	1	2
-21.2839	0	1	2
112.159	1	1	2
29.5883	1	1	2
203.665	0	1	2
102.973	0	1	2
111.829	0	1	2
17.5191	0	1	2
146.624	0	1	2
100.295	1	1	2
57.1089	0	1	2
37.9006	0	1	2
42.7973	0	1	2
241.213	0	1	2
-12.118	1	1	2
37.4462	0	1	2
3.77831	0	1	2
49.9627	0	1	2
-30.8057	0	1	2
14.4865	0	1	2
94.4916	0	1	2
18.5698	0	1	2
-37.2406	0	1	2
-76.8604	0	1	2
13.5361	1	1	2
11.4885	0	1	2
-35.8959	0	1	2
-28.0151	0	1	2
-9.74963	0	1	2
-61.5967	0	1	2
12.8379	0	1	2
16.9376	0	1	2
-73.4354	0	1	2
-39.4264	0	1	2
-39.4972	0	1	2
20.3081	0	1	2
44.3066	0	1	2
-16.6273	1	1	2
-77.0275	1	1	2
-29.5257	1	1	2
-58.2268	0	1	2
12.1731	0	1	2
132.166	0	1	2
-55.864	0	1	2
-36.0308	0	1	2
-41.8944	0	1	2
-38.3235	0	1	2
-37.0783	0	1	2
-24.2245	0	1	2
-20.2592	0	1	2
125.246	0	1	2
-52.6088	0	1	2
-30.4381	0	1	2
-74.2767	0	1	2
-18.5325	1	1	2
4.38949	0	1	2
-29.5597	0	1	2
38.6137	0	1	2
184.998	0	1	2
-58.7657	0	1	2
2.08631	0	1	2
-44.8788	0	1	2
72.384	0	1	2
-47.9257	0	1	2
-18.4548	0	1	2
-60.911	0	1	2
-59.0388	0	1	2
-15.5257	0	1	2
-32.1631	0	1	2
28.3795	0	1	2
-77.2591	0	1	2
-18.104	0	1	2
-23.0992	0	1	2
291.235	0	1	2
1062.16	0	1	2
485.218	0	1	2
233.054	0	1	2
131.139	0	1	2
13.9108	0	1	2
228.682	0	1	2
151.217	0	1	2
777.054	0	1	2
-18.539	0	1	2
3.10786	0	1	2
843.984	0	1	2
7.62099	0	1	2
316.896	0	1	2
73.6075	0	1	2
80.5081	0	1	2
690.147	0	1	2
619.365	0	1	2
374.127	0	1	2
60.1682	0	1	2
86.423	0	1	2
356.81	0	1	2
468.885	0	1	2
1861.51	0	1	2
551.912	0	1	2
1646.34	0	1	2
316.255	0	1	2
1129.43	0	1	2
1985.09	1	1	2
1100.82	0	1	2
814.98	0	1	2
608.478	0	1	2
116.335	0	1	2
1044.16	1	1	2
1060.58	0	1	2
551.297	0	1	2
1348.47	0	1	2
1011.25	0	1	2
882.143	0	1	2
728.943	0	1	2
542.064	0	1	2
677.86	0	1	2
562.332	0	1	2
17.5255	1	1	2
-38.8707	0	1	2
491.316	0	1	2
1276.03	1	1	2
1487.62	0	1	2
84.1986	0	1	2
405.916	0	1	2
1451.19	0	1	2
1386.2	0	1	2
619.006	1	1	2
769.493	0	1	2
395.596	0	1	2
326.39	0	1	2
413.674	0	1	2
709.304	0	1	2
330.205	1	1	2
353.625	0	1	2
316.198	0	1	2
651.298	1	1	2
-65.7789	0	1	2
221.866	0	1	2
279.752	0	1	2
109.225	0	1	2
717.463	1	1	2
502.909	0	1	2
922.359	0	1	2
454.678	0	1	2
279.999	0	1	2
24.3195	0	1	2
227.818	0	1	2
848.943	1	1	2
309.132	0	1	2
606.894	0	1	2
745.392	0	1	2
-11.6299	0	1	2
2.59533	1	1	2
-64.4566	0	1	2
-72.2379	0	1	2
29.0482	0	1	2
-16.1268	0	1	2
66.1361	0	1	2
-48.9958	0	1	2
-40.9985	0	1	2
-52.1838	0	1	2
55.741	0	1	2
11.5216	0	1	2
-11.8264	0	1	2
-60.1324	0	1	2
-2.09802	0	1	2
87.346	0	1	2
22.6671	0	1	2
71.0678	0	1	2
-64.8149	0	1	2
-18.9731	0	1	2
4.69986	0	1	2
-53.1474	0	1	2
-59.7141	0	1	2
-58.4468	0	1	2
314.679	0	1	2
9.62425	0	1	2
-54.763	0	1	2
-60.5436	0	1	2
-43.5069	0	1	2
131.234	0	1	2
-2.86288	0	1	2
74.8826	0	1	2
134.491	0	1	2
-92.5314	1	1	2
9.31613	0	1	2
152.635	1	1	2
234.937	1	1	2
-28.6633	1	1	2
195.824	1	1	2
134.126	1	1	2
5.7866	0	1	2
106.347	0	1	2
139.809	1	1	2
-69.882	0	1	2
105.418	0	1	2
35.2731	0	1	2
60.878	1	1	2
145.15	0	1	2
-23.7805	1	1	2
17.2028	1	1	2
22.1516	1	1	2
-59.5646	0	1	2
13.9941	1	1	2
9.74733	1	1	2
-8.00402	1	1	2
4.91851	1	1	2
-2.14489	1	1	2
-7.29632	1	1	2
26.1704	1	1	2
-38.3156	0	1	2
-17.25	0	1	2
-55.6303	0	1	2
-16.4837	1	1	2
50.1219	1	1	2
65.6617	1	1	2
-9.833	0	1	2
96.3677	1	1	2
79.8079	0	1	2
896.431	0	1	2
714.179	0	1	2
30.1242	0	1	2
627.797	1	1	2
260.303	0	1	2
565.728	1	1	2
1119.61	0	1	2
460.032	0	1	2
2538.67	1	1	2
508.353	0	1	2
879.844	1	1	2
592.201	1	1	2
525.891	1	1	2
144.483	0	1	2
490.93	1	1	2
1182.95	1	1	2
454.424	1	1	2
375.284	1	1	2
655.065	1	1	2
475.093	1	1	2
621.688	1	1	2
287.393	1	1	2
122.478	0	1	2
847.04	0	1	2
649.858	0	1	2
314.941	1	1	2
698.467	0	1	2
840.225	0	1	2
552.255	0	1	2
470.142	1	1	2
808.289	0	1	2
1.10575	0	1	2
20.5959	1	1	2
-80.7115	0	1	2
-65.7466	0	1	2
-58.6822	0	1	2
-92.1929	0	1	2
-64.1946	0	1	2
-74.7757	0	1	2
-57.043	0	1	2
-86.6139	0	1	2
-69.1385	0	1	2
-58.3663	0	1	2
-52.0181	1	1	2
-35.3048	0	1	2
-54.6615	0	1	2
2.74308	0	1	2
47.9806	0	1	2
-51.7792	0	1	2
-38.6627	1	1	2
-95.6571	0	1	2
-41.4888	0	1	2
-49.1857	0	1	2
-18.164	1	1	2
-95.0446	0	1	2
30.7596	0	1	2
-64.4684	0	1	2
-73.6825	0	1	2
-95.3313	0	1	2
-93.9223	0	1	2
-57.5953	0	1	2
-58.349	0	1	2
-14.9864	0	1	2
-13.8421	0	1	2
-47.3466	0	1	2
-6.26958	0	1	2
23.0226	0	1	2
-43.4882	0	1	2
-15.7115	0	1	2
42.007	0	1	2
93.2433	0	1	2
-37.5246	0	1	2
-7.37589	0	1	2
6.84527	0	1	2
-22.8477	0	1	2
-23.6886	0	1	2
10.381	0	1	2
127.236	0	1	2
-18.5547	0	1	2
533.633	0	1	2
845.967	0	1	2
801.352	0	1	2
497.636	0	1	2
141.798	0	1	2
328.564	0	1	2
490.719	1	1	2
193.493	0	1	2
-64.6468	0	1	2
107.762	0	1	2
-26.5856	0	1	2
8.11321	0	1	2
-37.8129	0	1	2
637.858	0	1	2
-13.8126	0	1	2
4.49291	0	1	2
24.1298	0	1	2
33.3635	0	1	2
645.672	0	1	2
5.56036	0	1	2
-22.1288	0	1	2
-19.8348	0	1	2
229.417	0	1	2
-57.6941	0	1	2
909.028	0	1	2
-67.6956	0	1	2
567.195	0	1	2
-45.6137	0	1	2
-4.79683	0	1	2
121.122	0	1	2
323.349	0	1	2
12.6046	0	1	2
-22.9834	0	1	2
99.108	0	1	2
94.9269	0	1	2
166.63	0	1	2
250.469	0	1	2
70.6131	0	1	2
212.062	0	1	2
172.299	0	1	2
29.263	0	1	2
281.893	0	1	2
-54.28	0	1	2
253.392	0	1	2
24.0492	0	1	2
153.1	0	1	2
-7.35061	0	1	2
112.894	0	1	2
29.8956	0	1	2
77.9595	0	1	2
309.246	0	1	2
517.979	0	1	2
107.878	0	1	2
37.1379	0	1	2
216.79	0	1	2
8.48289	0	1	2
78.9295	1	1	2
82.8861	0	1	2
141.39	0	1	2
559.078	0	1	2
170.62	0	1	2
249.089	0	1	2
438.345	0	1	2
193.825	0	1	2
230.451	0	1	2
36.9513	0	1	2
-15.4705	0	1	2
157.031	0	1	2
126.993	0	1	2
198.076	0	1	2
363.481	1	1	2
161.19	0	1	2
130.044	0	1	2
132.829	0	1	2
56.4091	0	1	2
335.4	0	1	2
66.1599	0	1	2
67.659	0	1	2
-57.1322	0	1	2
-56.9682	0	1	2
-51.2531	0	1	2
-16.2155	0	1	2
-56.1665	0	1	2
-10.5447	0	1	2
-50.5265	0	1	2
-11.6327	0	1	2
-25.1746	0	1	2
-78.8207	0	1	2
-47.6044	1	1	2
-75.1186	0	1	2
-32.7987	1	1	2
-62.1863	0	1	2
-10.611	0	1	2
-0.459305	1	1	2
48.1748	0	1	2
-14.1762	0	1	2
-51.5753	0	1	2
-13.277	0	1	2
-18.9818	0	1	2
-38.4429	0	1	2
-79.6455	0	1	2
-72.1501	0	1	2
-45.8627	0	1	2
-34.0264	0	1	2
-21.958	0	1	2
-15.6099	0	1	2
-34.5424	0	1	2
-28.0662	0	1	2
-41.6997	0	1	2
-30.518	1	1	2
10.5063	0	1	2
-40.062	1	1	2
-39.0757	1	1	2
-47.8949	0	1	2
-32.3865	0	1	2
-37.5297	0	1	2
19.2211	0	1	2
-74.7131	0	1	2
-11.8279	0	1	2
12.0059	0	1	2
-14.161	0	1	2
-49.2276	0	1	2
-14.8371	0	1	2
59.2984	0	1	2
-74.1912	0	1	2
-18.8956	1	1	2
-63.8879	0	1	2
-1.29823	0	1	2
222.751	0	1	2
85.9252	0	1	2
41.5887	0	1	2
586.77	0	1	2
137.635	0	1	2
186.242	0	1	2
188.128	0	1	2
505.976	0	1	2
166.116	0	1	2
560.393	0	1	2
275.312	0	1	2
185.199	0	1	2
52.5152	0	1	2
311.114	0	1	2
308.527	0	1	2
2861.16	0	1	2
709.956	0	1	2
2184.24	0	1	2
650.656	0	1	2
292.843	0	1	2
908.565	0	1	2
799.937	0	1	2
301.234	0	1	2
24.9095	0	1	2
690.442	0	1	2
458.211	0	1	2
628.693	0	1	2
129.032	0	1	2
-10.4604	0	1	2
326.473	0	1	2
146.076	1	1	2
936.481	0	1	2
-21.7449	1	1	2
1542.89	0	1	2
654.366	0	1	2
979.695	0	1	2
802.931	0	1	2
829.475	0	1	2
216.604	0	1	2
230.624	0	1	2
660.764	0	1	2
1983.42	0	1	2
1039.43	1	1	2
535.7	0	1	2
904.303	1	1	2
268.844	1	1	2
927.553	0	1	2
897.089	0	1	2
427.394	0	1	2
745.03	0	1	2
278.609	1	1	2
420.054	0	1	2
770.234	0	1	2
42.3772	1	1	2
-48.8982	1	1	2
76.0676	0	1	2
668.648	0	1	2
126.353	0	1	2
266.021	1	1	2
1211.7	0	1	2
232.275	0	1	2
-17.2006	1	1	2
179.707	1	1	2
384.496	1	1	2
128.697	0	1	2
-1.39343	0	1	3
-68.1797	1	1	3
-64.0544	1	1	3
-89.5842	1	1	3
-43.1542	0	1	3
-50.5654	0	1	3
1.34418	0	1	3
-62.6602	1	1	3
-51.9205	0	1	3
-49.7975	1	1	3
-21.869	0	1	3
-82.7991	0	1	3
-82.2029	0	1	3
-47.8376	0	1	3
210.422	1	1	3
604.887	1	1	3
519.69	1	1	3
642.933	0	1	3
449.71	0	1	3
594.831	0	1	3
251.919	0	1	3
659.848	0	1	3
214.702	1	1	3
275.311	1	1	3
306.603	0	1	3
294.659	0	1	3
246.172	0	1	3
430.62	0	1	3
110.977	0	1	3
505.319	1	1	3
331.645	0	1	3
279.342	0	1	3
111.972	0	1	3
133.645	0	1	3
223.595	0	1	3
492.122	1	1	3
161.303	0	1	3
304.057	0	1	3
520.556	0	1	3
182.945	1	1	3
720.57	0	1	3
607.486	0	1	3
45.9799	0	1	3
451.677	0	1	3
7.65566	0	1	3
-21.4707	1	1	3
-99.9969	0	1	3
-99.9967	0	1	3
-99.977	0	1	3
-99.9895	0	1	3
-99.9964	1	1	3
-44.4	0	1	3
-6.99941	0	1	3
68.5251	0	1	3
-89.2764	0	1	3
49.2963	0	1	3
-89.1825	0	1	3
-51.5828	0	1	3
-63.7713	1	1	3
-62.0017	0	1	3
153.038	0	1	3
-49.6063	0	1	3
-11.301	0	1	3
210.525	0	1	3
85.2172	0	1	3
-20.6719	0	1	3
96.893	0	1	3
21.8127	0	1	3
132.327	0	1	3
228.161	0	1	3
125.953	0	1	3
-25.5199	0	1	3
48.8857	0	1	3
-47.7673	0	1	3
-41.3641	0	1	3
0.70734	0	1	3
-73.165	0	1	3
64.877	0	1	3
-20.2997	0	1	3
-5.34928	0	1	3
-35.5944	0	1	3
-29.6605	0	1	3
-36.2715	0	1	3
23.2981	0	1	3
-71.6195	0	1	3
-75.7141	0	1	3
-25.6011	0	1	3
-80.6181	0	1	3
1458.81	0	1	3
1500.98	0	1	3
795.448	0	1	3
881.263	0	1	3
2081.43	0	1	3
984.965	0	1	3
1267.05	0	1	3
942.624	0	1	3
2290.72	0	1	3
1659.89	0	1	3
488.732	0	1	3
1246.62	0	1	3
3567.33	0	1	3
1439.48	0	1	3
1203.92	0	1	3
1094.04	0	1	3
865.165	0	1	3
560.854	0	1	3
673.347	1	1	3
476.054	0	1	3
1010.85	0	1	3
2199.89	0	1	3
1081.77	1	1	3
2259.48	0	1	3
4322.89	0	1	3
824.102	0	1	3
1277.83	0	1	3
2299.95	0	1	3
1050.33	0	1	3
809.031	1	1	3
768.041	0	1	3
2727.42	1	1	3
927.574	0	1	3
892.261	1	1	3
1435.59	0	1	3
389.946	0	1	3
900.649	0	1	3
1208.66	0	1	3
725.156	1	1	3
1276.82	0	1	3
956.512	0	1	3
822.57	1	1	3
517.817	1	1	3
753.981	0	1	3
1006.89	0	1	3
193.04	0	1	3
392.804	0	1	3
227.588	0	1	3
325.15	0	1	3
345.275	0	1	3
184.347	0	1	3
631.377	0	1	3
170.441	0	1	3
244.228	1	1	3
604.058	0	1	3
535.569	1	1	3
221.027	0	1	3
450.116	0	1	3
101.522	0	1	3
383.112	0	1	3
401.993	0	1	3
270.859	1	1	3
447.864	0	1	3
-26.1533	0	1	3
77.2797	0	1	3
900.155	0	1	3
513.762	0	1	3
623.323	0	1	3
1.08417	0	1	3
-34.7576	0	1	3
-41.3436	0	1	3
44.5975	0	1	3
1601.03	0	1	3
256.021	0	1	3
-29.8858	0	1	3
334.874	0	1	3
52.2	0	1	3
223.574	0	1	3
47.6072	0	1	3
216.976	0	1	3
94.7254	1	1	3
530.159	0	1	3
50.5531	0	1	3
240.103	0	1	3
1491.31	0	1	3
2081.64	0	1	3
2712.17	0	1	3
1013.2	0	1	3
708.827	1	1	3
1510.61	0	1	3
2095.53	0	1	3
1830.61	0	1	3
1235	0	1	3
1446.5	1	1	3
1642.05	0	1	3
1769.34	0	1	3
1819.78	1	1	3
1577.66	0	1	3
2542.67	0	1	3
2357.98	0	1	3
2767.72	0	1	3
2187.48	0	1	3
349.433	0	1	3
1574.84	0	1	3
3453.04	0	1	3
1483.05	0	1	3
1072.93	1	1	3
1876.46	0	1	3
2115.29	0	1	3
904.355	0	1	3
1025.17	0	1	3
3564.8	0	1	3
983.53	0	1	3
331.472	1	1	3
1624.06	1	1	3
1248.75	1	1	3
529.205	0	1	3
795.209	0	1	3
477.145	0	1	3
549.855	0	1	3
458.776	1	1	3
1591.2	1	1	3
877.369	1	1	3
789.484	1	1	3
267.524	1	1	3
590.028	0	1	3
380.45	1	1	3
657.895	0	1	3
309.988	0	1	3
89.651	1	1	3
456.706	0	1	3
856.191	1	1	3
806.122	0	1	3
676.332	1	1	3
621.262	0	1	3
276.197	0	1	3
465.749	0	1	3
835.052	0	1	3
1075.86	1	1	3
803.756	0	1	3
191.019	0	1	3
-70.6416	0	1	3
-12.9365	0	1	3
-20.033	0	1	3
90.1664	0	1	3
201.886	0	1	3
49.0105	0	1	3
134.703	0	1	3
104.622	0	1	3
217.633	0	1	3
48.9066	0	1	3
-1.20286	0	1	3
51.0578	0	1	3
121.224	0	1	3
188.262	0	1	3
-38.3828	0	1	3
176.514	0	1	3
467.739	0	1	3
22.8679	0	1	3
682.033	0	1	3
236.742	0	1	3
190.342	0	1	3
150.145	0	1	3
366.93	0	1	3
381.454	0	1	3
346.494	0	1	3
19.9142	0	1	3
[truncated: 1,046,576+ more rows]

## Sheet: Fig. S3a
BandPower	bool_idxsecho	freq_band	channel						Frequency bands					ch: 1-16 FAF; 16-32 AC
-88.1097	0	1	1						1. delta
-48.8984	1	1	1						2. theta
-80.3425	1	1	1						3. alpha
-82.3694	1	1	1						4. beta1
-85.9677	0	1	1						5. beta2
-80.1643	0	1	1						6. gamma1
-68.2443	0	1	1						7. gamma2
-67.471	1	1	1						8. gamma3
-57.106	0	1	1
-81.5845	1	1	1
-78.1664	0	1	1
-67.0732	0	1	1
-84.1484	0	1	1
-93.027	0	1	1
652.763	1	1	1
1509.96	1	1	1
1057.8	1	1	1
1476.22	0	1	1
1303.05	0	1	1
1450.31	0	1	1
831.436	0	1	1
1633.66	0	1	1
700.923	1	1	1
797.828	1	1	1
912.24	0	1	1
968.423	0	1	1
824.345	0	1	1
1128.97	0	1	1
1622.65	0	1	1
1190.01	1	1	1
773.356	0	1	1
672.34	0	1	1
318.255	0	1	1
381.486	0	1	1
541.418	0	1	1
1002.87	1	1	1
435.408	0	1	1
760.241	0	1	1
1146.48	0	1	1
469.549	1	1	1
1527.03	0	1	1
1322.67	0	1	1
211.028	0	1	1
984.166	0	1	1
113.637	0	1	1
224.867	1	1	1
1054.63	0	1	1
1281.58	0	1	1
1274.26	0	1	1
331.356	0	1	1
386.505	1	1	1
26.1487	0	1	1
0.631937	0	1	1
144.879	0	1	1
-46.0559	0	1	1
84.1034	0	1	1
-23.3483	0	1	1
1246.1	0	1	1
49.4088	1	1	1
203.73	0	1	1
288.161	0	1	1
-10.801	0	1	1
34.9037	0	1	1
-19.0339	0	1	1
77.3445	0	1	1
-71.8914	0	1	1
260.445	0	1	1
-67.8324	0	1	1
20.905	0	1	1
8.58699	0	1	1
-6.59325	0	1	1
38.6358	0	1	1
26.8846	0	1	1
154.968	0	1	1
-20.1433	0	1	1
-35.8136	0	1	1
-51.889	0	1	1
13.4963	0	1	1
-53.3866	0	1	1
-39.6342	0	1	1
-66.3994	0	1	1
-50.0964	0	1	1
-63.8081	0	1	1
-40.6749	0	1	1
-88.6858	0	1	1
-89.1195	0	1	1
-63.9359	0	1	1
-89.8592	0	1	1
24.8948	0	1	1
7974.61	0	1	1
-32.0303	0	1	1
-8.3566	0	1	1
109.066	0	1	1
175.777	0	1	1
257.436	0	1	1
-19.256	0	1	1
1433.93	0	1	1
4176.5	0	1	1
-85.2765	0	1	1
405.201	0	1	1
4760.37	0	1	1
291.23	0	1	1
-19.4861	0	1	1
-77.2048	0	1	1
-75.4416	0	1	1
-80.9605	0	1	1
-71.167	1	1	1
91.9938	0	1	1
-39.2709	0	1	1
1115.64	0	1	1
-96.079	1	1	1
26.2243	0	1	1
427.974	0	1	1
-99.9837	0	1	1
-98.5972	0	1	1
-99.9996	0	1	1
-99.9995	0	1	1
768.343	1	1	1
748.788	0	1	1
2598.05	1	1	1
917.884	0	1	1
873.257	1	1	1
1422.29	0	1	1
414.884	0	1	1
916.101	0	1	1
1170.96	0	1	1
722.558	1	1	1
1274.06	0	1	1
961.69	0	1	1
854.578	1	1	1
556.176	1	1	1
774.673	0	1	1
1102.87	0	1	1
218.266	0	1	1
384.194	0	1	1
241.609	0	1	1
344.747	0	1	1
333.242	0	1	1
186.744	0	1	1
614.127	0	1	1
175.484	0	1	1
244.269	1	1	1
587.312	0	1	1
515.938	1	1	1
226.269	0	1	1
449.384	0	1	1
93.9215	0	1	1
389.742	0	1	1
415.093	0	1	1
276.095	1	1	1
484.171	0	1	1
72.7544	0	1	1
259.83	0	1	1
1575.26	0	1	1
971.09	0	1	1
1114.73	0	1	1
84.8853	0	1	1
10.8318	0	1	1
7.92851	0	1	1
136.703	0	1	1
2443.29	0	1	1
442.236	0	1	1
0.185398	0	1	1
557.525	0	1	1
-28.0084	0	1	1
31.5485	0	1	1
-39.5842	0	1	1
55.1568	0	1	1
-2.93065	1	1	1
173.08	0	1	1
-29.2214	0	1	1
32.9874	0	1	1
1367.95	0	1	1
1954.49	0	1	1
2461.48	0	1	1
957.037	0	1	1
1012	1	1	1
2186.24	0	1	1
2563.57	0	1	1
1585.1	0	1	1
1169.25	0	1	1
1364.69	1	1	1
2578.69	0	1	1
1615.47	0	1	1
1740.26	1	1	1
1620.11	0	1	1
2285.25	0	1	1
2265.74	0	1	1
3858.67	0	1	1
3274.02	0	1	1
377.112	0	1	1
1415.1	0	1	1
3106.46	0	1	1
816.751	0	1	1
529.716	1	1	1
1032.93	0	1	1
1067.88	0	1	1
406.338	0	1	1
498.513	0	1	1
1726.45	0	1	1
1023.54	0	1	1
388.448	1	1	1
1672.09	1	1	1
1566.69	1	1	1
555.34	0	1	1
887.659	0	1	1
15282.6	0	1	1
799.412	0	1	1
457.188	1	1	1
2703.7	1	1	1
1644.93	1	1	1
848.711	1	1	1
159.062	1	1	1
422.696	0	1	1
224.98	1	1	1
387.528	0	1	1
95.3816	0	1	1
30.7976	1	1	1
319.774	0	1	1
546.786	1	1	1
564.664	0	1	1
982.382	1	1	1
918.382	0	1	1
236.167	0	1	1
333.392	0	1	1
516.453	0	1	1
900.018	1	1	1
623.605	0	1	1
-28.6977	0	1	1
-92.8538	0	1	1
-79.7059	0	1	1
-83.0802	0	1	1
-57.9405	0	1	1
-34.6345	0	1	1
-68.5743	0	1	1
-29.2348	0	1	1
-41.177	0	1	1
-6.74344	0	1	1
-56.4822	0	1	1
-70.2444	0	1	1
-56.845	0	1	1
-23.1216	0	1	1
-4.15193	0	1	1
-77.0122	0	1	1
-9.99721	0	1	1
85.3942	0	1	1
-56.2801	0	1	1
160.804	0	1	1
38.3211	0	1	1
14.7951	0	1	1
-5.89849	0	1	1
81.8079	0	1	1
90.9011	0	1	1
74.987	0	1	1
-58.9361	0	1	1
-15.0861	0	1	1
58.752	0	1	1
7.62713	0	1	1
-78.9506	0	1	1
2.11383	0	1	1
-34.3215	0	1	1
-19.6324	1	1	1
-45.9946	0	1	1
-79.1492	0	1	1
-33.3748	0	1	1
-36.8302	0	1	1
-62.0798	0	1	1
-29.5827	0	1	1
-70.5925	0	1	1
12.0977	0	1	1
-27.5689	0	1	1
-74.4469	0	1	1
-28.1249	0	1	1
-57.6775	0	1	1
-34.9633	1	1	1
-58.0822	0	1	1
33.3911	0	1	1
-50.5182	0	1	1
-55.5112	0	1	1
-53.2945	0	1	1
-63.7542	0	1	1
-32.3983	0	1	1
-55.2126	0	1	1
-53.7569	0	1	1
-35.0253	0	1	1
-16.6112	0	1	1
-78.8093	0	1	1
-58.9231	0	1	1
-12.3499	0	1	1
-55.7496	0	1	1
-68.6989	0	1	1
-48.2212	0	1	1
-68.3488	0	1	1
-57.5904	0	1	1
-41.6176	0	1	1
-51.8783	0	1	1
-83.1819	0	1	1
-63.227	0	1	1
-35.181	0	1	1
-38.5983	0	1	1
-64.1677	0	1	1
-27.3424	0	1	1
-63.3928	0	1	1
-59.0452	0	1	1
-34.6195	0	1	1
-60.965	0	1	1
-67.2686	0	1	1
-53.8967	0	1	1
-57.9224	0	1	1
1721.3	0	1	1
255.036	0	1	1
97.5186	0	1	1
149.772	0	1	1
208.014	0	1	1
-9.9457	0	1	1
189.903	0	1	1
286.879	0	1	1
240.069	1	1	1
205.883	0	1	1
188.263	0	1	1
473.599	0	1	1
147.012	0	1	1
431.765	0	1	1
210.208	0	1	1
-24.4284	0	1	1
-30.3247	0	1	1
-7.82585	0	1	1
171.216	0	1	1
-19.0702	1	1	1
3150.28	0	1	1
131.894	0	1	1
5.55302	0	1	1
202.784	0	1	1
181.527	0	1	1
323.632	0	1	1
103.699	0	1	1
131.733	0	1	1
62.9559	0	1	1
-99.9998	0	1	1
-99.9998	0	1	1
-99.9997	0	1	1
-99.9999	0	1	1
-99.9996	0	1	1
-99.9986	0	1	1
-99.9996	0	1	1
-99.9995	0	1	1
-99.9998	1	1	1
-99.9998	0	1	1
-99.9998	1	1	1
-99.9996	1	1	1
-30.5489	0	1	1
19.4556	0	1	1
-8.25021	0	1	1
-53.2996	1	1	1
-20.0413	0	1	1
14.1772	0	1	1
54.0652	0	1	1
139.08	0	1	1
28.2334	0	1	1
85.5534	0	1	1
76.0096	0	1	1
21.1799	0	1	1
104.121	1	1	1
6.53651	0	1	1
487.678	0	1	1
-12.2752	0	1	1
5.66821	0	1	1
16.9585	0	1	1
65.7371	0	1	1
79.051	0	1	1
-50.575	0	1	1
103.164	0	1	1
-39.2124	0	1	1
82.8614	0	1	1
-5.88641	0	1	1
62.4377	0	1	1
103.028	0	1	1
-38.195	0	1	1
116.459	0	1	1
1.15324	0	1	1
42.3291	1	1	1
27.3882	0	1	1
-19.6229	0	1	1
-27.7881	0	1	1
71.5374	1	1	1
17.4995	1	1	1
189.476	0	1	1
126.503	0	1	1
53.8431	0	1	1
27.8693	0	1	1
114.975	0	1	1
124.525	1	1	1
35.1813	0	1	1
27.337	0	1	1
23.774	0	1	1
165.87	0	1	1
4.91529	1	1	1
29.8896	0	1	1
-30.2476	0	1	1
34.4571	0	1	1
16.3056	0	1	1
15.65	0	1	1
56.3158	0	1	1
9.2203	0	1	1
-35.2868	0	1	1
-84.8959	0	1	1
27.1649	1	1	1
45.5787	0	1	1
-45.9751	0	1	1
-46.0853	0	1	1
10.5416	0	1	1
-67.348	0	1	1
0.0397886	0	1	1
-13.4615	0	1	1
-80.9553	0	1	1
-37.4261	0	1	1
-44.1163	0	1	1
21.9392	0	1	1
-4.15104	0	1	1
-6.1249	1	1	1
-80.7301	1	1	1
-18.1664	1	1	1
-73.9889	0	1	1
-12.7378	0	1	1
76.0515	0	1	1
-52.9108	0	1	1
-32.6212	0	1	1
-45.3009	0	1	1
-60.1112	0	1	1
-45.777	0	1	1
-41.4614	0	1	1
-40.9011	0	1	1
-46.4778	0	1	1
-51.0932	0	1	1
-40.3353	0	1	1
-82.135	0	1	1
-42.8927	1	1	1
-14.2653	0	1	1
-47.1035	0	1	1
-12.8408	0	1	1
99.9728	0	1	1
-59.7722	0	1	1
4.92072	0	1	1
-35.0575	0	1	1
596.639	0	1	1
-47.5469	0	1	1
-25.4366	0	1	1
564.32	0	1	1
368.411	0	1	1
-45.0566	0	1	1
-52.9022	0	1	1
-15.2887	0	1	1
-78.3924	0	1	1
44.2226	0	1	1
-26.0074	0	1	1
171.401	0	1	1
701.851	0	1	1
308.571	0	1	1
135.249	0	1	1
67.233	0	1	1
-15.5825	0	1	1
132.781	0	1	1
78.5447	0	1	1
528.177	0	1	1
-40.082	0	1	1
-22.316	0	1	1
574.928	0	1	1
-19.7882	0	1	1
194.901	0	1	1
13.7073	0	1	1
33.7388	0	1	1
522.26	0	1	1
462.901	0	1	1
270.462	0	1	1
27.1424	0	1	1
39.4214	0	1	1
242.534	0	1	1
366.264	0	1	1
1444.19	0	1	1
419.609	0	1	1
1219.8	0	1	1
237.106	0	1	1
1383.23	0	1	1
2325.58	1	1	1
4493.12	0	1	1
1012.18	0	1	1
785.076	0	1	1
161.154	0	1	1
1297.36	1	1	1
1320.25	0	1	1
696.905	0	1	1
1607.36	0	1	1
1235.63	0	1	1
1086.89	0	1	1
911.297	0	1	1
690.11	0	1	1
962.531	0	1	1
722.582	0	1	1
63.4045	1	1	1
-11.911	0	1	1
582.436	0	1	1
1611.35	1	1	1
1904.36	0	1	1
149.94	0	1	1
546.823	0	1	1
1974.84	0	1	1
1731.01	0	1	1
634.156	1	1	1
789.826	0	1	1
338.306	0	1	1
359.507	0	1	1
448.544	0	1	1
731.446	0	1	1
347.108	1	1	1
374.36	0	1	1
345.417	0	1	1
657.975	1	1	1
-64.1328	0	1	1
241.328	0	1	1
288.509	0	1	1
134.195	0	1	1
800.965	1	1	1
555.13	0	1	1
1014.37	0	1	1
502.191	0	1	1
311.976	0	1	1
38.6569	0	1	1
251.402	0	1	1
922.244	1	1	1
333.396	0	1	1
675.788	0	1	1
808.034	0	1	1
-44.5217	0	1	1
-35.1447	1	1	1
-78.6609	0	1	1
-81.6162	0	1	1
-20.3139	0	1	1
-48.6476	0	1	1
4.22672	0	1	1
-69.241	0	1	1
-66.3488	0	1	1
-59.0367	0	1	1
40.2824	0	1	1
4.08958	0	1	1
-21.3023	0	1	1
-64.7176	0	1	1
-16.3461	0	1	1
62.4325	0	1	1
8.00156	0	1	1
43.6111	0	1	1
-69.1836	0	1	1
-30.4944	0	1	1
-9.18162	0	1	1
-59.6149	0	1	1
-65.4966	0	1	1
-65.2899	0	1	1
258.729	0	1	1
-3.2377	0	1	1
-60.4885	0	1	1
-64.151	0	1	1
-48.633	0	1	1
109.261	0	1	1
-13.2605	0	1	1
72.2349	0	1	1
175.434	0	1	1
-85.8117	1	1	1
6.50788	0	1	1
155.661	1	1	1
245.711	1	1	1
-26.2749	1	1	1
195.489	1	1	1
161.967	1	1	1
73.8729	0	1	1
118.339	0	1	1
133.898	1	1	1
-66.4944	0	1	1
115.19	0	1	1
35.5209	0	1	1
71.5144	1	1	1
167.476	0	1	1
-10.092	1	1	1
49.8513	1	1	1
41.1227	1	1	1
-48.7799	0	1	1
28.4788	1	1	1
25.7315	1	1	1
10.1221	1	1	1
15.3653	1	1	1
10.9246	1	1	1
138.175	1	1	1
36.9809	1	1	1
-54.4928	0	1	1
-7.47855	0	1	1
-50.5205	0	1	1
-9.43551	1	1	1
59.7655	1	1	1
81.9955	1	1	1
29.076	0	1	1
113.633	1	1	1
-9.82176	0	1	1
402.01	0	1	1
309.171	0	1	1
-34.4738	0	1	1
235.269	1	1	1
94.1382	0	1	1
290.128	1	1	1
397.057	0	1	1
190.484	0	1	1
1165.15	1	1	1
205.875	0	1	1
184.119	1	1	1
139.694	1	1	1
93.2986	1	1	1
-25.3987	0	1	1
104.108	1	1	1
336.248	1	1	1
96.6196	1	1	1
56.2284	1	1	1
114.376	1	1	1
69.8875	1	1	1
82.349	1	1	1
103.714	1	1	1
-64.7299	0	1	1
224.578	0	1	1
181.982	0	1	1
31.5175	1	1	1
156.627	0	1	1
172.631	0	1	1
100.273	0	1	1
82.9592	1	1	1
373.905	0	1	1
-11.0712	0	1	1
6.83705	1	1	1
-87.7944	0	1	1
-70.0658	0	1	1
-66.028	0	1	1
-93.6762	0	1	1
-73.45	0	1	1
-81.0795	0	1	1
-67.429	0	1	1
-89.9241	0	1	1
-75.6569	0	1	1
-67.9174	0	1	1
-62.7947	1	1	1
-51.3125	0	1	1
-66.4041	0	1	1
-29.3808	0	1	1
9.67698	0	1	1
-64.6638	0	1	1
-58.2005	1	1	1
-95.3945	0	1	1
-54.3656	0	1	1
-59.5539	0	1	1
-27.4751	1	1	1
-95.5182	0	1	1
13.3683	0	1	1
-68.2237	0	1	1
-77.7466	0	1	1
-96.3067	0	1	1
-95.2248	0	1	1
-63.4288	0	1	1
-65.0839	0	1	1
-25.9662	0	1	1
-24.4267	0	1	1
-54.603	0	1	1
-17.8453	0	1	1
7.59885	0	1	1
-47.0219	0	1	1
-27.121	0	1	1
33.6329	0	1	1
74.9604	0	1	1
-38.8748	0	1	1
-14.1606	0	1	1
-5.05491	0	1	1
-28.4203	0	1	1
-29.3449	0	1	1
3.61264	0	1	1
107.42	0	1	1
-24.1064	0	1	1
827.855	0	1	1
1263.12	0	1	1
1229.13	0	1	1
718.71	0	1	1
247.329	0	1	1
491.495	0	1	1
717.974	1	1	1
299.9	0	1	1
-70.297	0	1	1
11.0377	0	1	1
-61.4973	0	1	1
-44.6095	0	1	1
-65.2061	0	1	1
283.131	0	1	1
-50.8535	0	1	1
-47.3773	0	1	1
-36.1991	0	1	1
-30.9115	0	1	1
302.162	0	1	1
-42.5546	0	1	1
-56.6613	0	1	1
-52.3889	0	1	1
74.6166	0	1	1
-76.3556	0	1	1
448.666	0	1	1
-78.6737	0	1	1
252.609	0	1	1
-66.0758	0	1	1
-49.2544	0	1	1
18.9474	0	1	1
128.838	0	1	1
-34.6882	0	1	1
-61.1174	0	1	1
-2.25527	0	1	1
9.3654	0	1	1
40.9433	0	1	1
87.7268	0	1	1
1.47779	0	1	1
74.7689	0	1	1
35.8561	0	1	1
-31.6525	0	1	1
97.1859	0	1	1
-73.5358	0	1	1
89.6595	0	1	1
-27.8173	0	1	1
37.8783	0	1	1
-41.7554	0	1	1
20.0189	0	1	1
-24.4202	0	1	1
1.68546	0	1	1
114.313	0	1	1
233.643	0	1	1
13.9789	0	1	1
-28.4567	0	1	1
66.898	0	1	1
-46.803	0	1	1
1.31637	1	1	1
-1.68426	0	1	1
37.848	0	1	1
251.923	0	1	1
47.0219	0	1	1
91.874	0	1	1
182.777	0	1	1
70.0382	0	1	1
80.9886	0	1	1
-24.9776	0	1	1
-49.2967	0	1	1
38.4887	0	1	1
27.078	0	1	1
61.8838	0	1	1
153.401	1	1	1
32.7075	0	1	1
24.7154	0	1	1
20.8619	0	1	1
-13.7754	0	1	1
127.61	0	1	1
-8.96996	0	1	1
-11.2254	0	1	1
-71.5048	0	1	1
-70.6098	0	1	1
-77.4535	0	1	1
-63.2488	0	1	1
-80.7171	0	1	1
-66.9037	0	1	1
-82.5991	0	1	1
-63.2918	0	1	1
-60.3914	0	1	1
-87.503	0	1	1
-71.0504	1	1	1
-87.6322	0	1	1
-71.9433	1	1	1
-84.8422	0	1	1
-59.0811	0	1	1
-57.8623	1	1	1
-38.8158	0	1	1
-63.5639	0	1	1
-82.0904	0	1	1
-66.4614	0	1	1
-62.9329	0	1	1
-73.6513	0	1	1
-93.7664	0	1	1
-87.4199	0	1	1
-79.1789	0	1	1
-59.6313	0	1	1
-69.3871	0	1	1
-64.8556	0	1	1
-64.3953	0	1	1
-71.3307	0	1	1
-73.9333	0	1	1
-74.2152	1	1	1
-77.2883	0	1	1
-68.6884	1	1	1
-81.9936	1	1	1
-80.4022	0	1	1
-68.3272	0	1	1
-70.9903	0	1	1
-63.4301	0	1	1
-84.8787	0	1	1
-59.4425	0	1	1
-75.5765	0	1	1
-61.9434	0	1	1
-75.0576	0	1	1
-77.1544	0	1	1
-36.0274	0	1	1
-85.1617	0	1	1
-63.8097	1	1	1
-76.2031	0	1	1
-68.5286	0	1	1
157.489	0	1	1
27.9667	0	1	1
8.85497	0	1	1
240.851	0	1	1
99.5528	0	1	1
148.226	0	1	1
147.42	0	1	1
434.601	0	1	1
142.761	0	1	1
474.409	0	1	1
249.299	0	1	1
136.568	0	1	1
34.6803	0	1	1
260.812	0	1	1
258.833	0	1	1
2541.93	0	1	1
590.54	0	1	1
1967.74	0	1	1
582.271	0	1	1
231.494	0	1	1
861.087	0	1	1
717.37	0	1	1
275.827	0	1	1
34.2278	0	1	1
668.783	0	1	1
438.111	0	1	1
591.756	0	1	1
129.848	0	1	1
50.8458	0	1	1
325.711	0	1	1
102.024	1	1	1
865.789	0	1	1
-7.29051	1	1	1
1417.19	0	1	1
557.163	0	1	1
901.756	0	1	1
735.145	0	1	1
772.533	0	1	1
212.281	0	1	1
187.269	0	1	1
550.653	0	1	1
1881.18	0	1	1
1015.09	1	1	1
473.144	0	1	1
831.132	1	1	1
288.803	1	1	1
817.288	0	1	1
805.895	0	1	1
484.334	0	1	1
681.39	0	1	1
247.657	1	1	1
384.17	0	1	1
713.041	0	1	1
15.351	1	1	1
-45.2524	1	1	1
70.6146	0	1	1
671.5	0	1	1
136.211	0	1	1
239.507	1	1	1
1117.94	0	1	1
212.418	0	1	1
-8.04568	1	1	1
150.266	1	1	1
332.227	1	1	1
112.644	0	1	1
-86.0833	0	1	2
-59.9986	1	1	2
-80.2384	1	1	2
-90.1263	1	1	2
-79.8778	0	1	2
-69.6256	0	1	2
-50.0541	0	1	2
-61.1162	1	1	2
-46.5448	0	1	2
-77.36	1	1	2
-83.745	0	1	2
-75.7897	0	1	2
-85.887	0	1	2
-93.24	0	1	2
554.008	1	1	2
1290.11	1	1	2
1043.75	1	1	2
1290.31	0	1	2
1073.78	0	1	2
1299.19	0	1	2
694.833	0	1	2
1442.92	0	1	2
412.029	1	1	2
492.786	1	1	2
557.529	0	1	2
549.212	0	1	2
542.935	0	1	2
715.147	0	1	2
287.54	0	1	2
768.702	1	1	2
536.975	0	1	2
464.772	0	1	2
221.737	0	1	2
250.568	0	1	2
381.405	0	1	2
748.532	1	1	2
285.116	0	1	2
535.042	0	1	2
796.837	0	1	2
313.049	1	1	2
1097.53	0	1	2
952.401	0	1	2
106.115	0	1	2
732.665	0	1	2
54.1972	0	1	2
149.304	1	1	2
760.391	0	1	2
935.125	0	1	2
940.677	0	1	2
230.795	0	1	2
265.079	1	1	2
-13.2571	0	1	2
-14.5786	0	1	2
-54.3485	0	1	2
-78.0353	0	1	2
93.9599	0	1	2
-81.0989	0	1	2
-72.2782	0	1	2
-70.3605	1	1	2
-47.9477	0	1	2
233.926	0	1	2
-32.1869	0	1	2
21.6082	0	1	2
334.09	0	1	2
78.847	0	1	2
1.12353	0	1	2
236.366	0	1	2
84.3073	0	1	2
238.455	0	1	2
421.122	0	1	2
285.566	0	1	2
67.8672	0	1	2
-28.2913	0	1	2
182.704	0	1	2
-50.2665	0	1	2
-48.9732	0	1	2
-55.8815	0	1	2
10.9239	0	1	2
-52.4861	0	1	2
-40.0254	0	1	2
-64.8066	0	1	2
-44.4478	0	1	2
-60.5206	0	1	2
-38.663	0	1	2
-85.8353	0	1	2
-85.8838	0	1	2
-54.5739	0	1	2
-84.9612	0	1	2
1202.6	0	1	2
3971.65	0	1	2
620.211	0	1	2
759.849	0	1	2
1688.43	0	1	2
977.68	0	1	2
1103.14	0	1	2
746.741	0	1	2
18751	0	1	2
14640.4	0	1	2
358.112	0	1	2
1625.31	0	1	2
11125	0	1	2
3920.95	0	1	2
1016.91	0	1	2
283.149	0	1	2
233.965	0	1	2
170.247	0	1	2
197.721	1	1	2
896.083	0	1	2
369.721	0	1	2
1752.69	0	1	2
293.575	1	1	2
783.626	0	1	2
3033.35	0	1	2
203.491	0	1	2
562.678	0	1	2
1349.58	0	1	2
261.528	0	1	2
666.121	1	1	2
641.081	0	1	2
2295.39	1	1	2
795.95	0	1	2
759.796	1	1	2
1219.35	0	1	2
329.874	0	1	2
771.249	0	1	2
1036.35	0	1	2
598.181	1	1	2
1057.81	0	1	2
809.865	0	1	2
708.441	1	1	2
439.063	1	1	2
638.715	0	1	2
891.467	0	1	2
162.498	0	1	2
297.924	0	1	2
179.122	0	1	2
266.093	0	1	2
275.733	0	1	2
144.424	0	1	2
513.535	0	1	2
126.032	0	1	2
193.281	1	1	2
487.624	0	1	2
428.559	1	1	2
168.688	0	1	2
362.07	0	1	2
68.4548	0	1	2
309.479	0	1	2
335.887	0	1	2
214.591	1	1	2
382.501	0	1	2
4.80351	0	1	2
134.819	0	1	2
1187.77	0	1	2
693.392	0	1	2
814.923	0	1	2
37.0188	0	1	2
-13.1086	0	1	2
-19.3958	0	1	2
72.7648	0	1	2
1899.76	0	1	2
341.25	0	1	2
-18.8741	0	1	2
423.178	0	1	2
-0.775257	0	1	2
95.5551	0	1	2
-13.121	0	1	2
84.4763	0	1	2
22.1067	1	1	2
281.286	0	1	2
-8.01853	0	1	2
92.2464	0	1	2
1475.95	0	1	2
2057.29	0	1	2
2531.75	0	1	2
949.868	0	1	2
786.139	1	1	2
1493.98	0	1	2
1914.74	0	1	2
1767.77	0	1	2
1235.52	0	1	2
1459.1	1	1	2
1590.52	0	1	2
1689.26	0	1	2
1837.73	1	1	2
1452.63	0	1	2
2331.15	0	1	2
2252.02	0	1	2
2640.63	0	1	2
2102.4	0	1	2
347.3	0	1	2
1508.74	0	1	2
3277.56	0	1	2
1210.32	0	1	2
863.116	1	1	2
1518	0	1	2
1707.21	0	1	2
686.133	0	1	2
813.85	0	1	2
2745.97	0	1	2
951.953	0	1	2
373.224	1	1	2
1578.47	1	1	2
1528.24	1	1	2
504.125	0	1	2
754.427	0	1	2
5031.05	0	1	2
737.425	0	1	2
400.427	1	1	2
2861.88	1	1	2
1633.74	1	1	2
1264.52	1	1	2
133.265	1	1	2
511.962	0	1	2
221.593	1	1	2
325.459	0	1	2
60.557	0	1	2
17.3823	1	1	2
276.966	0	1	2
477.647	1	1	2
478.776	0	1	2
1015.75	1	1	2
364.602	0	1	2
166.194	0	1	2
287.188	0	1	2
415.446	0	1	2
791.017	1	1	2
455.835	0	1	2
15.8481	0	1	2
-87.727	0	1	2
-65.9124	0	1	2
-67.93	0	1	2
-28.1368	0	1	2
15.3111	0	1	2
-45.5044	0	1	2
39.4904	0	1	2
15.7938	0	1	2
98.0863	0	1	2
-10.6218	0	1	2
-39.8562	0	1	2
-12.7715	0	1	2
24.3772	0	1	2
59.213	0	1	2
-60.2389	0	1	2
52.849	0	1	2
223.775	0	1	2
-20.7126	0	1	2
365.266	0	1	2
109.714	0	1	2
78.1326	0	1	2
52.2955	0	1	2
184.899	0	1	2
199.024	0	1	2
178.982	0	1	2
-38.7596	0	1	2
28.2278	0	1	2
121.505	0	1	2
71.34	0	1	2
-72.7032	0	1	2
35.5344	0	1	2
-26.1591	0	1	2
12.9723	1	1	2
-31.1074	0	1	2
-70.1988	0	1	2
83.1188	0	1	2
36.9713	0	1	2
-21.569	0	1	2
41.5168	0	1	2
-46.7007	0	1	2
121.384	0	1	2
41.8684	0	1	2
-49.9281	0	1	2
40.6154	0	1	2
-15.1161	0	1	2
27.887	1	1	2
-17.2437	0	1	2
182.077	0	1	2
2.3005	0	1	2
-5.65054	0	1	2
-2.61682	0	1	2
-22.7219	0	1	2
51.2948	0	1	2
-3.69402	0	1	2
-7.78414	0	1	2
33.732	0	1	2
70.8	0	1	2
-58.0469	0	1	2
-8.03204	0	1	2
74.338	0	1	2
-12.7638	0	1	2
-36.3715	0	1	2
6.59613	0	1	2
-30.8528	0	1	2
-18.3256	0	1	2
23.2284	0	1	2
7.98308	0	1	2
-65.2579	0	1	2
-10.2774	0	1	2
64.9558	0	1	2
20.389	0	1	2
-12.3756	0	1	2
94.2012	0	1	2
-32.2486	0	1	2
-14.6265	0	1	2
-8.38235	0	1	2
-9.26649	0	1	2
-35.9435	0	1	2
-6.59332	0	1	2
-13.414	0	1	2
2116.68	0	1	2
295.82	0	1	2
129.055	0	1	2
185.667	0	1	2
262.379	0	1	2
4.333	0	1	2
232.653	0	1	2
366.733	0	1	2
300.733	1	1	2
276.588	0	1	2
230.437	0	1	2
554.262	0	1	2
185.272	0	1	2
527.86	0	1	2
291.837	0	1	2
4.75064	0	1	2
-15.0565	0	1	2
29.7424	0	1	2
317.633	0	1	2
28.7827	1	1	2
208.706	0	1	2
228.439	0	1	2
51.9209	0	1	2
282.965	0	1	2
296.566	0	1	2
501.592	0	1	2
203.536	0	1	2
216.239	0	1	2
219.236	0	1	2
369.019	0	1	2
63.6177	0	1	2
871.962	0	1	2
1669.49	0	1	2
734.433	0	1	2
482.391	0	1	2
1253.28	0	1	2
-45.2664	0	1	2
589.214	1	1	2
748.115	0	1	2
988.922	1	1	2
-55.8988	1	1	2
0.12985	0	1	2
37.8679	0	1	2
3.97352	0	1	2
-37.3565	1	1	2
-3.47831	0	1	2
54.0496	0	1	2
80.9087	0	1	2
177.892	0	1	2
47.7243	0	1	2
106.369	0	1	2
109.176	0	1	2
39.2089	0	1	2
140.876	1	1	2
22.6823	0	1	2
521.295	0	1	2
-1.79737	0	1	2
28.4098	0	1	2
41.9685	0	1	2
103.353	0	1	2
116.097	0	1	2
-25.9691	0	1	2
152.506	0	1	2
-17.3497	0	1	2
120.802	0	1	2
-1.54361	0	1	2
112.184	0	1	2
139.804	0	1	2
-25.6661	0	1	2
143.441	0	1	2
28.6154	0	1	2
46.2463	1	1	2
-40.8239	0	1	2
-8.89768	0	1	2
-21.2839	0	1	2
112.159	1	1	2
29.5883	1	1	2
203.665	0	1	2
102.973	0	1	2
111.829	0	1	2
17.5191	0	1	2
146.624	0	1	2
100.295	1	1	2
57.1089	0	1	2
37.9006	0	1	2
42.7973	0	1	2
241.213	0	1	2
-12.118	1	1	2
37.4462	0	1	2
3.77831	0	1	2
49.9627	0	1	2
-30.8057	0	1	2
14.4865	0	1	2
94.4916	0	1	2
18.5698	0	1	2
-37.2406	0	1	2
-76.8604	0	1	2
13.5361	1	1	2
11.4885	0	1	2
-35.8959	0	1	2
-28.0151	0	1	2
-9.74963	0	1	2
-61.5967	0	1	2
12.8379	0	1	2
16.9376	0	1	2
-73.4354	0	1	2
-39.4264	0	1	2
-39.4972	0	1	2
20.3081	0	1	2
44.3066	0	1	2
-16.6273	1	1	2
-77.0275	1	1	2
-29.5257	1	1	2
-58.2268	0	1	2
12.1731	0	1	2
132.166	0	1	2
-55.864	0	1	2
-36.0308	0	1	2
-41.8944	0	1	2
-38.3235	0	1	2
-37.0783	0	1	2
-24.2245	0	1	2
-20.2592	0	1	2
125.246	0	1	2
-52.6088	0	1	2
-30.4381	0	1	2
-74.2767	0	1	2
-18.5325	1	1	2
4.38949	0	1	2
-29.5597	0	1	2
38.6137	0	1	2
184.998	0	1	2
-58.7657	0	1	2
2.08631	0	1	2
-44.8788	0	1	2
72.384	0	1	2
-47.9257	0	1	2
-18.4548	0	1	2
-60.911	0	1	2
-59.0388	0	1	2
-15.5257	0	1	2
-32.1631	0	1	2
28.3795	0	1	2
-77.2591	0	1	2
-18.104	0	1	2
-23.0992	0	1	2
291.235	0	1	2
1062.16	0	1	2
485.218	0	1	2
233.054	0	1	2
131.139	0	1	2
13.9108	0	1	2
228.682	0	1	2
151.217	0	1	2
777.054	0	1	2
-18.539	0	1	2
3.10786	0	1	2
843.984	0	1	2
7.62099	0	1	2
316.896	0	1	2
73.6075	0	1	2
80.5081	0	1	2
690.147	0	1	2
619.365	0	1	2
374.127	0	1	2
60.1682	0	1	2
86.423	0	1	2
356.81	0	1	2
468.885	0	1	2
1861.51	0	1	2
551.912	0	1	2
1646.34	0	1	2
316.255	0	1	2
1129.43	0	1	2
1985.09	1	1	2
1100.82	0	1	2
814.98	0	1	2
608.478	0	1	2
116.335	0	1	2
1044.16	1	1	2
1060.58	0	1	2
551.297	0	1	2
1348.47	0	1	2
1011.25	0	1	2
882.143	0	1	2
728.943	0	1	2
542.064	0	1	2
677.86	0	1	2
562.332	0	1	2
17.5255	1	1	2
-38.8707	0	1	2
491.316	0	1	2
1276.03	1	1	2
1487.62	0	1	2
84.1986	0	1	2
405.916	0	1	2
1451.19	0	1	2
1386.2	0	1	2
619.006	1	1	2
769.493	0	1	2
395.596	0	1	2
326.39	0	1	2
413.674	0	1	2
709.304	0	1	2
330.205	1	1	2
353.625	0	1	2
316.198	0	1	2
651.298	1	1	2
-65.7789	0	1	2
221.866	0	1	2
279.752	0	1	2
109.225	0	1	2
717.463	1	1	2
502.909	0	1	2
922.359	0	1	2
454.678	0	1	2
279.999	0	1	2
24.3195	0	1	2
227.818	0	1	2
848.943	1	1	2
309.132	0	1	2
606.894	0	1	2
745.392	0	1	2
-11.6299	0	1	2
2.59533	1	1	2
-64.4566	0	1	2
-72.2379	0	1	2
29.0482	0	1	2
-16.1268	0	1	2
66.1361	0	1	2
-48.9958	0	1	2
-40.9985	0	1	2
-52.1838	0	1	2
55.741	0	1	2
11.5216	0	1	2
-11.8264	0	1	2
-60.1324	0	1	2
-2.09802	0	1	2
87.346	0	1	2
22.6671	0	1	2
71.0678	0	1	2
-64.8149	0	1	2
-18.9731	0	1	2
4.69986	0	1	2
-53.1474	0	1	2
-59.7141	0	1	2
-58.4468	0	1	2
314.679	0	1	2
9.62425	0	1	2
-54.763	0	1	2
-60.5436	0	1	2
-43.5069	0	1	2
131.234	0	1	2
-2.86288	0	1	2
74.8826	0	1	2
134.491	0	1	2
-92.5314	1	1	2
9.31613	0	1	2
152.635	1	1	2
234.937	1	1	2
-28.6633	1	1	2
195.824	1	1	2
134.126	1	1	2
5.7866	0	1	2
106.347	0	1	2
139.809	1	1	2
-69.882	0	1	2
105.418	0	1	2
35.2731	0	1	2
60.878	1	1	2
145.15	0	1	2
-23.7805	1	1	2
17.2028	1	1	2
22.1516	1	1	2
-59.5646	0	1	2
13.9941	1	1	2
9.74733	1	1	2
-8.00402	1	1	2
4.91851	1	1	2
-2.14489	1	1	2
-7.29632	1	1	2
26.1704	1	1	2
-38.3156	0	1	2
-17.25	0	1	2
-55.6303	0	1	2
-16.4837	1	1	2
50.1219	1	1	2
65.6617	1	1	2
-9.833	0	1	2
96.3677	1	1	2
79.8079	0	1	2
896.431	0	1	2
714.179	0	1	2
30.1242	0	1	2
627.797	1	1	2
260.303	0	1	2
565.728	1	1	2
1119.61	0	1	2
460.032	0	1	2
2538.67	1	1	2
508.353	0	1	2
879.844	1	1	2
592.201	1	1	2
525.891	1	1	2
144.483	0	1	2
490.93	1	1	2
1182.95	1	1	2
454.424	1	1	2
375.284	1	1	2
655.065	1	1	2
475.093	1	1	2
621.688	1	1	2
287.393	1	1	2
122.478	0	1	2
847.04	0	1	2
649.858	0	1	2
314.941	1	1	2
698.467	0	1	2
840.225	0	1	2
552.255	0	1	2
470.142	1	1	2
808.289	0	1	2
1.10575	0	1	2
20.5959	1	1	2
-80.7115	0	1	2
-65.7466	0	1	2
-58.6822	0	1	2
-92.1929	0	1	2
-64.1946	0	1	2
-74.7757	0	1	2
-57.043	0	1	2
-86.6139	0	1	2
-69.1385	0	1	2
-58.3663	0	1	2
-52.0181	1	1	2
-35.3048	0	1	2
-54.6615	0	1	2
2.74308	0	1	2
47.9806	0	1	2
-51.7792	0	1	2
-38.6627	1	1	2
-95.6571	0	1	2
-41.4888	0	1	2
-49.1857	0	1	2
-18.164	1	1	2
-95.0446	0	1	2
30.7596	0	1	2
-64.4684	0	1	2
-73.6825	0	1	2
-95.3313	0	1	2
-93.9223	0	1	2
-57.5953	0	1	2
-58.349	0	1	2
-14.9864	0	1	2
-13.8421	0	1	2
-47.3466	0	1	2
-6.26958	0	1	2
23.0226	0	1	2
-43.4882	0	1	2
-15.7115	0	1	2
42.007	0	1	2
93.2433	0	1	2
-37.5246	0	1	2
-7.37589	0	1	2
6.84527	0	1	2
-22.8477	0	1	2
-23.6886	0	1	2
10.381	0	1	2
127.236	0	1	2
-18.5547	0	1	2
533.633	0	1	2
845.967	0	1	2
801.352	0	1	2
497.636	0	1	2
141.798	0	1	2
328.564	0	1	2
490.719	1	1	2
193.493	0	1	2
-64.6468	0	1	2
107.762	0	1	2
-26.5856	0	1	2
8.11321	0	1	2
-37.8129	0	1	2
637.858	0	1	2
-13.8126	0	1	2
4.49291	0	1	2
24.1298	0	1	2
33.3635	0	1	2
645.672	0	1	2
5.56036	0	1	2
-22.1288	0	1	2
-19.8348	0	1	2
229.417	0	1	2
-57.6941	0	1	2
909.028	0	1	2
-67.6956	0	1	2
567.195	0	1	2
-45.6137	0	1	2
-4.79683	0	1	2
121.122	0	1	2
323.349	0	1	2
12.6046	0	1	2
-22.9834	0	1	2
99.108	0	1	2
94.9269	0	1	2
166.63	0	1	2
250.469	0	1	2
70.6131	0	1	2
212.062	0	1	2
172.299	0	1	2
29.263	0	1	2
281.893	0	1	2
-54.28	0	1	2
253.392	0	1	2
24.0492	0	1	2
153.1	0	1	2
-7.35061	0	1	2
112.894	0	1	2
29.8956	0	1	2
77.9595	0	1	2
309.246	0	1	2
517.979	0	1	2
107.878	0	1	2
37.1379	0	1	2
216.79	0	1	2
8.48289	0	1	2
78.9295	1	1	2
82.8861	0	1	2
141.39	0	1	2
559.078	0	1	2
170.62	0	1	2
249.089	0	1	2
438.345	0	1	2
193.825	0	1	2
230.451	0	1	2
36.9513	0	1	2
-15.4705	0	1	2
157.031	0	1	2
126.993	0	1	2
198.076	0	1	2
363.481	1	1	2
161.19	0	1	2
130.044	0	1	2
132.829	0	1	2
56.4091	0	1	2
335.4	0	1	2
66.1599	0	1	2
67.659	0	1	2
-57.1322	0	1	2
-56.9682	0	1	2
-51.2531	0	1	2
-16.2155	0	1	2
-56.1665	0	1	2
-10.5447	0	1	2
-50.5265	0	1	2
-11.6327	0	1	2
-25.1746	0	1	2
-78.8207	0	1	2
-47.6044	1	1	2
-75.1186	0	1	2
-32.7987	1	1	2
-62.1863	0	1	2
-10.611	0	1	2
-0.459305	1	1	2
48.1748	0	1	2
-14.1762	0	1	2
-51.5753	0	1	2
-13.277	0	1	2
-18.9818	0	1	2
-38.4429	0	1	2
-79.6455	0	1	2
-72.1501	0	1	2
-45.8627	0	1	2
-34.0264	0	1	2
-21.958	0	1	2
-15.6099	0	1	2
-34.5424	0	1	2
-28.0662	0	1	2
-41.6997	0	1	2
-30.518	1	1	2
10.5063	0	1	2
-40.062	1	1	2
-39.0757	1	1	2
-47.8949	0	1	2
-32.3865	0	1	2
-37.5297	0	1	2
19.2211	0	1	2
-74.7131	0	1	2
-11.8279	0	1	2
12.0059	0	1	2
-14.161	0	1	2
-49.2276	0	1	2
-14.8371	0	1	2
59.2984	0	1	2
-74.1912	0	1	2
-18.8956	1	1	2
-63.8879	0	1	2
-1.29823	0	1	2
222.751	0	1	2
85.9252	0	1	2
41.5887	0	1	2
586.77	0	1	2
137.635	0	1	2
186.242	0	1	2
188.128	0	1	2
505.976	0	1	2
166.116	0	1	2
560.393	0	1	2
275.312	0	1	2
185.199	0	1	2
52.5152	0	1	2
311.114	0	1	2
308.527	0	1	2
2861.16	0	1	2
709.956	0	1	2
2184.24	0	1	2
650.656	0	1	2
292.843	0	1	2
908.565	0	1	2
799.937	0	1	2
301.234	0	1	2
24.9095	0	1	2
690.442	0	1	2
458.211	0	1	2
628.693	0	1	2
129.032	0	1	2
-10.4604	0	1	2
326.473	0	1	2
146.076	1	1	2
936.481	0	1	2
-21.7449	1	1	2
1542.89	0	1	2
654.366	0	1	2
979.695	0	1	2
802.931	0	1	2
829.475	0	1	2
216.604	0	1	2
230.624	0	1	2
660.764	0	1	2
1983.42	0	1	2
1039.43	1	1	2
535.7	0	1	2
904.303	1	1	2
268.844	1	1	2
927.553	0	1	2
897.089	0	1	2
427.394	0	1	2
745.03	0	1	2
278.609	1	1	2
420.054	0	1	2
770.234	0	1	2
42.3772	1	1	2
-48.8982	1	1	2
76.0676	0	1	2
668.648	0	1	2
126.353	0	1	2
266.021	1	1	2
1211.7	0	1	2
232.275	0	1	2
-17.2006	1	1	2
179.707	1	1	2
384.496	1	1	2
128.697	0	1	2
-1.39343	0	1	3
-68.1797	1	1	3
-64.0544	1	1	3
-89.5842	1	1	3
-43.1542	0	1	3
-50.5654	0	1	3
1.34418	0	1	3
-62.6602	1	1	3
-51.9205	0	1	3
-49.7975	1	1	3
-21.869	0	1	3
-82.7991	0	1	3
-82.2029	0	1	3
-47.8376	0	1	3
210.422	1	1	3
604.887	1	1	3
519.69	1	1	3
642.933	0	1	3
449.71	0	1	3
594.831	0	1	3
251.919	0	1	3
659.848	0	1	3
214.702	1	1	3
275.311	1	1	3
306.603	0	1	3
294.659	0	1	3
246.172	0	1	3
430.62	0	1	3
110.977	0	1	3
505.319	1	1	3
331.645	0	1	3
279.342	0	1	3
111.972	0	1	3
133.645	0	1	3
223.595	0	1	3
492.122	1	1	3
161.303	0	1	3
304.057	0	1	3
520.556	0	1	3
182.945	1	1	3
720.57	0	1	3
607.486	0	1	3
45.9799	0	1	3
451.677	0	1	3
7.65566	0	1	3
-21.4707	1	1	3
-99.9969	0	1	3
-99.9967	0	1	3
-99.977	0	1	3
-99.9895	0	1	3
-99.9964	1	1	3
-44.4	0	1	3
-6.99941	0	1	3
68.5251	0	1	3
-89.2764	0	1	3
49.2963	0	1	3
-89.1825	0	1	3
-51.5828	0	1	3
-63.7713	1	1	3
-62.0017	0	1	3
153.038	0	1	3
-49.6063	0	1	3
-11.301	0	1	3
210.525	0	1	3
85.2172	0	1	3
-20.6719	0	1	3
96.893	0	1	3
21.8127	0	1	3
132.327	0	1	3
228.161	0	1	3
125.953	0	1	3
-25.5199	0	1	3
48.8857	0	1	3
-47.7673	0	1	3
-41.3641	0	1	3
0.70734	0	1	3
-73.165	0	1	3
64.877	0	1	3
-20.2997	0	1	3
-5.34928	0	1	3
-35.5944	0	1	3
-29.6605	0	1	3
-36.2715	0	1	3
23.2981	0	1	3
-71.6195	0	1	3
-75.7141	0	1	3
-25.6011	0	1	3
-80.6181	0	1	3
1458.81	0	1	3
1500.98	0	1	3
795.448	0	1	3
881.263	0	1	3
2081.43	0	1	3
984.965	0	1	3
1267.05	0	1	3
942.624	0	1	3
2290.72	0	1	3
1659.89	0	1	3
488.732	0	1	3
1246.62	0	1	3
3567.33	0	1	3
1439.48	0	1	3
1203.92	0	1	3
1094.04	0	1	3
865.165	0	1	3
560.854	0	1	3
673.347	1	1	3
476.054	0	1	3
1010.85	0	1	3
2199.89	0	1	3
1081.77	1	1	3
2259.48	0	1	3
4322.89	0	1	3
824.102	0	1	3
1277.83	0	1	3
2299.95	0	1	3
1050.33	0	1	3
809.031	1	1	3
768.041	0	1	3
2727.42	1	1	3
927.574	0	1	3
892.261	1	1	3
1435.59	0	1	3
389.946	0	1	3
900.649	0	1	3
1208.66	0	1	3
725.156	1	1	3
1276.82	0	1	3
956.512	0	1	3
822.57	1	1	3
517.817	1	1	3
753.981	0	1	3
1006.89	0	1	3
193.04	0	1	3
392.804	0	1	3
227.588	0	1	3
325.15	0	1	3
345.275	0	1	3
184.347	0	1	3
631.377	0	1	3
170.441	0	1	3
244.228	1	1	3
604.058	0	1	3
535.569	1	1	3
221.027	0	1	3
450.116	0	1	3
101.522	0	1	3
383.112	0	1	3
401.993	0	1	3
270.859	1	1	3
447.864	0	1	3
-26.1533	0	1	3
77.2797	0	1	3
900.155	0	1	3
513.762	0	1	3
623.323	0	1	3
1.08417	0	1	3
-34.7576	0	1	3
-41.3436	0	1	3
44.5975	0	1	3
1601.03	0	1	3
256.021	0	1	3
-29.8858	0	1	3
334.874	0	1	3
52.2	0	1	3
223.574	0	1	3
47.6072	0	1	3
216.976	0	1	3
94.7254	1	1	3
530.159	0	1	3
50.5531	0	1	3
240.103	0	1	3
1491.31	0	1	3
2081.64	0	1	3
2712.17	0	1	3
1013.2	0	1	3
708.827	1	1	3
1510.61	0	1	3
2095.53	0	1	3
1830.61	0	1	3
1235	0	1	3
1446.5	1	1	3
1642.05	0	1	3
1769.34	0	1	3
1819.78	1	1	3
1577.66	0	1	3
2542.67	0	1	3
2357.98	0	1	3
2767.72	0	1	3
2187.48	0	1	3
349.433	0	1	3
1574.84	0	1	3
3453.04	0	1	3
1483.05	0	1	3
1072.93	1	1	3
1876.46	0	1	3
2115.29	0	1	3
904.355	0	1	3
1025.17	0	1	3
3564.8	0	1	3
983.53	0	1	3
331.472	1	1	3
1624.06	1	1	3
1248.75	1	1	3
529.205	0	1	3
795.209	0	1	3
477.145	0	1	3
549.855	0	1	3
458.776	1	1	3
1591.2	1	1	3
877.369	1	1	3
789.484	1	1	3
267.524	1	1	3
590.028	0	1	3
380.45	1	1	3
657.895	0	1	3
309.988	0	1	3
89.651	1	1	3
456.706	0	1	3
856.191	1	1	3
806.122	0	1	3
676.332	1	1	3
621.262	0	1	3
276.197	0	1	3
465.749	0	1	3
835.052	0	1	3
1075.86	1	1	3
803.756	0	1	3
191.019	0	1	3
-70.6416	0	1	3
-12.9365	0	1	3
-20.033	0	1	3
90.1664	0	1	3
201.886	0	1	3
49.0105	0	1	3
134.703	0	1	3
104.622	0	1	3
217.633	0	1	3
48.9066	0	1	3
-1.20286	0	1	3
51.0578	0	1	3
121.224	0	1	3
188.262	0	1	3
-38.3828	0	1	3
176.514	0	1	3
467.739	0	1	3
22.8679	0	1	3
682.033	0	1	3
236.742	0	1	3
190.342	0	1	3
150.145	0	1	3
366.93	0	1	3
381.454	0	1	3
346.494	0	1	3
19.9142	0	1	3
[truncated: 221,233+ more rows]

## Sheet: Fig. S3b
BandPower	bool_idxsHFcomm	freq_band	channel							Frequency bands					ch: 1-16 FAF; 16-32 AC
-88.1097	1	1	1							1. delta
-48.8984	0	1	1							2. theta
-80.3425	0	1	1							3. alpha
-82.3694	0	1	1							4. beta1
-85.9677	1	1	1							5. beta2
-80.1643	1	1	1							6. gamma1
-68.2443	1	1	1							7. gamma2
-67.471	0	1	1							8. gamma3
-57.106	1	1	1
-81.5845	0	1	1
-78.1664	1	1	1
-67.0732	1	1	1
-84.1484	1	1	1
-93.027	1	1	1
652.763	0	1	1
1509.96	0	1	1
1057.8	0	1	1
1476.22	1	1	1
1303.05	1	1	1
1450.31	1	1	1
831.436	0	1	1
1633.66	1	1	1
700.923	0	1	1
797.828	0	1	1
912.24	1	1	1
968.423	0	1	1
824.345	1	1	1
1128.97	1	1	1
1622.65	1	1	1
1190.01	0	1	1
773.356	1	1	1
672.34	1	1	1
318.255	0	1	1
381.486	1	1	1
541.418	1	1	1
1002.87	0	1	1
435.408	0	1	1
760.241	1	1	1
1146.48	1	1	1
469.549	0	1	1
1527.03	1	1	1
1322.67	1	1	1
211.028	1	1	1
984.166	1	1	1
113.637	1	1	1
224.867	0	1	1
1054.63	1	1	1
1281.58	1	1	1
1274.26	1	1	1
331.356	1	1	1
386.505	0	1	1
26.1487	1	1	1
0.631937	1	1	1
144.879	1	1	1
-46.0559	1	1	1
84.1034	1	1	1
-23.3483	1	1	1
1246.1	1	1	1
49.4088	0	1	1
203.73	0	1	1
288.161	1	1	1
-10.801	0	1	1
34.9037	1	1	1
-19.0339	1	1	1
77.3445	1	1	1
-71.8914	1	1	1
260.445	1	1	1
-67.8324	1	1	1
20.905	1	1	1
8.58699	0	1	1
-6.59325	0	1	1
38.6358	1	1	1
26.8846	0	1	1
154.968	1	1	1
-20.1433	1	1	1
-35.8136	1	1	1
-51.889	0	1	1
13.4963	0	1	1
-53.3866	0	1	1
-39.6342	1	1	1
-66.3994	1	1	1
-50.0964	1	1	1
-63.8081	1	1	1
-40.6749	1	1	1
-88.6858	0	1	1
-89.1195	1	1	1
-63.9359	1	1	1
-89.8592	1	1	1
24.8948	1	1	1
7974.61	1	1	1
-32.0303	1	1	1
-8.3566	1	1	1
109.066	1	1	1
175.777	0	1	1
257.436	1	1	1
-19.256	1	1	1
1433.93	1	1	1
4176.5	1	1	1
-85.2765	0	1	1
405.201	0	1	1
4760.37	1	1	1
291.23	1	1	1
-19.4861	1	1	1
-77.2048	1	1	1
-75.4416	1	1	1
-80.9605	1	1	1
-71.167	0	1	1
91.9938	0	1	1
-39.2709	1	1	1
1115.64	1	1	1
-96.079	0	1	1
26.2243	1	1	1
427.974	1	1	1
-99.9837	1	1	1
-98.5972	0	1	1
-99.9996	0	1	1
-99.9995	0	1	1
768.343	0	1	1
748.788	1	1	1
2598.05	0	1	1
917.884	1	1	1
873.257	0	1	1
1422.29	0	1	1
414.884	1	1	1
916.101	1	1	1
1170.96	1	1	1
722.558	0	1	1
1274.06	1	1	1
961.69	1	1	1
854.578	0	1	1
556.176	0	1	1
774.673	1	1	1
1102.87	0	1	1
218.266	1	1	1
384.194	1	1	1
241.609	1	1	1
344.747	1	1	1
333.242	1	1	1
186.744	1	1	1
614.127	1	1	1
175.484	1	1	1
244.269	0	1	1
587.312	1	1	1
515.938	0	1	1
226.269	1	1	1
449.384	1	1	1
93.9215	1	1	1
389.742	1	1	1
415.093	1	1	1
276.095	0	1	1
484.171	1	1	1
72.7544	0	1	1
259.83	1	1	1
1575.26	1	1	1
971.09	0	1	1
1114.73	0	1	1
84.8853	1	1	1
10.8318	1	1	1
7.92851	0	1	1
136.703	1	1	1
2443.29	0	1	1
442.236	1	1	1
0.185398	1	1	1
557.525	1	1	1
-28.0084	1	1	1
31.5485	0	1	1
-39.5842	1	1	1
55.1568	1	1	1
-2.93065	0	1	1
173.08	1	1	1
-29.2214	1	1	1
32.9874	1	1	1
1367.95	1	1	1
1954.49	1	1	1
2461.48	0	1	1
957.037	1	1	1
1012	0	1	1
2186.24	1	1	1
2563.57	1	1	1
1585.1	1	1	1
1169.25	1	1	1
1364.69	0	1	1
2578.69	1	1	1
1615.47	1	1	1
1740.26	0	1	1
1620.11	1	1	1
2285.25	1	1	1
2265.74	1	1	1
3858.67	1	1	1
3274.02	1	1	1
377.112	1	1	1
1415.1	1	1	1
3106.46	0	1	1
816.751	1	1	1
529.716	0	1	1
1032.93	1	1	1
1067.88	0	1	1
406.338	1	1	1
498.513	0	1	1
1726.45	0	1	1
1023.54	1	1	1
388.448	0	1	1
1672.09	0	1	1
1566.69	0	1	1
555.34	1	1	1
887.659	1	1	1
15282.6	1	1	1
799.412	1	1	1
457.188	0	1	1
2703.7	0	1	1
1644.93	0	1	1
848.711	0	1	1
159.062	0	1	1
422.696	0	1	1
224.98	0	1	1
387.528	1	1	1
95.3816	1	1	1
30.7976	0	1	1
319.774	1	1	1
546.786	0	1	1
564.664	1	1	1
982.382	0	1	1
918.382	1	1	1
236.167	1	1	1
333.392	1	1	1
516.453	1	1	1
900.018	0	1	1
623.605	0	1	1
-28.6977	1	1	1
-92.8538	1	1	1
-79.7059	1	1	1
-83.0802	1	1	1
-57.9405	1	1	1
-34.6345	1	1	1
-68.5743	1	1	1
-29.2348	1	1	1
-41.177	1	1	1
-6.74344	1	1	1
-56.4822	1	1	1
-70.2444	1	1	1
-56.845	1	1	1
-23.1216	0	1	1
-4.15193	1	1	1
-77.0122	1	1	1
-9.99721	1	1	1
85.3942	1	1	1
-56.2801	1	1	1
160.804	1	1	1
38.3211	1	1	1
14.7951	1	1	1
-5.89849	1	1	1
81.8079	1	1	1
90.9011	1	1	1
74.987	1	1	1
-58.9361	1	1	1
-15.0861	1	1	1
58.752	1	1	1
7.62713	1	1	1
-78.9506	1	1	1
2.11383	1	1	1
-34.3215	0	1	1
-19.6324	0	1	1
-45.9946	1	1	1
-79.1492	1	1	1
-33.3748	1	1	1
-36.8302	1	1	1
-62.0798	1	1	1
-29.5827	0	1	1
-70.5925	1	1	1
12.0977	1	1	1
-27.5689	0	1	1
-74.4469	1	1	1
-28.1249	1	1	1
-57.6775	0	1	1
-34.9633	0	1	1
-58.0822	1	1	1
33.3911	1	1	1
-50.5182	1	1	1
-55.5112	1	1	1
-53.2945	0	1	1
-63.7542	1	1	1
-32.3983	1	1	1
-55.2126	1	1	1
-53.7569	0	1	1
-35.0253	1	1	1
-16.6112	1	1	1
-78.8093	1	1	1
-58.9231	1	1	1
-12.3499	1	1	1
-55.7496	1	1	1
-68.6989	1	1	1
-48.2212	0	1	1
-68.3488	0	1	1
-57.5904	0	1	1
-41.6176	1	1	1
-51.8783	1	1	1
-83.1819	1	1	1
-63.227	1	1	1
-35.181	1	1	1
-38.5983	1	1	1
-64.1677	1	1	1
-27.3424	1	1	1
-63.3928	1	1	1
-59.0452	0	1	1
-34.6195	1	1	1
-60.965	1	1	1
-67.2686	1	1	1
-53.8967	1	1	1
-57.9224	1	1	1
1721.3	0	1	1
255.036	1	1	1
97.5186	1	1	1
149.772	1	1	1
208.014	1	1	1
-9.9457	0	1	1
189.903	1	1	1
286.879	1	1	1
240.069	0	1	1
205.883	1	1	1
188.263	0	1	1
473.599	0	1	1
147.012	0	1	1
431.765	0	1	1
210.208	1	1	1
-24.4284	1	1	1
-30.3247	1	1	1
-7.82585	1	1	1
171.216	1	1	1
-19.0702	0	1	1
3150.28	1	1	1
131.894	1	1	1
5.55302	1	1	1
202.784	1	1	1
181.527	1	1	1
323.632	0	1	1
103.699	0	1	1
131.733	1	1	1
62.9559	1	1	1
-99.9998	1	1	1
-99.9998	1	1	1
-99.9997	1	1	1
-99.9999	1	1	1
-99.9996	1	1	1
-99.9986	1	1	1
-99.9996	0	1	1
-99.9995	1	1	1
-99.9998	0	1	1
-99.9998	1	1	1
-99.9998	0	1	1
-99.9996	0	1	1
-30.5489	1	1	1
19.4556	1	1	1
-8.25021	1	1	1
-53.2996	0	1	1
-20.0413	1	1	1
14.1772	1	1	1
54.0652	1	1	1
139.08	1	1	1
28.2334	1	1	1
85.5534	0	1	1
76.0096	0	1	1
21.1799	1	1	1
104.121	0	1	1
6.53651	1	1	1
487.678	1	1	1
-12.2752	1	1	1
5.66821	1	1	1
16.9585	1	1	1
65.7371	1	1	1
79.051	1	1	1
-50.575	1	1	1
103.164	1	1	1
-39.2124	1	1	1
82.8614	1	1	1
-5.88641	1	1	1
62.4377	1	1	1
103.028	1	1	1
-38.195	0	1	1
116.459	1	1	1
1.15324	1	1	1
42.3291	0	1	1
27.3882	1	1	1
-19.6229	0	1	1
-27.7881	0	1	1
71.5374	0	1	1
17.4995	0	1	1
189.476	1	1	1
126.503	1	1	1
53.8431	1	1	1
27.8693	1	1	1
114.975	0	1	1
124.525	0	1	1
35.1813	0	1	1
27.337	1	1	1
23.774	1	1	1
165.87	1	1	1
4.91529	0	1	1
29.8896	1	1	1
-30.2476	1	1	1
34.4571	1	1	1
16.3056	1	1	1
15.65	1	1	1
56.3158	1	1	1
9.2203	1	1	1
-35.2868	1	1	1
-84.8959	1	1	1
27.1649	0	1	1
45.5787	1	1	1
-45.9751	0	1	1
-46.0853	0	1	1
10.5416	1	1	1
-67.348	1	1	1
0.0397886	1	1	1
-13.4615	1	1	1
-80.9553	1	1	1
-37.4261	1	1	1
-44.1163	0	1	1
21.9392	1	1	1
-4.15104	1	1	1
-6.1249	0	1	1
-80.7301	0	1	1
-18.1664	0	1	1
-73.9889	1	1	1
-12.7378	1	1	1
76.0515	1	1	1
-52.9108	1	1	1
-32.6212	1	1	1
-45.3009	1	1	1
-60.1112	0	1	1
-45.777	0	1	1
-41.4614	1	1	1
-40.9011	0	1	1
-46.4778	0	1	1
-51.0932	1	1	1
-40.3353	1	1	1
-82.135	1	1	1
-42.8927	0	1	1
-14.2653	1	1	1
-47.1035	1	1	1
-12.8408	0	1	1
99.9728	1	1	1
-59.7722	1	1	1
4.92072	0	1	1
-35.0575	0	1	1
596.639	1	1	1
-47.5469	0	1	1
-25.4366	0	1	1
564.32	1	1	1
368.411	0	1	1
-45.0566	1	1	1
-52.9022	1	1	1
-15.2887	1	1	1
-78.3924	1	1	1
44.2226	1	1	1
-26.0074	1	1	1
171.401	1	1	1
701.851	1	1	1
308.571	0	1	1
135.249	1	1	1
67.233	0	1	1
-15.5825	1	1	1
132.781	1	1	1
78.5447	1	1	1
528.177	1	1	1
-40.082	1	1	1
-22.316	1	1	1
574.928	0	1	1
-19.7882	1	1	1
194.901	1	1	1
13.7073	1	1	1
33.7388	1	1	1
522.26	1	1	1
462.901	1	1	1
270.462	1	1	1
27.1424	1	1	1
39.4214	1	1	1
242.534	0	1	1
366.264	1	1	1
1444.19	1	1	1
419.609	1	1	1
1219.8	0	1	1
237.106	1	1	1
1383.23	1	1	1
2325.58	0	1	1
4493.12	1	1	1
1012.18	1	1	1
785.076	1	1	1
161.154	1	1	1
1297.36	0	1	1
1320.25	1	1	1
696.905	1	1	1
1607.36	1	1	1
1235.63	0	1	1
1086.89	0	1	1
911.297	1	1	1
690.11	1	1	1
962.531	1	1	1
722.582	0	1	1
63.4045	0	1	1
-11.911	1	1	1
582.436	1	1	1
1611.35	0	1	1
1904.36	1	1	1
149.94	1	1	1
546.823	0	1	1
1974.84	1	1	1
1731.01	0	1	1
634.156	0	1	1
789.826	1	1	1
338.306	0	1	1
359.507	1	1	1
448.544	0	1	1
731.446	1	1	1
347.108	0	1	1
374.36	1	1	1
345.417	1	1	1
657.975	0	1	1
-64.1328	1	1	1
241.328	1	1	1
288.509	1	1	1
134.195	1	1	1
800.965	0	1	1
555.13	1	1	1
1014.37	1	1	1
502.191	1	1	1
311.976	1	1	1
38.6569	1	1	1
251.402	1	1	1
922.244	0	1	1
333.396	1	1	1
675.788	1	1	1
808.034	1	1	1
-44.5217	0	1	1
-35.1447	0	1	1
-78.6609	1	1	1
-81.6162	1	1	1
-20.3139	1	1	1
-48.6476	1	1	1
4.22672	1	1	1
-69.241	0	1	1
-66.3488	1	1	1
-59.0367	1	1	1
40.2824	1	1	1
4.08958	1	1	1
-21.3023	1	1	1
-64.7176	1	1	1
-16.3461	1	1	1
62.4325	1	1	1
8.00156	1	1	1
43.6111	0	1	1
-69.1836	1	1	1
-30.4944	1	1	1
-9.18162	1	1	1
-59.6149	1	1	1
-65.4966	1	1	1
-65.2899	1	1	1
258.729	1	1	1
-3.2377	1	1	1
-60.4885	1	1	1
-64.151	0	1	1
-48.633	1	1	1
109.261	0	1	1
-13.2605	0	1	1
72.2349	1	1	1
175.434	1	1	1
-85.8117	0	1	1
6.50788	1	1	1
155.661	0	1	1
245.711	0	1	1
-26.2749	0	1	1
195.489	0	1	1
161.967	0	1	1
73.8729	1	1	1
118.339	1	1	1
133.898	0	1	1
-66.4944	1	1	1
115.19	0	1	1
35.5209	1	1	1
71.5144	0	1	1
167.476	1	1	1
-10.092	0	1	1
49.8513	0	1	1
41.1227	0	1	1
-48.7799	1	1	1
28.4788	0	1	1
25.7315	0	1	1
10.1221	0	1	1
15.3653	0	1	1
10.9246	0	1	1
138.175	0	1	1
36.9809	0	1	1
-54.4928	0	1	1
-7.47855	1	1	1
-50.5205	1	1	1
-9.43551	0	1	1
59.7655	0	1	1
81.9955	0	1	1
29.076	1	1	1
113.633	0	1	1
-9.82176	0	1	1
402.01	1	1	1
309.171	1	1	1
-34.4738	1	1	1
235.269	0	1	1
94.1382	1	1	1
290.128	0	1	1
397.057	0	1	1
190.484	1	1	1
1165.15	0	1	1
205.875	1	1	1
184.119	0	1	1
139.694	0	1	1
93.2986	0	1	1
-25.3987	1	1	1
104.108	0	1	1
336.248	0	1	1
96.6196	0	1	1
56.2284	0	1	1
114.376	0	1	1
69.8875	0	1	1
82.349	0	1	1
103.714	0	1	1
-64.7299	0	1	1
224.578	1	1	1
181.982	1	1	1
31.5175	0	1	1
156.627	1	1	1
172.631	1	1	1
100.273	1	1	1
82.9592	0	1	1
373.905	1	1	1
-11.0712	0	1	1
6.83705	0	1	1
-87.7944	0	1	1
-70.0658	1	1	1
-66.028	0	1	1
-93.6762	0	1	1
-73.45	0	1	1
-81.0795	1	1	1
-67.429	1	1	1
-89.9241	1	1	1
-75.6569	1	1	1
-67.9174	1	1	1
-62.7947	0	1	1
-51.3125	0	1	1
-66.4041	1	1	1
-29.3808	1	1	1
9.67698	0	1	1
-64.6638	1	1	1
-58.2005	0	1	1
-95.3945	0	1	1
-54.3656	1	1	1
-59.5539	1	1	1
-27.4751	0	1	1
-95.5182	1	1	1
13.3683	1	1	1
-68.2237	0	1	1
-77.7466	1	1	1
-96.3067	0	1	1
-95.2248	1	1	1
-63.4288	1	1	1
-65.0839	1	1	1
-25.9662	0	1	1
-24.4267	1	1	1
-54.603	1	1	1
-17.8453	1	1	1
7.59885	1	1	1
-47.0219	1	1	1
-27.121	1	1	1
33.6329	1	1	1
74.9604	0	1	1
-38.8748	1	1	1
-14.1606	1	1	1
-5.05491	1	1	1
-28.4203	1	1	1
-29.3449	1	1	1
3.61264	0	1	1
107.42	1	1	1
-24.1064	1	1	1
827.855	1	1	1
1263.12	1	1	1
1229.13	0	1	1
718.71	1	1	1
247.329	0	1	1
491.495	1	1	1
717.974	0	1	1
299.9	1	1	1
-70.297	0	1	1
11.0377	0	1	1
-61.4973	1	1	1
-44.6095	1	1	1
-65.2061	1	1	1
283.131	1	1	1
-50.8535	1	1	1
-47.3773	1	1	1
-36.1991	1	1	1
-30.9115	1	1	1
302.162	1	1	1
-42.5546	1	1	1
-56.6613	1	1	1
-52.3889	1	1	1
74.6166	1	1	1
-76.3556	1	1	1
448.666	0	1	1
-78.6737	0	1	1
252.609	0	1	1
-66.0758	0	1	1
-49.2544	0	1	1
18.9474	0	1	1
128.838	0	1	1
-34.6882	0	1	1
-61.1174	0	1	1
-2.25527	0	1	1
9.3654	0	1	1
40.9433	0	1	1
87.7268	0	1	1
1.47779	1	1	1
74.7689	1	1	1
35.8561	1	1	1
-31.6525	1	1	1
97.1859	1	1	1
-73.5358	1	1	1
89.6595	1	1	1
-27.8173	0	1	1
37.8783	1	1	1
-41.7554	1	1	1
20.0189	1	1	1
-24.4202	1	1	1
1.68546	1	1	1
114.313	1	1	1
233.643	1	1	1
13.9789	1	1	1
-28.4567	1	1	1
66.898	0	1	1
-46.803	1	1	1
1.31637	0	1	1
-1.68426	0	1	1
37.848	0	1	1
251.923	0	1	1
47.0219	0	1	1
91.874	0	1	1
182.777	0	1	1
70.0382	0	1	1
80.9886	0	1	1
-24.9776	1	1	1
-49.2967	1	1	1
38.4887	1	1	1
27.078	1	1	1
61.8838	1	1	1
153.401	0	1	1
32.7075	0	1	1
24.7154	1	1	1
20.8619	1	1	1
-13.7754	1	1	1
127.61	0	1	1
-8.96996	1	1	1
-11.2254	1	1	1
-71.5048	1	1	1
-70.6098	1	1	1
-77.4535	1	1	1
-63.2488	1	1	1
-80.7171	1	1	1
-66.9037	1	1	1
-82.5991	1	1	1
-63.2918	0	1	1
-60.3914	0	1	1
-87.503	1	1	1
-71.0504	0	1	1
-87.6322	1	1	1
-71.9433	0	1	1
-84.8422	1	1	1
-59.0811	1	1	1
-57.8623	0	1	1
-38.8158	1	1	1
-63.5639	1	1	1
-82.0904	1	1	1
-66.4614	1	1	1
-62.9329	1	1	1
-73.6513	1	1	1
-93.7664	1	1	1
-87.4199	1	1	1
-79.1789	1	1	1
-59.6313	1	1	1
-69.3871	1	1	1
-64.8556	1	1	1
-64.3953	1	1	1
-71.3307	1	1	1
-73.9333	1	1	1
-74.2152	0	1	1
-77.2883	1	1	1
-68.6884	0	1	1
-81.9936	0	1	1
-80.4022	1	1	1
-68.3272	1	1	1
-70.9903	0	1	1
-63.4301	0	1	1
-84.8787	0	1	1
-59.4425	0	1	1
-75.5765	1	1	1
-61.9434	1	1	1
-75.0576	1	1	1
-77.1544	1	1	1
-36.0274	1	1	1
-85.1617	1	1	1
-63.8097	0	1	1
-76.2031	1	1	1
-68.5286	0	1	1
157.489	0	1	1
27.9667	1	1	1
8.85497	1	1	1
240.851	1	1	1
99.5528	1	1	1
148.226	1	1	1
147.42	1	1	1
434.601	1	1	1
142.761	1	1	1
474.409	1	1	1
249.299	1	1	1
136.568	0	1	1
34.6803	1	1	1
260.812	1	1	1
258.833	1	1	1
2541.93	1	1	1
590.54	1	1	1
1967.74	0	1	1
582.271	1	1	1
231.494	0	1	1
861.087	1	1	1
717.37	1	1	1
275.827	1	1	1
34.2278	1	1	1
668.783	1	1	1
438.111	1	1	1
591.756	1	1	1
129.848	1	1	1
50.8458	1	1	1
325.711	1	1	1
102.024	0	1	1
865.789	1	1	1
-7.29051	0	1	1
1417.19	1	1	1
557.163	1	1	1
901.756	1	1	1
735.145	0	1	1
772.533	1	1	1
212.281	1	1	1
187.269	1	1	1
550.653	1	1	1
1881.18	1	1	1
1015.09	0	1	1
473.144	0	1	1
831.132	0	1	1
288.803	0	1	1
817.288	1	1	1
805.895	1	1	1
484.334	1	1	1
681.39	1	1	1
247.657	0	1	1
384.17	1	1	1
713.041	0	1	1
15.351	0	1	1
-45.2524	0	1	1
70.6146	1	1	1
671.5	1	1	1
136.211	1	1	1
239.507	0	1	1
1117.94	1	1	1
212.418	1	1	1
-8.04568	0	1	1
150.266	0	1	1
332.227	0	1	1
112.644	0	1	1
-86.0833	1	1	2
-59.9986	0	1	2
-80.2384	0	1	2
-90.1263	0	1	2
-79.8778	1	1	2
-69.6256	1	1	2
-50.0541	1	1	2
-61.1162	0	1	2
-46.5448	1	1	2
-77.36	0	1	2
-83.745	1	1	2
-75.7897	1	1	2
-85.887	1	1	2
-93.24	1	1	2
554.008	0	1	2
1290.11	0	1	2
1043.75	0	1	2
1290.31	1	1	2
1073.78	1	1	2
1299.19	1	1	2
694.833	0	1	2
1442.92	1	1	2
412.029	0	1	2
492.786	0	1	2
557.529	1	1	2
549.212	0	1	2
542.935	1	1	2
715.147	1	1	2
287.54	1	1	2
768.702	0	1	2
536.975	1	1	2
464.772	1	1	2
221.737	0	1	2
250.568	1	1	2
381.405	1	1	2
748.532	0	1	2
285.116	0	1	2
535.042	1	1	2
796.837	1	1	2
313.049	0	1	2
1097.53	1	1	2
952.401	1	1	2
106.115	1	1	2
732.665	1	1	2
54.1972	1	1	2
149.304	0	1	2
760.391	1	1	2
935.125	1	1	2
940.677	1	1	2
230.795	1	1	2
265.079	0	1	2
-13.2571	1	1	2
-14.5786	1	1	2
-54.3485	1	1	2
-78.0353	1	1	2
93.9599	1	1	2
-81.0989	1	1	2
-72.2782	1	1	2
-70.3605	0	1	2
-47.9477	0	1	2
233.926	1	1	2
-32.1869	0	1	2
21.6082	1	1	2
334.09	1	1	2
78.847	1	1	2
1.12353	1	1	2
236.366	1	1	2
84.3073	1	1	2
238.455	1	1	2
421.122	0	1	2
285.566	0	1	2
67.8672	1	1	2
-28.2913	0	1	2
182.704	1	1	2
-50.2665	1	1	2
-48.9732	1	1	2
-55.8815	0	1	2
10.9239	0	1	2
-52.4861	0	1	2
-40.0254	1	1	2
-64.8066	1	1	2
-44.4478	1	1	2
-60.5206	1	1	2
-38.663	1	1	2
-85.8353	0	1	2
-85.8838	1	1	2
-54.5739	1	1	2
-84.9612	1	1	2
1202.6	1	1	2
3971.65	1	1	2
620.211	1	1	2
759.849	1	1	2
1688.43	1	1	2
977.68	0	1	2
1103.14	1	1	2
746.741	1	1	2
18751	1	1	2
14640.4	1	1	2
358.112	0	1	2
1625.31	0	1	2
11125	1	1	2
3920.95	1	1	2
1016.91	1	1	2
283.149	1	1	2
233.965	1	1	2
170.247	1	1	2
197.721	0	1	2
896.083	0	1	2
369.721	1	1	2
1752.69	1	1	2
293.575	0	1	2
783.626	1	1	2
3033.35	1	1	2
203.491	1	1	2
562.678	0	1	2
1349.58	0	1	2
261.528	0	1	2
666.121	0	1	2
641.081	1	1	2
2295.39	0	1	2
795.95	1	1	2
759.796	0	1	2
1219.35	0	1	2
329.874	1	1	2
771.249	1	1	2
1036.35	1	1	2
598.181	0	1	2
1057.81	1	1	2
809.865	1	1	2
708.441	0	1	2
439.063	0	1	2
638.715	1	1	2
891.467	0	1	2
162.498	1	1	2
297.924	1	1	2
179.122	1	1	2
266.093	1	1	2
275.733	1	1	2
144.424	1	1	2
513.535	1	1	2
126.032	1	1	2
193.281	0	1	2
487.624	1	1	2
428.559	0	1	2
168.688	1	1	2
362.07	1	1	2
68.4548	1	1	2
309.479	1	1	2
335.887	1	1	2
214.591	0	1	2
382.501	1	1	2
4.80351	0	1	2
134.819	1	1	2
1187.77	1	1	2
693.392	0	1	2
814.923	0	1	2
37.0188	1	1	2
-13.1086	1	1	2
-19.3958	0	1	2
72.7648	1	1	2
1899.76	0	1	2
341.25	1	1	2
-18.8741	1	1	2
423.178	1	1	2
-0.775257	1	1	2
95.5551	0	1	2
-13.121	1	1	2
84.4763	1	1	2
22.1067	0	1	2
281.286	1	1	2
-8.01853	1	1	2
92.2464	1	1	2
1475.95	1	1	2
2057.29	1	1	2
2531.75	0	1	2
949.868	1	1	2
786.139	0	1	2
1493.98	1	1	2
1914.74	1	1	2
1767.77	1	1	2
1235.52	1	1	2
1459.1	0	1	2
1590.52	1	1	2
1689.26	1	1	2
1837.73	0	1	2
1452.63	1	1	2
2331.15	1	1	2
2252.02	1	1	2
2640.63	1	1	2
2102.4	1	1	2
347.3	1	1	2
1508.74	1	1	2
3277.56	0	1	2
1210.32	1	1	2
863.116	0	1	2
1518	1	1	2
1707.21	0	1	2
686.133	1	1	2
813.85	0	1	2
2745.97	0	1	2
951.953	1	1	2
373.224	0	1	2
1578.47	0	1	2
1528.24	0	1	2
504.125	1	1	2
754.427	1	1	2
5031.05	1	1	2
737.425	1	1	2
400.427	0	1	2
2861.88	0	1	2
1633.74	0	1	2
1264.52	0	1	2
133.265	0	1	2
511.962	0	1	2
221.593	0	1	2
325.459	1	1	2
60.557	1	1	2
17.3823	0	1	2
276.966	1	1	2
477.647	0	1	2
478.776	1	1	2
1015.75	0	1	2
364.602	1	1	2
166.194	1	1	2
287.188	1	1	2
415.446	1	1	2
791.017	0	1	2
455.835	0	1	2
15.8481	1	1	2
-87.727	1	1	2
-65.9124	1	1	2
-67.93	1	1	2
-28.1368	1	1	2
15.3111	1	1	2
-45.5044	1	1	2
39.4904	1	1	2
15.7938	1	1	2
98.0863	1	1	2
-10.6218	1	1	2
-39.8562	1	1	2
-12.7715	1	1	2
24.3772	0	1	2
59.213	1	1	2
-60.2389	1	1	2
52.849	1	1	2
223.775	1	1	2
-20.7126	1	1	2
365.266	1	1	2
109.714	1	1	2
78.1326	1	1	2
52.2955	1	1	2
184.899	1	1	2
199.024	1	1	2
178.982	1	1	2
-38.7596	1	1	2
28.2278	1	1	2
121.505	1	1	2
71.34	1	1	2
-72.7032	1	1	2
35.5344	1	1	2
-26.1591	0	1	2
12.9723	0	1	2
-31.1074	1	1	2
-70.1988	1	1	2
83.1188	1	1	2
36.9713	1	1	2
-21.569	1	1	2
41.5168	0	1	2
-46.7007	1	1	2
121.384	1	1	2
41.8684	0	1	2
-49.9281	1	1	2
40.6154	1	1	2
-15.1161	0	1	2
27.887	0	1	2
-17.2437	1	1	2
182.077	1	1	2
2.3005	1	1	2
-5.65054	1	1	2
-2.61682	0	1	2
-22.7219	1	1	2
51.2948	1	1	2
-3.69402	1	1	2
-7.78414	0	1	2
33.732	1	1	2
70.8	1	1	2
-58.0469	1	1	2
-8.03204	1	1	2
74.338	1	1	2
-12.7638	1	1	2
-36.3715	1	1	2
6.59613	0	1	2
-30.8528	0	1	2
-18.3256	0	1	2
23.2284	1	1	2
7.98308	1	1	2
-65.2579	1	1	2
-10.2774	1	1	2
64.9558	1	1	2
20.389	1	1	2
-12.3756	1	1	2
94.2012	1	1	2
-32.2486	1	1	2
-14.6265	0	1	2
-8.38235	1	1	2
-9.26649	1	1	2
-35.9435	1	1	2
-6.59332	1	1	2
-13.414	1	1	2
2116.68	0	1	2
295.82	1	1	2
129.055	1	1	2
185.667	1	1	2
262.379	1	1	2
4.333	0	1	2
232.653	1	1	2
366.733	1	1	2
300.733	0	1	2
276.588	1	1	2
230.437	0	1	2
554.262	0	1	2
185.272	0	1	2
527.86	0	1	2
291.837	1	1	2
4.75064	1	1	2
-15.0565	1	1	2
29.7424	1	1	2
317.633	1	1	2
28.7827	0	1	2
208.706	1	1	2
228.439	1	1	2
51.9209	1	1	2
282.965	1	1	2
296.566	1	1	2
501.592	0	1	2
203.536	0	1	2
216.239	1	1	2
219.236	1	1	2
369.019	1	1	2
63.6177	1	1	2
871.962	1	1	2
1669.49	1	1	2
734.433	1	1	2
482.391	1	1	2
1253.28	0	1	2
-45.2664	1	1	2
589.214	0	1	2
748.115	1	1	2
988.922	0	1	2
-55.8988	0	1	2
0.12985	1	1	2
37.8679	1	1	2
3.97352	1	1	2
-37.3565	0	1	2
-3.47831	1	1	2
54.0496	1	1	2
80.9087	1	1	2
177.892	1	1	2
47.7243	1	1	2
106.369	0	1	2
109.176	0	1	2
39.2089	1	1	2
140.876	0	1	2
22.6823	1	1	2
521.295	1	1	2
-1.79737	1	1	2
28.4098	1	1	2
41.9685	1	1	2
103.353	1	1	2
116.097	1	1	2
-25.9691	1	1	2
152.506	1	1	2
-17.3497	1	1	2
120.802	1	1	2
-1.54361	1	1	2
112.184	1	1	2
139.804	1	1	2
-25.6661	0	1	2
143.441	1	1	2
28.6154	1	1	2
46.2463	0	1	2
-40.8239	1	1	2
-8.89768	0	1	2
-21.2839	0	1	2
112.159	0	1	2
29.5883	0	1	2
203.665	1	1	2
102.973	1	1	2
111.829	1	1	2
17.5191	1	1	2
146.624	0	1	2
100.295	0	1	2
57.1089	0	1	2
37.9006	1	1	2
42.7973	1	1	2
241.213	1	1	2
-12.118	0	1	2
37.4462	1	1	2
3.77831	1	1	2
49.9627	1	1	2
-30.8057	1	1	2
14.4865	1	1	2
94.4916	1	1	2
18.5698	1	1	2
-37.2406	1	1	2
-76.8604	1	1	2
13.5361	0	1	2
11.4885	1	1	2
-35.8959	0	1	2
-28.0151	0	1	2
-9.74963	1	1	2
-61.5967	1	1	2
12.8379	1	1	2
16.9376	1	1	2
-73.4354	1	1	2
-39.4264	1	1	2
-39.4972	0	1	2
20.3081	1	1	2
44.3066	1	1	2
-16.6273	0	1	2
-77.0275	0	1	2
-29.5257	0	1	2
-58.2268	1	1	2
12.1731	1	1	2
132.166	1	1	2
-55.864	1	1	2
-36.0308	1	1	2
-41.8944	1	1	2
-38.3235	0	1	2
-37.0783	0	1	2
-24.2245	1	1	2
-20.2592	0	1	2
125.246	0	1	2
-52.6088	1	1	2
-30.4381	1	1	2
-74.2767	1	1	2
-18.5325	0	1	2
4.38949	1	1	2
-29.5597	1	1	2
38.6137	0	1	2
184.998	1	1	2
-58.7657	1	1	2
2.08631	0	1	2
-44.8788	0	1	2
72.384	1	1	2
-47.9257	0	1	2
-18.4548	0	1	2
-60.911	1	1	2
-59.0388	0	1	2
-15.5257	1	1	2
-32.1631	1	1	2
28.3795	1	1	2
-77.2591	1	1	2
-18.104	1	1	2
-23.0992	1	1	2
291.235	1	1	2
1062.16	1	1	2
485.218	0	1	2
233.054	1	1	2
131.139	0	1	2
13.9108	1	1	2
228.682	1	1	2
151.217	1	1	2
777.054	1	1	2
-18.539	1	1	2
3.10786	1	1	2
843.984	0	1	2
7.62099	1	1	2
316.896	1	1	2
73.6075	1	1	2
80.5081	1	1	2
690.147	1	1	2
619.365	1	1	2
374.127	1	1	2
60.1682	1	1	2
86.423	1	1	2
356.81	0	1	2
468.885	1	1	2
1861.51	1	1	2
551.912	1	1	2
1646.34	0	1	2
316.255	1	1	2
1129.43	1	1	2
1985.09	0	1	2
1100.82	1	1	2
814.98	1	1	2
608.478	1	1	2
116.335	1	1	2
1044.16	0	1	2
1060.58	1	1	2
551.297	1	1	2
1348.47	1	1	2
1011.25	0	1	2
882.143	0	1	2
728.943	1	1	2
542.064	1	1	2
677.86	1	1	2
562.332	0	1	2
17.5255	0	1	2
-38.8707	1	1	2
491.316	1	1	2
1276.03	0	1	2
1487.62	1	1	2
84.1986	1	1	2
405.916	0	1	2
1451.19	1	1	2
1386.2	0	1	2
619.006	0	1	2
769.493	1	1	2
395.596	0	1	2
326.39	1	1	2
413.674	0	1	2
709.304	1	1	2
330.205	0	1	2
353.625	1	1	2
316.198	1	1	2
651.298	0	1	2
-65.7789	1	1	2
221.866	1	1	2
279.752	1	1	2
109.225	1	1	2
717.463	0	1	2
502.909	1	1	2
922.359	1	1	2
454.678	1	1	2
279.999	1	1	2
24.3195	1	1	2
227.818	1	1	2
848.943	0	1	2
309.132	1	1	2
606.894	1	1	2
745.392	1	1	2
-11.6299	0	1	2
2.59533	0	1	2
-64.4566	1	1	2
-72.2379	1	1	2
29.0482	1	1	2
-16.1268	1	1	2
66.1361	1	1	2
-48.9958	0	1	2
-40.9985	1	1	2
-52.1838	1	1	2
55.741	1	1	2
11.5216	1	1	2
-11.8264	1	1	2
-60.1324	1	1	2
-2.09802	1	1	2
87.346	1	1	2
22.6671	1	1	2
71.0678	0	1	2
-64.8149	1	1	2
-18.9731	1	1	2
4.69986	1	1	2
-53.1474	1	1	2
-59.7141	1	1	2
-58.4468	1	1	2
314.679	1	1	2
9.62425	1	1	2
-54.763	1	1	2
-60.5436	0	1	2
-43.5069	1	1	2
131.234	0	1	2
-2.86288	0	1	2
74.8826	1	1	2
134.491	1	1	2
-92.5314	0	1	2
9.31613	1	1	2
152.635	0	1	2
234.937	0	1	2
-28.6633	0	1	2
195.824	0	1	2
134.126	0	1	2
5.7866	1	1	2
106.347	1	1	2
139.809	0	1	2
-69.882	1	1	2
105.418	0	1	2
35.2731	1	1	2
60.878	0	1	2
145.15	1	1	2
-23.7805	0	1	2
17.2028	0	1	2
22.1516	0	1	2
-59.5646	1	1	2
13.9941	0	1	2
9.74733	0	1	2
-8.00402	0	1	2
4.91851	0	1	2
-2.14489	0	1	2
-7.29632	0	1	2
26.1704	0	1	2
-38.3156	0	1	2
-17.25	1	1	2
-55.6303	1	1	2
-16.4837	0	1	2
50.1219	0	1	2
65.6617	0	1	2
-9.833	1	1	2
96.3677	0	1	2
79.8079	0	1	2
896.431	1	1	2
714.179	1	1	2
30.1242	1	1	2
627.797	0	1	2
260.303	1	1	2
565.728	0	1	2
1119.61	0	1	2
460.032	1	1	2
2538.67	0	1	2
508.353	1	1	2
879.844	0	1	2
592.201	0	1	2
525.891	0	1	2
144.483	1	1	2
490.93	0	1	2
1182.95	0	1	2
454.424	0	1	2
375.284	0	1	2
655.065	0	1	2
475.093	0	1	2
621.688	0	1	2
287.393	0	1	2
122.478	0	1	2
847.04	1	1	2
649.858	1	1	2
314.941	0	1	2
698.467	1	1	2
840.225	1	1	2
552.255	1	1	2
470.142	0	1	2
808.289	1	1	2
1.10575	0	1	2
20.5959	0	1	2
-80.7115	0	1	2
-65.7466	1	1	2
-58.6822	0	1	2
-92.1929	0	1	2
-64.1946	0	1	2
-74.7757	1	1	2
-57.043	1	1	2
-86.6139	1	1	2
-69.1385	1	1	2
-58.3663	1	1	2
-52.0181	0	1	2
-35.3048	0	1	2
-54.6615	1	1	2
2.74308	1	1	2
47.9806	0	1	2
-51.7792	1	1	2
-38.6627	0	1	2
-95.6571	0	1	2
-41.4888	1	1	2
-49.1857	1	1	2
-18.164	0	1	2
-95.0446	1	1	2
30.7596	1	1	2
-64.4684	0	1	2
-73.6825	1	1	2
-95.3313	0	1	2
-93.9223	1	1	2
-57.5953	1	1	2
-58.349	1	1	2
-14.9864	0	1	2
-13.8421	1	1	2
-47.3466	1	1	2
-6.26958	1	1	2
23.0226	1	1	2
-43.4882	1	1	2
-15.7115	1	1	2
42.007	1	1	2
93.2433	0	1	2
-37.5246	1	1	2
-7.37589	1	1	2
6.84527	1	1	2
-22.8477	1	1	2
-23.6886	1	1	2
10.381	0	1	2
127.236	1	1	2
-18.5547	1	1	2
533.633	1	1	2
845.967	1	1	2
801.352	0	1	2
497.636	1	1	2
141.798	0	1	2
328.564	1	1	2
490.719	0	1	2
193.493	1	1	2
-64.6468	0	1	2
107.762	0	1	2
-26.5856	1	1	2
8.11321	1	1	2
-37.8129	1	1	2
637.858	1	1	2
-13.8126	1	1	2
4.49291	1	1	2
24.1298	1	1	2
33.3635	1	1	2
645.672	1	1	2
5.56036	1	1	2
-22.1288	1	1	2
-19.8348	1	1	2
229.417	1	1	2
-57.6941	1	1	2
909.028	0	1	2
-67.6956	0	1	2
567.195	0	1	2
-45.6137	0	1	2
-4.79683	0	1	2
121.122	0	1	2
323.349	0	1	2
12.6046	0	1	2
-22.9834	0	1	2
99.108	0	1	2
94.9269	0	1	2
166.63	0	1	2
250.469	0	1	2
70.6131	1	1	2
212.062	1	1	2
172.299	1	1	2
29.263	1	1	2
281.893	1	1	2
-54.28	1	1	2
253.392	1	1	2
24.0492	0	1	2
153.1	1	1	2
-7.35061	1	1	2
112.894	1	1	2
29.8956	1	1	2
77.9595	1	1	2
309.246	1	1	2
517.979	1	1	2
107.878	1	1	2
37.1379	1	1	2
216.79	0	1	2
8.48289	1	1	2
78.9295	0	1	2
82.8861	0	1	2
141.39	0	1	2
559.078	0	1	2
170.62	0	1	2
249.089	0	1	2
438.345	0	1	2
193.825	0	1	2
230.451	0	1	2
36.9513	1	1	2
-15.4705	1	1	2
157.031	1	1	2
126.993	1	1	2
198.076	1	1	2
363.481	0	1	2
161.19	0	1	2
130.044	1	1	2
132.829	1	1	2
56.4091	1	1	2
335.4	0	1	2
66.1599	1	1	2
67.659	1	1	2
-57.1322	1	1	2
-56.9682	1	1	2
-51.2531	1	1	2
-16.2155	1	1	2
-56.1665	1	1	2
-10.5447	1	1	2
-50.5265	1	1	2
-11.6327	0	1	2
-25.1746	0	1	2
-78.8207	1	1	2
-47.6044	0	1	2
-75.1186	1	1	2
-32.7987	0	1	2
-62.1863	1	1	2
-10.611	1	1	2
-0.459305	0	1	2
48.1748	1	1	2
-14.1762	1	1	2
-51.5753	1	1	2
-13.277	1	1	2
-18.9818	1	1	2
-38.4429	1	1	2
-79.6455	1	1	2
-72.1501	1	1	2
-45.8627	1	1	2
-34.0264	1	1	2
-21.958	1	1	2
-15.6099	1	1	2
-34.5424	1	1	2
-28.0662	1	1	2
-41.6997	1	1	2
-30.518	0	1	2
10.5063	1	1	2
-40.062	0	1	2
-39.0757	0	1	2
-47.8949	1	1	2
-32.3865	1	1	2
-37.5297	0	1	2
19.2211	0	1	2
-74.7131	0	1	2
-11.8279	0	1	2
12.0059	1	1	2
-14.161	1	1	2
-49.2276	1	1	2
-14.8371	1	1	2
59.2984	1	1	2
-74.1912	1	1	2
-18.8956	0	1	2
-63.8879	1	1	2
-1.29823	0	1	2
222.751	0	1	2
85.9252	1	1	2
41.5887	1	1	2
586.77	1	1	2
137.635	1	1	2
186.242	1	1	2
188.128	1	1	2
505.976	1	1	2
166.116	1	1	2
560.393	1	1	2
275.312	1	1	2
185.199	0	1	2
52.5152	1	1	2
311.114	1	1	2
308.527	1	1	2
2861.16	1	1	2
709.956	1	1	2
2184.24	0	1	2
650.656	1	1	2
292.843	0	1	2
908.565	1	1	2
799.937	1	1	2
301.234	1	1	2
24.9095	1	1	2
690.442	1	1	2
458.211	1	1	2
628.693	1	1	2
129.032	1	1	2
-10.4604	1	1	2
326.473	1	1	2
146.076	0	1	2
936.481	1	1	2
-21.7449	0	1	2
1542.89	1	1	2
654.366	1	1	2
979.695	1	1	2
802.931	0	1	2
829.475	1	1	2
216.604	1	1	2
230.624	1	1	2
660.764	1	1	2
1983.42	1	1	2
1039.43	0	1	2
535.7	0	1	2
904.303	0	1	2
268.844	0	1	2
927.553	1	1	2
897.089	1	1	2
427.394	1	1	2
745.03	1	1	2
278.609	0	1	2
420.054	1	1	2
770.234	0	1	2
42.3772	0	1	2
-48.8982	0	1	2
76.0676	1	1	2
668.648	1	1	2
126.353	1	1	2
266.021	0	1	2
1211.7	1	1	2
232.275	1	1	2
-17.2006	0	1	2
179.707	0	1	2
384.496	0	1	2
128.697	0	1	2
-1.39343	1	1	3
-68.1797	0	1	3
-64.0544	0	1	3
-89.5842	0	1	3
-43.1542	1	1	3
-50.5654	1	1	3
1.34418	1	1	3
-62.6602	0	1	3
-51.9205	1	1	3
-49.7975	0	1	3
-21.869	1	1	3
-82.7991	1	1	3
-82.2029	1	1	3
-47.8376	1	1	3
210.422	0	1	3
604.887	0	1	3
519.69	0	1	3
642.933	1	1	3
449.71	1	1	3
594.831	1	1	3
251.919	0	1	3
659.848	1	1	3
214.702	0	1	3
275.311	0	1	3
306.603	1	1	3
294.659	0	1	3
246.172	1	1	3
430.62	1	1	3
110.977	1	1	3
505.319	0	1	3
331.645	1	1	3
279.342	1	1	3
111.972	0	1	3
133.645	1	1	3
223.595	1	1	3
492.122	0	1	3
161.303	0	1	3
304.057	1	1	3
520.556	1	1	3
182.945	0	1	3
720.57	1	1	3
607.486	1	1	3
45.9799	1	1	3
451.677	1	1	3
7.65566	1	1	3
-21.4707	0	1	3
-99.9969	1	1	3
-99.9967	1	1	3
-99.977	1	1	3
-99.9895	1	1	3
-99.9964	0	1	3
-44.4	1	1	3
-6.99941	1	1	3
68.5251	1	1	3
-89.2764	1	1	3
49.2963	1	1	3
-89.1825	1	1	3
-51.5828	1	1	3
-63.7713	0	1	3
-62.0017	0	1	3
153.038	1	1	3
-49.6063	0	1	3
-11.301	1	1	3
210.525	1	1	3
85.2172	1	1	3
-20.6719	1	1	3
96.893	1	1	3
21.8127	1	1	3
132.327	1	1	3
228.161	0	1	3
125.953	0	1	3
-25.5199	1	1	3
48.8857	0	1	3
-47.7673	1	1	3
-41.3641	1	1	3
0.70734	1	1	3
-73.165	0	1	3
64.877	0	1	3
-20.2997	0	1	3
-5.34928	1	1	3
-35.5944	1	1	3
-29.6605	1	1	3
-36.2715	1	1	3
23.2981	1	1	3
-71.6195	0	1	3
-75.7141	1	1	3
-25.6011	1	1	3
-80.6181	1	1	3
1458.81	1	1	3
1500.98	1	1	3
795.448	1	1	3
881.263	1	1	3
2081.43	1	1	3
984.965	0	1	3
1267.05	1	1	3
942.624	1	1	3
2290.72	1	1	3
1659.89	1	1	3
488.732	0	1	3
1246.62	0	1	3
3567.33	1	1	3
1439.48	1	1	3
1203.92	1	1	3
1094.04	1	1	3
865.165	1	1	3
560.854	1	1	3
673.347	0	1	3
476.054	0	1	3
1010.85	1	1	3
2199.89	1	1	3
1081.77	0	1	3
2259.48	1	1	3
4322.89	1	1	3
824.102	1	1	3
1277.83	0	1	3
2299.95	0	1	3
1050.33	0	1	3
809.031	0	1	3
768.041	1	1	3
2727.42	0	1	3
927.574	1	1	3
892.261	0	1	3
1435.59	0	1	3
389.946	1	1	3
900.649	1	1	3
1208.66	1	1	3
725.156	0	1	3
1276.82	1	1	3
956.512	1	1	3
822.57	0	1	3
517.817	0	1	3
753.981	1	1	3
1006.89	0	1	3
193.04	1	1	3
392.804	1	1	3
227.588	1	1	3
325.15	1	1	3
345.275	1	1	3
184.347	1	1	3
631.377	1	1	3
170.441	1	1	3
244.228	0	1	3
604.058	1	1	3
535.569	0	1	3
221.027	1	1	3
450.116	1	1	3
101.522	1	1	3
383.112	1	1	3
401.993	1	1	3
270.859	0	1	3
447.864	1	1	3
-26.1533	0	1	3
77.2797	1	1	3
900.155	1	1	3
513.762	0	1	3
623.323	0	1	3
1.08417	1	1	3
-34.7576	1	1	3
-41.3436	0	1	3
44.5975	1	1	3
1601.03	0	1	3
256.021	1	1	3
-29.8858	1	1	3
334.874	1	1	3
52.2	1	1	3
223.574	0	1	3
47.6072	1	1	3
216.976	1	1	3
94.7254	0	1	3
530.159	1	1	3
50.5531	1	1	3
240.103	1	1	3
1491.31	1	1	3
2081.64	1	1	3
2712.17	0	1	3
1013.2	1	1	3
708.827	0	1	3
1510.61	1	1	3
2095.53	1	1	3
1830.61	1	1	3
1235	1	1	3
1446.5	0	1	3
1642.05	1	1	3
1769.34	1	1	3
1819.78	0	1	3
1577.66	1	1	3
2542.67	1	1	3
2357.98	1	1	3
2767.72	1	1	3
2187.48	1	1	3
349.433	1	1	3
1574.84	1	1	3
3453.04	0	1	3
1483.05	1	1	3
1072.93	0	1	3
1876.46	1	1	3
2115.29	0	1	3
904.355	1	1	3
1025.17	0	1	3
3564.8	0	1	3
983.53	1	1	3
331.472	0	1	3
1624.06	0	1	3
1248.75	0	1	3
529.205	1	1	3
795.209	1	1	3
477.145	1	1	3
549.855	1	1	3
458.776	0	1	3
1591.2	0	1	3
877.369	0	1	3
789.484	0	1	3
267.524	0	1	3
590.028	0	1	3
380.45	0	1	3
657.895	1	1	3
309.988	1	1	3
89.651	0	1	3
456.706	1	1	3
856.191	0	1	3
806.122	1	1	3
676.332	0	1	3
621.262	1	1	3
276.197	1	1	3
465.749	1	1	3
835.052	1	1	3
1075.86	0	1	3
803.756	0	1	3
191.019	1	1	3
-70.6416	1	1	3
-12.9365	1	1	3
-20.033	1	1	3
90.1664	1	1	3
201.886	1	1	3
49.0105	1	1	3
134.703	1	1	3
104.622	1	1	3
217.633	1	1	3
48.9066	1	1	3
-1.20286	1	1	3
51.0578	1	1	3
121.224	0	1	3
188.262	1	1	3
-38.3828	1	1	3
176.514	1	1	3
467.739	1	1	3
22.8679	1	1	3
682.033	1	1	3
236.742	1	1	3
190.342	1	1	3
150.145	1	1	3
366.93	1	1	3
381.454	1	1	3
346.494	1	1	3
19.9142	1	1	3
[truncated: 221,233+ more rows]

## Sheet: Fig. S5a
FAF pre	FAF novoc	AC pre	AC novoc	freq_band			Frequency bands
9.65498	8.06944	0	0	1			1. delta
6.54522	6.89266	0	0	1			2. theta
6.33825	8.57472	0	0	1			3. alpha
8.86634	10.1486	0	0	1			4. beta1
5.474	5.61733	0	0	1			7. gamma2
8.3228	5.6719	0	0	1
9.55865	8.79482	0	0	1
7.37643	5.1058	0	0	1
5.67589	10.9606	0	0	1
5.1214	6.75832	0	0	1
3.89274	5.86252	0	0	1
6.14279	9.56628	0	0	1
7.51507	7.00808	0	0	1
6.00579	8.2365	0	0	1
6.48262	8.33455	0	0	1
8.33791	9.91911	0	0	1
7.41178	9.78946	0	0	1
9.4232	4.97703	0	0	1
3.39304	7.28535	0	0	1
6.52014	11.3497	0	0	1
4.72181	7.71509	0	0	1
8.95754	4.6734	0	0	1
7.81408	4.54091	0	0	1
3.85137	8.50946	0	0	1
6.58656	4.86094	0	0	1
9.18806	10.788	0	0	1
6.39412	6.05138	0	0	1
5.10114	9.23413	0	0	1
4.97748	8.25611	0	0	1
5.96187	8.00678	0	0	1
10.0022	5.5295	0	0	1
5.49132	9.23571	0	0	1
3.53079	6.88961	0	0	1
3.62822	7.37255	0	0	1
4.0986	8.46336	0	0	1
9.76699	6.73124	0	0	1
4.39092	6.96273	0	0	1
6.4459	12.1838	0	0	1
0.73191	13.301	0	0	1
6.94707	3.55191	0	0	1
13.2433	13.3059	0	0	1
1.92002	7.89726	0	0	1
6.86215	7.2776	0	0	1
4.36324	7.51462	0	0	1
4.617	10.5218	0	0	1
5.46018	4.71504	0	0	1
0.866621	8.57994	0	0	1
10.1243	8.43192	0	0	1
6.74826	8.94649	0	0	1
6.25576	7.22547	0	0	1
9.01484	8.75617	0	0	1
6.39495	1.63679	0	0	1
3.56237	5.93435	0	0	1
7.50919	9.81373	0	0	1
6.43314	6.95302	0	0	1
6.19781	7.65784	0	0	1
8.56001	4.15303	0	0	1
6.62073	11.3503	0	0	1
4.26751	6.09	0	0	1
1.38326	5.82589	0	0	1
6.30087	8.51004	0	0	1
6.12877	8.11487	0	0	1
5.32896	9.00359	0	0	1
4.15889	7.66895	0	0	1
8.1513	5.21795	0	0	1
2.42416	6.5632	0	0	1
0	9.72561	0.505336	0	1
6.36804	7.38276	0	0	1
6.00354	8.67188	0	0	1
5.94444	9.24666	0	0	1
0	7.43175	0.180329	0	1
6.08059	6.77847	0	0	1
4.21372	7.33523	0	0	1
4.94991	5.48433	0	0	1
6.16002	7.83951	0	0	1
5.62657	4.5121	0	0	1
4.75938	9.29119	0	0	1
1.77042	5.59489	0	0	1
5.90053	10.7548	0	0	1
4.79248	5.53146	0	0	1
7.6531	6.2689	0	0	1
4.93273	7.85978	0	0	1
8.64256	11.7032	0	0	1
6.7025	8.55342	0	0	1
10.5947	7.7327	0	0	1
6.05941	10.682	0	0	1
5.14248	2.57197	0	0	1
4.80694	7.37994	0	0	1
5.68474	11.2158	0	0	1
7.43547	9.09816	0	0	1
5.99277	6.84624	0	0	1
7.63021	8.43038	0	0	1
6.76289	9.21082	0	0	1
6.05962	7.06985	0	0	1
6.41766	6.36673	0	0	1
5.6872	10.7228	0	0	1
9.44361	6.83244	0	0	1
5.96207	4.6154	0	0	1
1.47804	6.71968	0	0	1
2.15662	6.42325	0	0	1
3.6037	8.16326	0	0	1
4.91865	7.0265	0	0	1
5.48399	9.51409	0	0	1
5.09153	6.90918	0	0	1
7.36308	14.2141	0	0	1
4.39536	7.03373	0	0	1
8.72866	10.4268	0	0	1
4.41289	8.15656	0	0	1
5.35061	5.88747	0	0	1
4.68975	9.06294	0	0	1
11.1405	8.11767	0	0	1
9.74558	6.83153	0	0	1
4.11102	8.72028	0	0	1
6.45632	9.06331	0	0	1
9.57646	9.19434	0	0	1
6.21199	10.7663	0	0	1
7.51603	10.8082	0	0	1
5.73416	9.06478	0	0	1
5.75013	6.1428	0	0	1
7.62795	10.5568	0	0	1
4.49949	6.43215	0	0	1
4.5722	8.9266	0	0	1
5.74086	9.78676	0	0	1
5.17801	11.4848	0	0	1
4.6738	9.19484	0	0	1
2.8389	3.22375	0	0	1
7.08807	6.81186	0	0	1
6.80149	8.37949	0	0	1
5.92217	5.78185	0	0	1
7.83888	7.40808	0	0	1
2.51839	9.78033	0	0	1
1.69335	7.01609	0	0	1
4.08674	7.47575	0	0	1
4.19637	7.3358	0	0	1
6.95396	8.31722	0	0	1
0.436101	7.08963	0	0	1
7.88112	10.6108	0	0	1
8.62982	5.11474	0	0	1
4.13298	7.576	0	0	1
4.46522	7.069	0	0	1
6.12911	6.6008	0	0	1
7.79533	9.08504	0	0	1
9.55857	7.57983	0	0	1
7.62827	7.46507	0	0	1
8.07943	7.79595	0	0	1
6.55079	7.98747	0	0	1
5.93564	5.29749	0	0	1
1.2272	9.23277	0	0	1
6.05634	7.69108	0	0	1
1.36061	5.02937	0	0	1
4.85111	6.51613	0	0	1
1.18616	9.26777	0	0	1
4.81188	9.40572	0	0	1
7.26066	8.384	0	0	1
6.17307	13.3338	0	0	1
2.02124	7.16691	0	0	1
7.4749	10.438	0	0	1
5.63151	9.49619	0	0	1
3.27801	5.91748	0	0	1
9.67873	0.166643	0	0.113129	1
7.1004	9.72997	0	0	1
5.81825	4.53003	0	0	1
5.64989	7.23849	0	0	1
7.99482	9.83642	0	0	1
6.13382	3.49275	0	0	1
8.30045	8.00487	0	0	1
4.84662	6.15703	0	0	1
9.44135	4.96131	0	0	1
4.35789	5.83887	0	0	1
6.8346	8.70021	0	0	1
4.14909	9.08147	0	0	1
7.22534	9.59308	0	0	1
3.51101	12.1686	0	0	1
5.47737	6.68888	0	0	1
5.82636	10.9402	0	0	1
7.55603	5.56535	0	0	1
7.36131	6.10825	0	0	1
7.87975	6.55034	0	0	1
6.41098	8.49971	0	0	1
3.86744	3.96455	0	0	1
4.61517	3.16954	0	0	1
6.72531	7.25873	0	0	1
4.76023	7.8133	0	0	1
3.09127	9.05766	0	0	1
7.1467	5.58525	0	0	1
4.62861	9.3004	0	0	1
9.00381	13.57	0	0	1
8.52642	3.37791	0	0	1
4.96684	6.50816	0	0	1
4.10253	11.9035	0	0	1
7.18241	7.45866	0	0	1
6.33716	9.30015	0	0	1
7.51236	10.9485	0	0	1
5.5527	3.96673	0	0	1
1.94185	7.42028	0	0	1
8.56161	11.0072	0	0	1
0.173631	5.50777	0.0501768	0	1
7.3136	5.20051	0	0	1
7.23298	8.01789	0	0	1
8.29448	13.0347	0	0	1
3.85824	7.00529	0	0	1
7.27151	8.67311	0	0	1
7.1677	8.3941	0	0	1
10.1491	9.89662	0	0	1
5.63618	1.99795	0	0	1
4.57242	6.18055	0	0	1
4.56419	8.82247	0	0	1
6.06065	5.85899	0	0	1
5.16566	13.6943	0	0	1
1.82235	10.0744	0	0	1
6.24324	8.26718	0	0	1
5.23318	12.0476	0	0	1
12.1394	11.8291	0	0	1
4.76357	8.53284	0	0	1
5.99352	5.27386	0	0	1
5.79011	6.84776	0	0	1
8.7668	2.93083	0	0	1
2.91249	13.4073	0	0	1
9.79507	10.123	0	0	1
5.8224	11.3717	0	0	1
2.42516	4.86294	0	0	1
1.56656	7.97887	0	0	1
7.58754	4.77521	0	0	1
9.75464	7.49349	0	0	1
7.26245	5.34498	0	0	1
2.97896	11.716	0	0	1
8.43549	7.31206	0	0	1
7.11966	6.53851	0	0	1
2.99636	10.1706	0	0	1
3.19104	11.0798	0	0	1
4.29444	9.59871	0	0	1
9.00529	6.94519	0	0	1
6.10347	9.08478	0	0	1
3.02775	6.04024	0	0	1
6.79067	7.34418	0	0	1
7.07522	10.4233	0	0	1
5.20192	8.52766	0	0	1
6.6156	8.36152	0	0	1
0.927155	2.96722	0	0	1
3.49091	7.86169	0	0	1
7.37505	7.52946	0	0	1
9.74631	4.64743	0	0	1
8.82121	6.29729	0	0	1
3.69732	11.865	0	0	1
3.98045	13.1643	0	0	1
2.92047	8.5388	0	0	1
8.34924	6.94202	0	0	1
6.92278	7.25162	0	0	1
6.97633	5.6758	0	0	1
7.61238	9.18189	0	0	1
5.96244	5.13759	0	0	1
4.7071	7.90414	0	0	1
6.1934	7.82881	0	0	1
5.87857	10.9464	0	0	1
4.58128	6.55651	0	0	1
3.40791	6.02407	0	0	1
8.23291	8.35481	0	0	1
4.91157	10.4799	0	0	1
3.57089	9.99847	0	0	1
6.99822	9.79641	0	0	1
2.86894	2.18008	0	0	1
6.27387	8.64581	0	0	1
8.7113	9.07284	0	0	1
8.49992	3.76924	0	0	1
4.43806	9.49317	0	0	1
5.2309	5.54629	0	0	1
5.19779	10.9753	0	0	1
4.92796	9.19135	0	0	1
2.98784	3.09063	0	0	1
7.09267	6.46821	0	0	1
5.08243	8.80241	0	0	1
6.2832	6.45989	0	0	1
8.0157	7.76727	0	0	1
1.98846	10.8257	0	0	1
9.26829	5.93188	0	0	1
7.32482	10.3458	0	0	1
2.52586	7.22178	0	0	1
5.75416	6.31942	0	0	1
7.87084	8.63406	0	0	1
6.70142	7.3712	0	0	1
6.58764	9.18758	0	0	1
9.08501	7.19984	0	0	1
4.0923	12.4425	0	0	1
5.08578	7.55719	0	0	1
7.37072	3.27784	0	0	1
4.85135	9.06979	0	0	1
3.81049	9.0241	0	0	1
5.68826	9.64921	0	0	1
6.90531	7.07488	0	0	1
4.91572	6.76964	0	0	1
9.25057	5.89365	0	0	1
5.46108	12.1973	0	0	1
6.34174	7.03076	0	0	1
6.58766	6.33692	0	0	1
8.29727	6.35225	0	0	1
5.45229	2.53639	0	0	1
6.18557	11.6723	0	0	1
4.91534	6.03742	0	0	1
3.36748	9.55321	0	0	1
8.51515	10.4796	0	0	1
4.01053	9.00371	0	0	1
4.31644	3.60898	0	0	1
7.89866	10.3279	0	0	1
5.9088	5.4523	0	0	1
3.4073	9.8651	0	0	1
11.5809	4.02345	0	0	1
7.0809	6.08177	0	0	1
11.6796	6.53967	0	0	1
6.80832	8.06956	0	0	1
7.19104	12.8269	0	0	1
2.38273	3.91795	0	0	1
7.08689	9.81877	0	0	1
7.09757	3.27872	0	0	1
6.89663	4.54255	0	0	1
6.51603	11.0001	0	0	1
1.44684	3.8493	0	0	1
5.21501	8.04135	0	0	1
6.26114	7.83106	0	0	1
1.74964	5.21592	0	0	1
7.44484	11.6804	0	0	1
11.2121	8.57864	0	0	1
2.88965	10.5861	0	0	1
7.59946	4.78597	0	0	1
4.25765	12.8728	0	0	1
9.95259	5.94207	0	0	1
7.4147	8.80114	0	0	1
5.40871	7.43789	0	0	1
7.98919	7.50207	0	0	1
3.05016	7.34983	0	0	1
8.79457	6.09107	0	0	1
1.39579	9.55095	0	0	1
5.39364	10.0941	0	0	1
6.01119	8.30274	0	0	1
5.3673	8.83103	0	0	1
6.60166	6.13085	0	0	1
8.47998	4.92989	0	0	1
4.56788	12.2493	0	0	1
9.01743	9.41871	0	0	1
5.91086	9.177	0	0	1
8.32547	7.7143	0	0	1
1.91909	10.8327	0	0	1
8.56729	7.35443	0	0	1
0.409895	3.67173	0	0	1
0.536101	3.79578	0	0	1
4.50532	6.81795	0	0	1
3.87473	7.0322	0	0	1
7.15726	8.85571	0	0	1
6.06948	10.0732	0	0	1
6.96134	5.56189	0	0	1
4.22422	4.22834	0	0	1
2.80777	7.77124	0	0	1
12.1798	10.6732	0	0	1
5.64681	9.04159	0	0	1
5.19993	10.371	0	0	1
4.27302	7.34171	0	0	1
3.92872	7.83419	0	0	1
5.12225	6.61468	0	0	1
1.50408	5.60638	0	0	1
6.92859	9.27243	0	0	1
3.41552	9.99153	0	0	1
10.5828	9.18096	0	0	1
3.38253	3.67647	0	0	1
3.18526	5.21439	0	0	1
3.29288	7.71503	0	0	1
4.68149	5.98897	0	0	1
7.6336	11.6434	0	0	1
8.0064	4.48237	0	0	1
2.99385	11.0479	0	0	1
7.80425	9.66634	0	0	1
5.71571	8.15218	0	0	1
7.80258	6.10484	0	0	1
7.21964	7.39573	0	0	1
6.12472	7.22096	0	0	1
7.75866	3.14914	0	0	1
6.89611	11.1827	0	0	1
6.59942	8.88278	0	0	1
5.73737	3.81623	0	0	1
0.878464	7.23889	0	0	1
7.36195	12.7865	0	0	1
5.4288	6.8323	0	0	1
5.83716	6.84749	0	0	1
3.43003	7.12082	0	0	1
7.47051	9.73341	0	0	1
4.19322	5.59358	0	0	1
9.44554	8.70563	0	0	1
9.05841	9.12873	0	0	1
5.95056	2.77474	0	0	1
13.3443	7.85654	0	0	1
4.67594	6.26196	0	0	1
6.82425	9.34966	0	0	1
8.28493	6.06833	0	0	1
5.57346	8.13025	0	0	1
7.09025	6.19677	0	0	1
7.76539	7.2434	0	0	1
6.04277	6.20777	0	0	1
8.28571	5.43467	0	0	1
5.3183	7.40966	0	0	1
0	11.8808	0.0621569	0	1
5.55398	9.91691	0	0	1
5.29661	4.22758	0	0	1
4.50423	7.32862	0	0	1
4.71229	8.08454	0	0	1
4.20909	8.74193	0	0	1
7.28473	7.04743	0	0	1
6.61826	9.87745	0	0	1
4.31955	6.90316	0	0	1
3.97338	7.49811	0	0	1
1.79734	7.49647	0	0	1
8.51841	4.77677	0	0	1
3.6392	3.72991	0	0	1
2.9837	6.19085	0	0	1
8.17599	12.529	0	0	1
5.53456	9.70189	0	0	1
7.9676	7.21245	0	0	1
6.78668	3.20405	0	0	1
9.41256	7.54223	0	0	1
2.42459	11.3344	0	0	1
3.70156	4.89316	0	0	1
7.01962	8.67226	0	0	1
6.00524	7.77805	0	0	1
5.51116	4.5864	0	0	1
3.80096	8.17599	0	0	1
5.0392	7.80213	0	0	1
9.07306	11.2154	0	0	1
4.92459	8.97387	0	0	1
2.54939	5.08825	0	0	1
4.26712	1.565	0	0	1
8.78141	6.61058	0	0	1
5.00585	9.48222	0	0	1
5.66955	5.79303	0	0	1
5.4586	6.42029	0	0	1
4.24051	9.1722	0	0	1
6.88557	3.66994	0	0	1
5.06487	5.14178	0	0	1
7.34118	4.83626	0	0	1
5.85287	9.82783	0	0	1
7.00748	10.5926	0	0	1
9.12014	7.12894	0	0	1
6.52907	10.0094	0	0	1
5.23195	7.5778	0	0	1
5.86041	8.27909	0	0	1
7.57987	6.2758	0	0	1
9.43598	7.19512	0	0	1
4.60656	6.72789	0	0	1
4.47709	11.1756	0	0	1
6.30052	9.9982	0	0	1
5.0399	5.18655	0	0	1
7.49757	4.42365	0	0	1
5.67587	6.88107	0	0	1
4.46338	5.2664	0	0	1
2.66749	11.1556	0	0	1
6.47303	4.35838	0	0	1
10.2501	6.95786	0	0	1
7.33679	5.3232	0	0	1
7.78771	11.4095	0	0	1
4.87359	6.53847	0	0	1
1.00715	9.04537	0	0	1
7.32271	7.67067	0	0	1
7.61975	7.00404	0	0	1
5.13821	5.46685	0	0	1
6.6717	7.74777	0	0	1
3.06277	8.639	0	0	1
5.16161	11.0385	0	0	1
5.91251	10.239	0	0	1
6.91939	10.7955	0	0	1
8.27452	7.05927	0	0	1
3.99708	7.74624	0	0	1
6.9533	4.59754	0	0	1
9.01362	7.89848	0	0	1
5.66974	7.82445	0	0	1
9.42103	10.5322	0	0	1
4.47187	3.75707	0	0	1
6.79411	8.35405	0	0	1
6.405	6.69311	0	0	1
3.95648	4.92502	0	0	1
6.61515	12.2498	0	0	1
6.65405	11.3184	0	0	1
5.40334	7.47998	0	0	1
5.32152	8.98539	0	0	1
8.07732	10.0492	0	0	1
5.79043	6.16938	0	0	1
6.56306	4.94165	0	0	1
5.03562	4.2265	0	0	1
4.52033	3.99934	0	0	1
5.82941	8.31792	0	0	1
7.51954	10.6252	0	0	1
8.07806	6.68345	0	0	1
5.06355	7.37978	0	0	1
4.75825	3.49154	0	0	1
2.18233	4.70957	0	0	1
8.31197	9.39747	0	0	1
7.22226	5.80675	0	0	1
4.4717	8.98893	0	0	1
5.82368	7.71835	0	0	1
8.03112	11.938	0	0	1
5.16319	7.00063	0	0	1
5.6717	12.6614	0	0	1
5.80332	9.58148	0	0	1
6.64066	4.35939	0	0	1
8.35171	6.71874	0	0	1
4.84646	0.455338	0	0	2
2.0795	0	0	0.456531	2
3.93489	2.3577	0	0	2
1.93943	1.78942	0	0	2
0	1.34222	0.683469	0	2
0	1.32448	0.227871	0	2
6.74099	3.82377	0	0	2
2.43186	0	0	0.602726	2
2.06183	0	0	0.563703	2
3.09679	0	0	0.552994	2
3.61495	2.98507	0	0	2
4.42836	0	0	0.232297	2
3.71494	0	0	1.75236	2
3.02771	4.47845	0	0	2
0.826029	0.262826	0	0	2
1.1513	2.41721	0	0	2
2.95504	0	0	1.86433	2
1.59595	1.26758	0	0	2
3.59755	2.70127	0	0	2
0	1.61013	0.45632	0	2
3.15834	0	0	0.359188	2
2.13377	1.13718	0	0	2
2.10009	1.16624	0	0	2
4.65897	2.95041	0	0	2
3.14124	0	0	1.03319	2
1.39041	5.09986	0	0	2
2.48861	0	0	0.272441	2
1.28421	2.78459	0	0	2
2.72426	0	0	2.57901	2
0.454897	1.02625	0	0	2
3.19945	0	0	0.821899	2
2.39916	1.23965	0	0	2
1.61613	4.3533	0	0	2
0.821364	0.937896	0	0	2
2.74636	0.927375	0	0	2
3.6755	0	0	2.16585	2
2.28523	2.97099	0	0	2
3.0211	3.88747	0	0	2
4.43864	1.96228	0	0	2
1.23586	6.6567	0	0	2
0.0289519	3.40243	0.0417833	0	2
2.51341	3.61941	0	0	2
4.95612	0	0	0.092976	2
2.09738	6.57517	0	0	2
0	2.45484	0.439497	0	2
0.757861	1.07589	0	0	2
2.58542	0	0	1.13318	2
1.07652	3.26897	0	0	2
1.6743	3.33534	0	0	2
6.10887	4.38669	0	0	2
4.29693	3.10405	0	0	2
1.96418	2.06532	0	0	2
0.729681	2.83794	0	0	2
5.0217	0	0	1.02437	2
2.10173	2.38407	0	0	2
0.810011	0	0	0.343229	2
2.46791	1.12985	0	0	2
3.3195	3.23159	0	0	2
0	1.30613	2.53668	0	2
3.58754	0	0	0.724456	2
2.95228	3.94418	0	0	2
1.75706	1.98983	0	0	2
0	0	1.46692	0.856863	2
1.25185	5.42136	0	0	2
4.66588	4.03024	0	0	2
0	3.0723	1.91688	0	2
3.21645	0.136447	0	0	2
1.95526	0.709167	0	0	2
2.76558	0	0	0.340791	2
3.50664	4.35394	0	0	2
1.87934	2.70512	0	0	2
2.28461	3.73137	0	0	2
1.16071	3.25336	0	0	2
3.16911	1.89569	0	0	2
4.26029	1.69312	0	0	2
2.50053	0	0	1.65813	2
0.816449	0.185827	0	0	2
1.27005	1.58645	0	0	2
1.34289	2.76404	0	0	2
4.12738	0	0	1.66545	2
3.52939	2.74277	0	0	2
3.13439	3.66282	0	0	2
3.40807	3.93246	0	0	2
5.72456	1.84832	0	0	2
0	0.0574482	3.102	0.0158776	2
3.76835	4.34075	0	0	2
4.12961	4.29958	0	0	2
3.73588	1.37874	0	0	2
0	2.61916	1.32992	0	2
0	4.4688	0.132155	0	2
3.54913	3.81947	0	0	2
5.95794	0.92985	0	0	2
5.84294	2.51089	0	0	2
1.39824	0	0	0.252448	2
3.36032	0	0	0.608784	2
3.59885	1.18818	0	0	2
1.72748	3.11319	0	0	2
0	0	2.60877	1.41599	2
4.86995	4.08079	0	0	2
2.41872	0	0	0.791737	2
5.25992	2.30551	0	0	2
6.6909	0	0	1.75793	2
3.3138	1.5238	0	0	2
0	0.998756	1.71509	0	2
4.28373	0.970124	0	0	2
0.0438759	0.659966	0.0485071	0	2
2.7205	2.25283	0	0	2
2.10888	0.480859	0	0	2
2.82207	7.83003	0	0	2
4.61037	0.106886	0	0.0370429	2
0.187119	1.74318	0	0	2
0	3.93261	0.621576	0	2
5.93035	1.43991	0	0	2
0	5.46334	1.09066	0	2
4.69029	2.04741	0	0	2
5.94957	1.57063	0	0	2
2.42691	1.83108	0	0	2
0.549433	2.44444	0	0	2
4.6895	1.85419	0	0	2
0	4.80909	2.15955	0	2
4.62755	0	0	0.949397	2
2.22213	4.18725	0	0	2
3.16271	0	0	0.990431	2
0.455974	0	0	1.74591	2
7.08062	2.64531	0	0	2
2.6546	0.157	0	0	2
1.78088	3.02081	0	0	2
6.15463	2.61902	0	0	2
1.1604	1.64393	0	0	2
2.86035	2.3077	0	0	2
2.65184	0.0970219	0	0	2
3.32573	0.570676	0	0	2
6.26153	0	0	2.55381	2
1.39528	0.716352	0	0	2
5.20476	0.867311	0	0	2
0.995399	4.45258	0	0	2
0.714783	5.17145	0	0	2
0.336481	3.72977	0	0	2
5.80057	1.06085	0	0	2
5.10412	0	0	0.487608	2
0.66664	3.99927	0	0	2
1.72774	3.79625	0	0	2
2.44907	7.10323	0	0	2
7.37944	6.25148	0	0	2
5.02792	1.92882	0	0	2
3.24507	3.31803	0	0	2
2.03525	4.49445	0	0	2
0.390494	4.16237	0	0	2
1.82838	5.92676	0	0	2
1.81861	3.23086	0	0	2
2.54967	4.49991	0	0	2
0	0.0121101	0.36985	0.0142625	2
1.29084	5.04444	0	0	2
5.41652	2.1962	0	0	2
0.254018	2.2637	0	0	2
2.99843	1.93507	0	0	2
3.61772	2.04457	0	0	2
4.13887	2.14218	0	0	2
0.788338	1.62473	0	0	2
0	1.88437	1.13193	0	2
0.0390094	4.74592	0.0103025	0	2
1.65031	5.88722	0	0	2
0	3.64747	2.11028	0	2
1.69791	5.25345	0	0	2
1.54196	2.13692	0	0	2
0.990053	5.11108	0	0	2
3.7166	3.38787	0	0	2
3.04328	2.49723	0	0	2
0.944427	2.84284	0	0	2
0.838127	0	0	2.05836	2
3.78934	4.27255	0	0	2
2.81502	0.785547	0	0	2
1.59562	6.20187	0	0	2
0	0	0.996356	4.07582	2
5.8225	8.11474	0	0	2
1.90501	2.30846	0	0	2
2.93522	2.73115	0	0	2
3.65157	2.72927	0	0	2
2.26314	5.00568	0	0	2
2.03399	2.36593	0	0	2
0.666871	0	0	0.72606	2
0	0	0.0584633	5.04755	2
0.50236	0	0	0.427102	2
1.96644	0.763283	0	0	2
3.75776	4.57079	0	0	2
4.74501	1.59616	0	0	2
1.82663	2.13035	0	0	2
2.72342	0.0632079	0	0	2
0.91227	4.90093	0	0	2
2.20595	3.27457	0	0	2
1.99424	0.62457	0	0	2
3.64952	3.45745	0	0	2
4.70603	1.66453	0	0	2
3.02479	4.62148	0	0	2
0	0	1.23088	0.847274	2
1.22838	6.79776	0	0	2
3.06575	3.88039	0	0	2
2.99236	0	0	0.366187	2
1.7925	0.471564	0	0	2
0	7.53435	1.04815	0	2
2.85527	1.94451	0	0	2
0	4.55535	0.662062	0	2
0	0.856392	0.45568	0	2
0.255946	0.022997	0	0.261472	2
2.15201	0.209098	0	0.0181049	2
4.3901	1.86429	0	0	2
2.26445	1.41059	0	0	2
4.48696	3.23254	0	0	2
3.941	2.81723	0	0	2
3.97493	5.01669	0	0	2
3.53767	3.95627	0	0	2
1.11161	5.54799	0	0	2
1.64718	6.18878	0	0	2
1.72534	2.38494	0	0	2
1.0989	5.48542	0	0	2
2.56393	1.07172	0	0	2
5.51203	0	0	1.96736	2
2.96051	2.38841	0	0	2
2.08899	0.412521	0	0	2
3.13109	4.16687	0	0	2
3.36035	0.28775	0	0	2
0	3.14634	1.93837	0	2
2.3495	0	0	1.07231	2
3.44396	4.20804	0	0	2
4.293	3.41343	0	0	2
3.99632	3.89394	0	0	2
1.33627	0.568001	0	0	2
0.563056	0.383451	0	0	2
0	0.832847	1.54581	0	2
5.84075	4.88492	0	0	2
2.5144	0	0	1.47878	2
4.71824	2.40855	0	0	2
5.13683	2.27175	0	0	2
3.05187	0	0	1.16129	2
3.76079	2.95403	0	0	2
4.18519	0	0	1.28907	2
1.24187	4.72953	0	0	2
2.56807	0.364935	0	0.164902	2
1.66192	0	0	3.92073	2
0.0183468	3.04845	0.193675	0	2
4.13796	6.32921	0	0	2
6.90846	5.59187	0	0	2
2.44885	2.16317	0	0	2
0.617335	1.01458	0	0	2
4.3342	0.707958	0	0	2
7.1012	0	0	0.81779	2
2.0611	2.74936	0	0	2
2.15556	4.90518	0	0	2
2.50128	0	0	0.205028	2
0.556197	0.29658	0.264578	0	2
1.96805	1.95193	0	0	2
4.01934	0.835937	0	0	2
0.481499	0	1.05396	3.52117	2
4.41317	6.2782	0	0	2
1.8346	0.63297	0	0	2
0.296771	0	0	0.495076	2
3.72085	1.31178	0	0	2
0	0.0540696	0.488173	0	2
2.69782	0	0	1.75245	2
2.0172	0.662721	0	0	2
3.03246	0	0	0.619255	2
2.63097	3.49546	0	0	2
3.93899	0	0	0.896521	2
5.12239	2.97395	0	0	2
2.37418	1.63236	0	0	2
0	0	1.21933	1.52014	2
0.615557	0	0	1.05821	2
2.57057	5.02811	0	0	2
0.0283958	3.00247	0	0	2
3.65257	2.11994	0	0	2
4.0525	0.263596	0	0	2
0	2.62806	0.334003	0	2
2.25588	0.689007	0	0	2
3.02117	0	0	0.937446	2
3.41798	1.33818	0	0	2
0.214381	3.45615	0.135569	0	2
0.764464	5.46961	0	0	2
0.640164	3.58911	0.214065	0	2
3.63715	1.48506	0	0	2
3.12908	0	0	0.232028	2
3.23574	4.45159	0	0	2
1.84983	2.35677	0	0	2
1.67923	2.81642	0	0	2
4.39058	0	0	1.12324	2
1.94579	0.213292	0	0	2
2.24682	1.72318	0	0	2
4.85134	4.26626	0	0	2
2.95243	5.48679	0	0	2
0	2.68761	1.30008	0	2
1.76126	1.48409	0	0	2
1.99488	6.08143	0	0	2
0.699044	0	0	0.572362	2
6.87622	0	0	0.91104	2
4.14301	3.03494	0	0	2
3.47702	0.00427091	0	0.347627	2
2.89827	7.17832	0	0	2
1.60876	1.36291	0	0	2
5.41716	8.40038	0	0	2
4.88064	0.460742	0	0	2
3.91382	0.756499	0	0	2
0	0.811472	2.43415	0	2
3.55164	4.38352	0	0	2
3.44038	3.87951	0	0	2
0.766549	1.91505	0	0	2
1.19766	4.93941	0	0	2
0.71469	0	0	0.17047	2
1.35803	2.27432	0	0	2
1.47673	5.07791	0	0	2
4.44171	4.1938	0	0	2
0.94882	3.99778	0	0	2
4.2686	0	0	0.322849	2
5.0077	3.91405	0	0	2
1.4557	3.12733	0	0	2
0.0932103	4.93075	0.357532	0	2
1.55564	4.05148	0	0	2
1.2667	0	0	0.462907	2
1.55548	1.73196	0	0	2
1.75724	0.135956	0	0.0988529	2
1.12237	1.39288	0	0	2
4.71073	0.139538	0	0	2
2.29042	5.77048	0	0	2
5.68052	4.9459	0	0	2
1.94902	0.151462	0	0	2
6.35363	3.28052	0	0	2
4.95192	3.07957	0	0	2
1.80848	0.489742	0	0	2
3.03543	3.85687	0	0	2
0	4.72072	0.667536	0	2
2.87854	4.38832	0	0	2
0	2.25558	1.4165	0	2
3.8738	1.35083	0	0	2
2.3264	0	0	0.428422	2
3.64418	0	0	2.06922	2
4.23059	4.43895	0	0	2
4.86896	0	0	0.205394	2
2.83828	0.0110715	0	0.0250251	2
1.89629	0	0	0.620799	2
4.64859	0.672394	0	0	2
3.75688	0	0	0.586896	2
1.3747	3.31068	0	0	2
1.0379	3.51592	0	0	2
5.35872	0.0416024	0	0.548734	2
1.85244	0	0	2.03441	2
2.58769	2.53823	0	0	2
1.42443	0.961201	0	0	2
2.90636	1.78834	0	0	2
0.631238	4.22186	0	0	2
3.33853	3.78352	0	0	2
7.58425	2.2422	0	0	2
2.88596	0	0	2.91377	2
4.17327	3.08672	0	0	2
0	0	1.60724	0.42704	2
4.05025	0.365903	0	0	2
1.6833	7.97178	0	0	2
4.74241	1.14852	0	0	2
4.18902	0.750313	0	0	2
0.622265	1.60908	0	0	2
2.01646	1.24003	0	0	2
2.87414	3.15612	0	0	2
4.62422	0.650388	0	0	2
1.71903	1.795	0	0	2
4.0081	0.393556	0	0	2
1.60906	0.198821	0	0	2
1.64575	4.02949	0	0	2
2.09693	0.00595796	0	0.0674405	2
0.404414	2.51285	0	0	2
0.843936	3.67554	0	0	2
4.02927	5.26307	0	0	2
3.22882	0.790247	0	0	2
3.32711	0	0	0.544652	2
3.0207	2.5973	0	0	2
0	0.607242	1.21738	0	2
0.77	0	0	3.59238	2
1.88917	4.15116	0	0	2
3.09191	1.78126	0	0	2
3.71444	1.74612	0	0	2
4.41177	1.68876	0	0	2
3.17278	1.20256	0	0	2
2.08632	2.62909	0	0	2
2.88085	1.93499	0	0	2
0.679671	1.84323	0	0	2
4.93888	6.31915	0	0	2
0	2.52055	1.41822	0	2
0.274546	6.81056	0.118067	0	2
1.40438	4.59405	0	0	2
0	2.15849	0.39925	0	2
0	0	2.16017	1.4667	2
2.95492	4.26823	0	0	2
4.04248	0.66069	0	0	2
1.97498	2.15855	0	0	2
1.15319	3.26414	0	0	2
5.76414	3.44045	0	0	2
1.91552	0.242537	0	0.436803	2
4.35742	4.36073	0	0	2
0.863655	1.34603	0	0	2
1.51757	0	0	0.490217	2
3.06008	4.25075	0	0	2
0.463029	3.09055	0	0	2
5.96815	3.37624	0	0	2
1.40526	3.20691	0	0	2
0	0	0.985997	0.186265	2
1.3345	4.12713	0	0	2
2.82131	6.09795	0	0	2
6.97395	0	0	0.195865	2
2.55592	0.405218	0	0	2
1.8156	0	0	0.418709	2
5.41745	0	0	0.302449	2
7.02932	5.96375	0	0	2
2.44477	3.07951	0	0	2
3.2084	4.28983	0	0	2
4.03761	1.62654	0	0	2
2.60475	4.55379	0	0	2
0	0	1.27774	1.21943	2
0.586074	3.10261	0	0	2
0	6.06177	1.39837	0	2
3.68051	4.74437	0	0	2
3.43108	0.180811	0	0	2
2.55231	0.532085	0	0	2
0.190468	6.04382	0.150927	0	2
5.94496	0.223491	0	0	2
2.84445	4.13276	0	0	2
4.026	1.61583	0	0	2
0.201567	3.9756	0	0	2
4.58797	1.66961	0	0	2
1.27882	0.906287	0	0	2
2.63529	0	0	1.31745	2
3.57403	0	0	2.30753	2
0	0	2.15889	0.708364	2
3.23493	0	0	0.62855	2
1.07634	2.57857	0	0	2
5.03509	0.290657	0	0.421178	2
2.51419	2.4405	0	0	2
1.51209	0.74168	0	0	2
2.23847	0	0	3.1858	2
1.74086	0.384301	0	0	2
4.65447	0	0	2.6362	2
3.31329	5.18051	0	0	2
6.39422	0	0	0.54533	2
0	1.74212	0.211233	0	2
2.21002	0	0	0.539306	2
1.08389	2.96528	0	0	2
8.28539	3.3826	0	0	2
2.9371	0	0	1.51244	2
3.32687	1.87592	0	0	2
5.35776	1.90148	0	0	2
5.02511	3.5223	0	0	2
0	0.639741	0.438311	0	2
1.5086	2.64879	0	0	2
4.87487	1.75957	0	0	2
2.29323	1.81369	0	0	2
1.12103	0.702889	0	0	2
3.33975	2.57337	0	0	2
2.78187	4.19305	0	0	2
4.63814	2.9944	0	0	2
2.03597	3.08202	0	0	2
0	1.98904	3.12467	0	2
2.69683	0	0	1.71547	2
0.827569	2.27154	0	0	2
2.7141	3.97611	0	0	2
2.32451	0	0	0.349175	2
1.87741	2.39201	0	0	2
0.643837	6.18721	0	0	2
2.53338	6.47726	0	0	2
0	1.68003	1.96368	0	2
2.09629	1.92614	0	0	2
0.0210133	5.3881	0.084915	0	2
4.87733	0.585992	0	0	2
7.78667	3.9467	0	0	2
0	2.21078	1.61893	0	2
2.55226	3.40074	0	0	2
3.19688	0.521173	0	0	2
5.45608	0.98321	0	0	2
2.55006	4.08884	0	0	2
3.04428	4.77668	0	0	2
0.133485	0.607204	0	0.16687	2
3.96403	5.2319	0	0	2
0.76595	0.940827	0	0.122825	2
3.2517	2.01678	0	0	2
1.31365	1.97994	0	0	2
2.46112	1.56472	0	0	2
1.97335	1.1727	0	0	2
2.3556	2.21583	0	0	2
2.72815	1.31809	0	0	2
0	0.0428542	0.798675	0	2
2.04167	1.5979	0	0	2
2.44019	0.700186	0	0	2
3.53712	3.83599	0	0	2
3.25322	4.01368	0	0	2
1.81411	1.20302	0	0	2
1.04615	0	0	0.456109	2
5.43001	1.32048	0	0	2
4.09918	3.37562	0	0	2
1.99166	1.74795	0	0	2
3.39239	0	0	0.816223	2
5.72161	0.652368	0	0	2
0	1.30721	0.428862	0	2
4.03659	4.69925	0	0	2
0.849714	5.51909	0	0	2
4.03815	0	0	0.87405	2
4.28697	0	0	2.36953	2
0.331099	2.69743	0.0215019	0	3
0	2.82103	0.506748	0	3
0	0.368028	0.19057	0	3
1.85467	0	0	2.86714	3
5.73832	0	0	1.08195	3
1.78062	1.23589	0	0	3
1.05595	0	0	1.98516	3
3.7352	1.06259	0	0	3
0	0	1.53242	2.97649	3
1.30627	0	0	4.79891	3
1.31802	0.4497	0	0	3
2.72199	2.37898	0	0	3
0.92681	2.11726	0	0	3
0.500408	3.14409	0	0	3
0.000136036	0	0.0472159	3.78492	3
0	0.55755	1.45929	0.158695	3
0	2.11546	0.166896	0	3
1.26873	2.48799	0	0	3
0	0	1.64705	3.69282	3
3.191	0.839873	0	0	3
2.63729	0	0	0.479066	3
0	0.20813	0.964415	0	3
4.08698	0	0	3.7475	3
1.64998	0.978769	0	0	3
1.82402	0.0522714	0	0	3
2.25356	4.31247	0	0	3
0.331261	0	0	5.38964	3
0.791732	0	0	1.6442	3
0.41886	2.01267	0	0	3
0	0	1.94951	3.19249	3
0.391521	0	0	1.99228	3
0.124476	0.827987	0	0	3
3.46107	0	0	0.605503	3
1.2594	0	0	0.934683	3
0	1.66275	1.34479	0	3
1.07367	0	0	1.92966	3
0	0	2.5574	4.84349	3
1.02676	2.2692	0	0	3
0	4.37642	0.336889	0	3
1.62099	3.05654	0	0	3
0	0	2.0099	2.7635	3
3.25676	0	0	2.18293	3
2.25891	0	0	1.05299	3
0.732647	0.63541	0	0	3
0.594658	0	0	2.00083	3
4.35934	3.98656	0	0	3
0.12022	0.324585	0	0.209209	3
0.148296	0.426508	0	0.181604	3
0	0	0.442355	1.64123	3
0.606241	4.07282	0	0	3
0.197569	0	0.155733	2.55132	3
0.606475	0	0	0.376165	3
0	0	0.259639	0.911409	3
0	0	1.76713	3.8476	3
4.2252	0	0	2.741	3
0.899456	3.85415	0	0	3
1.72522	5.30833	0	0	3
0	0.597632	0.481951	0	3
1.128	1.62838	0	0	3
6.05088	0	0	2.77903	3
0	2.36459	1.50767	0	3
0	0	1.68182	0.379982	3
2.67525	1.02889	0	0	3
3.50852	0	0	1.91736	3
6.31738	2.90393	0	0	3
0	1.21943	3.73318	0	3
0	4.42014	1.36242	0	3
0	1.67501	0.524374	0	3
1.7913	4.3656	0	0	3
0.555339	2.13293	0	0	3
2.14761	0	0	1.97565	3
2.67128	5.5138	0	0	3
0	3.21428	1.77863	0	3
0	0	1.03496	2.33979	3
2.45824	2.96295	0	0	3
1.16079	0	0	0.918014	3
0	4.10302	1.96238	0	3
0	0	0.383572	3.91819	3
0	3.29732	2.31574	0	3
0	0.494245	3.57532	0	3
0	0.196095	0.959281	0	3
1.23545	2.63753	0	0	3
3.11451	0	0	2.71667	3
0	2.43392	0.213749	0	3
1.02231	3.80548	0	0	3
0	0	4.32685	0.755146	3
3.30889	0	0	0.488238	3
2.48655	1.79501	0	0	3
0	0.577476	4.15225	0	3
0	0	0.596776	1.48046	3
0.582551	0	0	1.14937	3
0	0	2.35535	0.683232	3
0.554358	0	0	1.54944	3
0	0	2.88957	3.23845	3
1.14441	1.93703	0	0	3
0	3.74094	2.43154	0	3
0	0	0.870381	0.269798	3
0	2.48545	2.3255	0	3
3.47515	0	0	3.27077	3
0	5.27679	2.16803	0	3
1.26868	0	0	0.428695	3
2.83528	1.26946	0	0	3
1.91494	0.342301	0	0	3
2.15089	1.01519	0	0	3
0	2.59391	0.479268	0	3
2.85494	0.758715	0	0	3
0	0	1.06444	0.569853	3
0	0	3.36394	1.01698	3
0.367943	2.22338	0	0	3
0.181393	1.51491	0.11821	0	3
0	0	0.324348	4.40108	3
0	0	1.00864	1.40184	3
0.282296	1.06027	0	0	3
2.39155	2.62579	0	0	3
0	0	2.4441	4.46299	3
0.0417355	1.47223	0	0	3
6.50051	0	0	4.31853	3
0.709358	3.1275	0	0	3
0.381666	0.599912	0	0	3
2.11332	0	0	1.66276	3
0	0.70794	1.50034	0	3
0.997146	0.151465	0	0	3
1.75796	0	0	0.915383	3
0	2.27169	2.36283	0	3
2.5109	0	0	4.44165	3
0	0.773755	1.76963	0	3
1.43381	1.69184	0	0	3
1.38617	0.0238239	0	0.0407583	3
0.103113	2.34618	0	0	3
1.8941	0	0	0.546082	3
0	0.199193	0.500918	0	3
2.54033	1.28521	0	0	3
0	0.36139	4.59636	0	3
0	0.879972	1.67838	0	3
2.93221	1.49803	0	0	3
1.3556	2.02265	0	0	3
2.45576	1.95069	0	0	3
0	0	0.230884	0.508856	3
0	2.62537	1.4675	0	3
0	0.909925	1.16089	0	3
0	0	0.38835	2.15843	3
1.64183	0	0	0.347946	3
2.73446	0	0	1.55728	3
0.912781	0	0	2.6235	3
0	0.628271	3.35799	0	3
1.16501	1.86782	0	0	3
4.46556	3.30946	0	0	3
0	2.11658	2.4621	0	3
1.57621	1.22613	0	0	3
0.911487	0	0	4.1629	3
0	2.11576	4.16162	0	3
1.77648	1.72179	0	0	3
2.21888	0	0	1.56338	3
0	0	4.09905	3.26507	3
0	1.33205	0.45979	0	3
1.29897	0	0	2.39232	3
2.41015	0	0	1.17437	3
0.253514	4.091	0	0	3
3.24535	2.91486	0	0	3
3.30692	2.94059	0	0	3
0.614213	1.12292	0	0	3
0	0	0.43576	1.15974	3
1.96513	0	0	3.20471	3
1.18326	0	0	1.94994	3
0	0	2.85087	3.22661	3
4.21432	0	0	1.17296	3
1.03586	0	0	0.796731	3
0.470453	0	0	1.32198	3
0.563387	0	0	2.17196	3
1.08583	0	0	2.9571	3
0.740891	1.13956	0	0	3
0	0	1.40143	2.82231	3
0.781159	0	0	1.6115	3
1.08915	0	0	3.06088	3
0	0	0.33944	1.70865	3
0	1.18288	1.69142	0	3
0	0.0481659	1.7168	0	3
2.41482	0	0	0.744375	3
0	0	0.803098	4.18198	3
0	0.0964198	2.02426	0	3
0	1.1211	3.79456	0	3
0	0	2.18909	3.30067	3
1.83111	0	0	1.11145	3
1.03603	1.6605	0	0	3
3.11167	0	0	0.306514	3
5.53933	0.246156	0	0	3
1.37598	0	0	2.93808	3
0	0	0.653195	1.68745	3
0	1.64159	1.12846	0	3
0	0.228692	0.953127	0	3
1.49572	3.08393	0	0	3
0	4.95598	2.04167	0	3
0	0.541242	2.40564	0	3
0	1.81752	2.96283	0	3
0.0715481	0	0	0.298641	3
0.0741973	3.97641	0.164396	0	3
1.41952	0.24501	0	0.0290154	3
4.48868	0	0	2.3375	3
1.13391	0	0	2.66345	3
0	0	4.8764	1.03509	3
1.29214	4.04623	0	0	3
0	0	3.14488	1.55513	3
0	0.363816	3.14797	0	3
0	4.32834	3.86864	0	3
0	0	0.332968	2.568	3
0	0.623206	1.61212	0	3
0	1.80898	0.875039	0	3
0	0.815751	1.72331	0	3
0	0	1.12674	1.00093	3
1.98186	1.25331	0	0	3
0.426741	0	0	0.313533	3
0.381525	1.7599	0	0	3
0	0.209498	1.40371	0	3
0	0	1.28059	4.9462	3
0.308338	2.10214	0	0	3
0	1.07101	3.0987	0	3
1.77146	0	0	1.27877	3
1.3155	0	0	0.53614	3
3.90772	0	0	3.83116	3
3.79035	0	0	0.48741	3
3.72105	0	0	0.906422	3
0	0	0.43618	1.12266	3
4.58952	0	0	0.62121	3
2.45531	0.663194	0	0	3
0.142878	0.437149	0	0.734189	3
0	1.23031	1.09477	0	3
1.06143	0.921543	0	0	3
0.93542	4.71042	0	0	3
0	2.32444	2.92337	0	3
1.64364	1.12061	0	0	3
0	2.86717	1.84867	0	3
0.996626	0	0	2.84809	3
0.311799	2.88995	0	0	3
0	1.07194	1.2891	0	3
0	0.113426	0.515107	0.473662	3
0.778726	0	0	3.76355	3
0.374038	0.651644	0	0	3
1.13727	0	0	3.34051	3
1.99895	1.43618	0	0	3
0	2.25309	2.2713	0	3
0	0.850477	0.530103	0	3
2.2793	0	0	1.28917	3
3.61948	2.14784	0	0	3
0	0.546169	0.589031	0	3
0.63151	0	0	2.98303	3
2.17329	0	0	4.09187	3
0.374584	0	0	0.373729	3
0.0659417	2.22974	0.091883	0	3
3.92368	0	0	2.86256	3
0	0.484962	0.952414	0	3
0	1.838	3.42349	0	3
2.30298	0	0	1.05534	3
2.72611	6.30377	0	0	3
2.43322	2.87641	0	0	3
0	0	1.31441	2.09846	3
0.750892	1.54572	0	0	3
2.71218	0	0	0.700804	3
0	0	4.69595	0.464657	3
2.11644	5.76688	0	0	3
0.88156	1.37563	0	0	3
4.63573	0.0179142	0	0.762049	3
1.92648	0	0	1.88527	3
1.1236	0.615734	0	0	3
0	0	0.516573	1.11968	3
1.03416	1.05165	0	0	3
4.1872	1.37806	0	0	3
0	2.65757	1.33074	0	3
0	1.53976	0.431019	0	3
0.721739	1.41902	0	0	3
0.168512	2.8681	0	0	3
0.376442	0.515464	0	0	3
1.0338	2.13207	0	0	3
0	0	0.967403	0.487853	3
0	0	4.02743	0.278298	3
0.870837	0	0	1.63626	3
0	2.50831	0.72991	0	3
1.2813	1.26319	0	0	3
3.3947	4.93051	0	0	3
0.034827	3.59167	0.0884077	0	3
0	1.23264	0.875078	0	3
2.61648	0.634919	0	0	3
1.09805	0	0	1.46799	3
0.514047	0	0.13345	0.561136	3
3.11374	2.00871	0	0	3
4.34588	0	0	2.71637	3
1.21332	2.06991	0	0	3
2.80093	5.12136	0	0	3
0	0	2.67415	2.08133	3
0	0	1.80427	1.93635	3
0.525499	3.3509	0	0	3
1.94445	0.64801	0	0	3
0.280632	0	0	6.38341	3
2.94533	3.17736	0	0	3
0	0	3.59443	2.1335	3
3.89395	6.55864	0	0	3
2.14513	1.88583	0	0	3
0	0	4.78688	5.74652	3
3.79905	0	0	1.64479	3
0.766702	0	0	3.30531	3
4.58147	0	0	4.02623	3
0	1.62757	0.850231	0	3
0	0.451947	0.722585	0	3
0.580064	0	0	3.50176	3
0	0	1.69327	1.55976	3
0	2.69423	1.74343	0	3
1.88765	1.70835	0	0	3
3.04478	0	0	4.59021	3
0	0	2.31138	4.84927	3
3.63304	4.13686	0	0	3
0	0	1.35384	1.34066	3
0	3.3211	0.986161	0	3
3.44316	0	0	2.62267	3
1.07099	0	0	0.0248982	3
2.05968	0.350412	0	0	3
1.35885	0.814461	0	0	3
3.56529	0	0	5.24794	3
0	0	1.4039	0.555196	3
1.44226	0	0	3.37847	3
0	0.501955	3.83578	0	3
0.643463	0	0	1.70211	3
0.620847	0	0	0.831742	3
0	4.22169	0.935675	0	3
0	3.96112	2.00344	0	3
2.83199	0	0	3.09321	3
0.966964	0	0	1.50088	3
0	0	0.572098	2.77041	3
2.96911	0	0	1.50004	3
0	0	3.1572	0.299576	3
0	2.85865	0.502458	0	3
4.71478	0	0	3.06705	3
0	0	0.83614	0.426414	3
0.370646	0	0	4.04688	3
0.0222656	0.68309	0.176231	0	3
0.118944	3.27868	0	0	3
0	1.42227	3.15659	0	3
0	0.749528	1.32219	0	3
0	1.81867	0.908552	0	3
1.73976	4.69928	0	0	3
2.61238	0	0	2.3367	3
0	0	2.96515	0.819027	3
2.86656	1.59151	0	0	3
0.0549616	4.37098	0.0682168	0	3
0.270784	1.96241	0	0	3
2.02542	2.5511	0	0	3
0	5.98108	1.05825	0	3
0.0506518	2.3998	0.0674083	0	3
0.150063	0.132805	0	0	3
0	2.05807	0.0443789	0	3
0.0769244	0	0.281986	0.646145	3
8.6879	2.65139	0	0	3
1.83941	0	0	3.57604	3
0.712167	1.60695	0	0	3
2.16108	2.92143	0	0	3
2.25631	6.1637	0	0	3
0	0	1.90406	2.29444	3
0.356317	3.72789	0	0	3
0	0	1.19146	0.268365	3
0.36479	4.18474	0	0	3
0	0	1.67292	5.54539	3
2.41581	0	0	1.81027	3
1.56606	0	0	0.777343	3
0	0	3.07393	1.03515	3
4.78373	0	0	1.18202	3
0.0715129	3.6917	0.0105338	0	3
0	0.843143	0.806803	0	3
0.436082	3.08819	0	0	3
1.44811	4.46425	0	0	3
1.15364	0	0	4.24314	3
0.598045	4.17164	0	0	3
0	0.826063	2.68071	0	3
0.666679	0	0	4.20872	3
0	0	2.53738	0.271313	3
0	2.46506	1.71987	0	3
0	0	0.408188	2.34846	3
0	2.7575	0.823287	0	3
0	0	2.95088	4.33196	3
4.9026	0.146764	0	0.454947	3
0	0.873489	0.445358	0	3
0.221003	0	0	1.79909	3
0.696571	3.54848	0	0	3
1.5427	1.26157	0	0	3
0	4.17692	0.325962	0	3
0	0	2.44174	4.64739	3
0.658922	5.24921	0	0	3
0.75824	0	0	0.496937	3
0.884864	1.0334	0	0	3
0	4.09782	4.9815	0	3
0.313223	0	0	1.0096	3
0	3.71825	3.13712	0	3
0	1.32085	0.885055	0	3
0	0	3.29913	2.37755	3
4.92666	1.61001	0	0	3
0.334485	0	0	5.14597	3
2.09554	3.77539	0	0	3
0	0	1.42707	2.76548	3
0.245484	0	0	0.779104	3
0.986317	0	0	0.542315	3
1.34929	3.28449	0	0	3
4.11482	0	0	1.67703	3
0.798392	2.82128	0	0	3
0.505597	0	0	0.920168	3
0.854195	2.14327	0	0	3
0	4.41877	0.584083	0	3
1.83689	0	0	2.11625	3
1.19977	1.25445	0	0	3
0	0	3.83262	2.21061	3
2.1951	0	0	2.28577	3
0.141735	0.344378	0.0906276	0	3
0	0	0.912946	1.78271	3
0	0	2.3302	0.612034	3
1.13762	1.4798	0	0	3
0	0.40389	1.68718	0	3
0	2.80492	0.696056	0	3
0.572824	0	0	2.8748	3
0	1.5925	2.31685	0	3
0.355692	0	0	0.184375	3
0.713942	2.54783	0	0	3
0	0	2.54092	3.55498	3
0.310705	0	0	1.07075	3
0.0725768	1.95512	0	0	3
0.909203	0	0	0.351292	3
0	0.0769917	3.92286	0.214294	3
0	1.63269	1.41349	0	3
0	0.836414	0.660089	0	3
0	3.09959	3.47008	0	3
2.34417	1.88005	0	0	3
0	0	2.5963	2.45364	3
0	0	5.00454	1.84458	3
2.65811	2.5144	0	0	3
0.494982	0.731488	0	0	3
5.95135	1.17872	0	0	3
3.43654	3.06526	0	0	3
1.44247	0.211885	0	0.227402	3
1.99504	5.10157	0	0	3
0.623351	0	0	1.6917	3
0	0	1.82046	1.73245	3
4.41326	0	0	0.704887	3
0	0	2.28789	1.24853	3
0	0.0964679	1.75729	0.0282211	3
7.63719	0	0	0.626731	3
0	0.776131	2.97137	0	3
3.46995	0	0	2.26331	3
0.412845	5.32832	0	0	3
2.94596	4.42401	0	0	3
0.842697	0	0	2.35623	3
0	0.312381	1.12577	0	3
0.335482	0	0	2.53636	3
0.46895	3.14692	0	0	3
4.12115	4.70947	0	0	3
4.17889	1.7714	0	0	3
0	0	2.55556	2.88039	3
0	3.17894	2.79088	0	3
0.419405	0.447964	0	0	3
3.07051	3.49046	0	0	3
2.55629	0.104316	0	0.29752	3
2.55181	0	0	0.856818	3
0.889941	1.01939	0	0	3
2.50236	0.0874555	0	0.0283052	3
1.2227	1.22423	0	0	3
2.21677	2.24489	0	0	3
0	0	3.34252	0.488166	3
0	0.833919	0.147559	0	3
2.582	0.559104	0	0	3
0	0.667286	0.592256	0	3
2.7011	0	0	3.29982	3
1.63774	1.14334	0	0	3
0	0	0.586996	1.38476	3
2.09489	0	0	3.85655	3
0	0	0.388205	0.413044	3
3.13715	0.0912289	0	0	3
0.176255	4.53177	0	0	3
0	1.21856	1.45623	0	3
0	0	1.63778	1.55306	3
0	0	2.47585	1.06755	3
2.36159	0	0	3.82434	3
0	0	3.83528	0.382069	3
0.263355	0.117845	0	0	3
0	0	3.07021	2.02462	3
0	4.05102	1.71643	0	3
3.07749	0	0	1.44561	3
1.10232	1.55591	0	0	3
2.45788	1.97818	0	0	3
0.783133	0	0	1.52248	3
0	1.05373	1.80748	0	3
5.51914	0	0	2.64566	3
0	2.84406	2.11759	0	3
0	0	1.04655	0.620068	3
0	0	3.45517	1.81958	3
0.839643	1.53533	0	0	3
0	0.086096	1.99108	0	3
5.90441	0	0	0.352549	3
2.4488	1.08505	0	0	3
1.52907	0	0	3.03189	3
0	0	3.69397	0.442216	3
1.69587	1.45037	0	0	3
0.0303655	0.314817	0.00625352	0	3
0	2.23522	0.655808	0	3
0.605828	0.765136	0	0	3
0.205691	0	0	2.64239	3
0.344129	0	0	1.05706	3
0.744731	0	0	2.5316	4
2.64613	0	0	0.750455	4
3.74511	2.38355	0	0	4
0	0	1.24854	1.98855	4
0	0	1.18885	2.08719	4
1.46787	3.62768	0	0	4
1.46794	0	0	2.52072	4
0	0	0.312307	4.73454	4
0.50315	2.25145	0	0	4
0	0	0.906483	1.77697	4
0	0	1.58265	0.837616	4
1.54138	0.553198	0	0	4
0	0.145137	2.78307	0	4
0	0	2.72342	0.470226	4
1.42215	0	0	2.41488	4
0.362148	2.82583	0	0	4
0	0.110182	1.28062	0.0519695	4
1.60153	0.37471	0	0	4
1.72243	0	0	1.02256	4
0.0742244	0.459629	0.00169041	0	4
0.556059	0	0	0.771629	4
0	0.780052	0.971131	0	4
2.27528	0	0	0.502177	4
0.0967646	1.2632	0.129972	0	4
0	0	0.772768	2.74742	4
0	1.06718	0.963848	0	4
2.44548	1.11151	0	0	4
1.83611	0	0	5.24129	4
0.0872721	0	0.0342267	3.14983	4
1.48615	0	0	0.616034	4
0	1.36782	0.923834	0	4
0.759178	0	0	1.29958	4
0	0	1.217	0.507122	4
3.33926	0.967744	0	0	4
0	0	0.229386	2.86236	4
0	0.853143	2.22181	0	4
1.50314	0	0	1.06988	4
4.27052	1.24204	0	0	4
0	0	2.45752	2.48061	4
0.213835	4.09404	0	0	4
1.7426	0	0	0.598949	4
0.80063	0	0	1.72296	4
2.11268	1.94298	0	0	4
1.22334	0	0	0.958261	4
0	2.82552	4.4489	0	4
0	0.970148	0.249293	0	4
0.728926	0	0	2.03714	4
1.84266	0	0	1.43506	4
0	0.666221	1.18394	0	4
0	0	0.243173	0.443656	4
0.675289	0.0987965	0	0.0506752	4
0	0.0364498	2.9429	0.00952759	4
2.08973	0	0	1.75222	4
0	0	2.78157	3.35914	4
1.15548	0.631891	0	0	4
0	0	2.15929	3.23716	4
0	0	0.896748	0.442059	4
1.01211	0.366056	0	0	4
0	0.0395031	0.116996	0.136903	4
0.63963	0	0	0.433416	4
0	0	0.837896	1.2724	4
0	0	0.288044	3.4395	4
0	0	1.69311	0.129727	4
1.5351	1.49385	0	0	4
1.03674	0.966879	0	0	4
0.686066	0.018664	0	0.0113403	4
0.992552	0	0	2.51381	4
0	1.68281	1.42052	0	4
0	0	0.930696	2.49032	4
3.76583	0.781059	0	0	4
2.18076	0.820797	0	0	4
0	0	0.486005	1.94128	4
0	1.93537	0.054376	0	4
0	1.603	1.79906	0	4
0	0	2.60862	0.874903	4
0.545197	2.25092	0	0	4
0	1.46886	0.600923	0	4
0.326833	2.59692	0	0	4
2.27571	0	0	1.10527	4
2.03249	2.74407	0	0	4
2.76128	0	0	1.16415	4
1.27214	1.03177	0	0	4
1.01142	2.68539	0	0	4
0.816217	2.46162	0	0	4
0.046502	0.509935	0.0133633	0	4
0.185537	0	0	0.220055	4
0.330248	0.158715	0	0.0129057	4
0.678948	2.66587	0	0	4
2.84676	2.99152	0	0	4
1.83624	0.422596	0	0	4
0	0	0.741709	1.09847	4
0.884447	0	0	3.79525	4
0	0	0.320846	2.65549	4
0.607876	0.171497	0	0.0299199	4
1.70141	0	0	2.20132	4
0	0	0.115707	1.97749	4
1.50609	0	0	0.501845	4
0	0.314432	0.299351	0	4
0.370704	0	0	2.7352	4
0	0	0.960676	1.54605	4
1.65241	0	0	0.550897	4
1.01229	1.25322	0	0	4
1.2794	0	0	0.759875	4
0	4.96394	0.908078	0	4
1.431	0	0	1.99005	4
3.02232	1.09052	0	0	4
1.01981	0	0	0.786424	4
1.67382	0	0	1.799	4
0.4116	0	0	2.53668	4
0	1.18319	1.02956	0	4
3.01268	1.65041	0	0	4
0	0.162565	1.37699	0	4
0	0	1.88172	0.805528	4
0.356316	0	0.100412	1.61862	4
2.40211	0	0	1.30389	4
0	0	1.87622	2.16578	4
0	3.63653	0.0135355	0	4
1.19579	0	0	1.47323	4
0.0614586	0	0.0282365	4.55464	4
2.18385	1.90188	0	0	4
0	3.65921	0.873075	0	4
0	2.42189	2.92221	0	4
0.693886	0	0	1.06865	4
1.1197	0	0	1.33972	4
0	0	0.0962613	1.00616	4
0	0	2.90977	0.532761	4
1.33493	0	0	1.75253	4
0.49197	0	0	2.96016	4
1.20544	0	0	1.16954	4
0	1.39767	2.65337	0	4
0.988189	0.0206245	0	0	4
1.17361	0	0	0.679273	4
0.413692	0	0	2.75303	4
0.127325	0	0	0.360037	4
0	0	3.16914	2.13182	4
0	0	0.567624	4.02563	4
1.38757	0	0	1.30157	4
1.14811	0	0	5.67417	4
2.33667	0.305632	0	0	4
0.588424	0	0	0.445348	4
0	3.52375	0.190283	0	4
0	0	1.6601	5.21145	4
0.327498	0	0	0.210351	4
1.61029	0	0	1.90375	4
1.52905	0	0	1.50404	4
0.540794	0	0	1.21006	4
1.8112	0.0771851	0	0.0182271	4
2.82496	0.683691	0	0	4
0.863219	2.16307	0	0	4
1.55305	0	0	4.03275	4
3.44616	1.4935	0	0	4
0.167307	0	0	0.72277	4
0	0	1.27859	1.80831	4
1.30988	0	0	1.78925	4
1.91146	0	0	2.38709	4
2.23131	0	0	1.5708	4
0	0	1.74877	0.556299	4
0.365902	0.727753	0	0	4
0	0.357742	0.795502	0	4
0	0.339251	0.90791	0	4
0.969011	0.862018	0	0	4
0	0	0.243969	3.38229	4
0	0	1.38168	0.354696	4
2.66696	0	0	3.11538	4
0	0	0.790585	1.323	4
0	0	0.812463	1.21076	4
0	0	0.980609	2.84995	4
0	0	3.19878	5.12019	4
1.32458	0	0	2.66531	4
0	0	0.259024	1.70326	4
0.48059	0	0	0.0939547	4
0.954656	0	0	3.35744	4
3.05596	1.62294	0	0	4
0	0	1.0917	1.31798	4
2.55487	0.603445	0	0	4
0.455645	0	0	1.90819	4
0.138276	0	0	0.982703	4
1.62449	0.063951	0	0.0294568	4
0	0	1.02023	0.295781	4
0	0	1.50275	1.19415	4
2.62705	0	0	0.273582	4
0	0.0114214	1.20329	0.140703	4
0	0	0.825794	1.21581	4
1.67541	2.84478	0	0	4
0	1.61339	0.202563	0	4
0.271498	0	0	4.73024	4
0	0	0.921486	2.55	4
2.57076	0	0	0.219568	4
0.439397	2.44935	0	0	4
0.133476	0	0	0.400276	4
1.12325	2.51361	0	0	4
1.74383	0	0	0.705896	4
0.347141	0	0	3.29906	4
0	0	0.4164	0.636355	4
0.0194135	0	0.0857823	2.11595	4
1.59768	0.865365	0	0	4
1.23094	2.04569	0	0	4
1.41591	0.19644	0	0	4
1.03258	0	0	3.67681	4
0.69049	0	0	0.892841	4
0	0	1.70248	0.240064	4
0	0	0.711924	2.27982	4
0	0.184663	1.65994	0.0513296	4
0	0	0.462778	1.30978	4
2.05064	0.828941	0	0	4
1.9619	0	0	2.17749	4
0	0	2.30358	1.52983	4
3.67916	4.40035	0	0	4
0	0	0.782256	0.584289	4
1.79047	0	0	0.535304	4
1.42157	0	0	0.517485	4
1.69634	0	0	4.68766	4
0	4.8305	0.303289	0	4
0	0	1.08777	3.90336	4
0	0	1.30904	0.187284	4
0	1.59323	4.54762	0	4
0	0	1.90538	2.87809	4
0	1.15504	0.607931	0	4
3.8018	0.0245573	0	0.195298	4
0	4.27659	0.653016	0	4
0	0.95797	1.38514	0	4
2.08855	0	0	3.81589	4
0	0.113617	1.43761	0	4
2.46954	0	0	1.5171	4
2.96879	0	0	2.11496	4
0	0	0.854994	2.39245	4
3.79221	0.197485	0	0	4
0.547826	2.61406	0	0	4
0.142583	2.56169	0.149563	0	4
0	0	0.13626	0.853768	4
0	0	0.0746709	2.15189	4
0	2.2742	1.32208	0	4
1.05838	0	0	0.540692	4
0	0.214429	0.0455536	0.172373	4
0	1.2271	2.44165	0	4
0.252556	0	0	1.08124	4
1.20386	1.24838	0	0	4
0.568555	4.07822	0	0	4
0.363413	2.41124	0	0	4
0.353681	0	0	3.25514	4
2.84569	2.46343	0	0	4
0	0	0.170497	2.09584	4
0.304203	0	0	2.87709	4
1.04866	0.129676	0	0.60695	4
0	0.641109	2.30176	0	4
0.178908	0	0	1.64263	4
0.815719	0.17101	0	0	4
0.941902	0	0	0.593054	4
0.599465	0	0	2.18451	4
0	2.52029	0.22819	0	4
0	1.62917	2.06278	0	4
2.03169	0	0	0.680631	4
0	0	1.23257	3.1709	4
1.78788	0.195392	0	0	4
0	0	1.7691	2.19256	4
0.341926	0	0	1.75495	4
0	0.643661	1.99388	0	4
2.25718	0.190848	0	0.0499487	4
1.39492	0.341107	0	0	4
0	0	0.265823	0.823204	4
0	3.95486	0.459397	0	4
0	0.996117	3.00993	0	4
0	1.26004	1.02716	0	4
2.67807	2.45199	0	0	4
0.0827563	1.57784	0	0	4
0	0	0.269919	2.78096	4
1.31507	1.98069	0	0	4
1.42298	3.26473	0	0	4
0.299968	0	0	2.77413	4
0	0	0.558978	1.57802	4
0	0	2.18948	3.91828	4
0	2.53392	0.332423	0	4
0	0	0.331031	1.65535	4
0	1.95992	1.76185	0	4
0.661154	0	0	0.630975	4
0	0	0.431618	0.169091	4
0	0	0.728925	0.667663	4
1.58786	0.460908	0	0	4
0.339537	2.62157	0	0	4
0.0469106	2.55137	0.07696	0	4
2.21423	0	0	0.274153	4
2.96345	0.058986	0	0	4
0	0	2.2442	1.99302	4
0	3.36358	0.302834	0	4
0	3.43806	0.47552	0	4
0	0	0.0897639	1.17585	4
0.455908	0	0	0.332987	4
0	0.102891	1.4791	0.0177247	4
0	2.03793	1.08375	0	4
0.615015	2.39268	0	0	4
0	1.77111	0.558475	0	4
0	0	1.94192	1.33069	4
0.149212	0.981538	0	0	4
2.88303	0	0	1.67217	4
2.25935	0	0	2.17316	4
1.49304	0	0	2.26061	4
0	0.817389	4.9171	0	4
0.124675	1.13407	0	0	4
0.362244	1.95935	0	0	4
0	0	0.944585	0.442862	4
1.27896	3.36634	0	0	4
1.34596	0	0	1.75907	4
2.34892	1.88607	0	0	4
1.06536	0	0	3.22638	4
0	0.69843	0.567398	0	4
0.275051	0	0	2.56673	4
1.04497	1.21505	0	0	4
0	0	0.617833	5.14771	4
0	1.65543	1.25595	0	4
0.487649	0	0	4.57249	4
3.27315	0.0452997	0	0.0402273	4
0.759554	0	0	1.49069	4
0	1.67828	1.2386	0	4
0.963706	0.329769	0	0	4
0.658064	0.967719	0	0	4
0	0	0.397245	1.38488	4
0	0	1.74555	1.1108	4
0.67	3.05055	0	0	4
1.03261	1.05585	0	0	4
0	2.46645	0.591642	0	4
1.28462	0.211825	0	0.0839187	4
0	0	1.63061	0.102206	4
0	2.06596	0.0968958	0	4
1.3798	0	0	1.04472	4
3.65242	1.72884	0	0	4
0	0.0722422	0.055269	0.0288361	4
1.52604	0.209204	0	0	4
0	0	0.531805	2.39045	4
0.320948	1.39354	0	0	4
0	0	1.43415	0.682051	4
0	1.00888	0.443836	0	4
0.0804027	0	0.0872691	1.28771	4
1.6934	0	0	0.0641412	4
0.934222	0	0	0.636356	4
1.33703	0	0	3.02229	4
1.7463	1.01022	0	0	4
1.53111	0	0	0.723862	4
1.26335	1.92835	0	0	4
0	0.012397	1.43932	0.130868	4
0	0	2.65725	2.30005	4
0	2.18709	3.13023	0	4
0	0	2.34035	0.433896	4
1.53659	0.391677	0	0	4
0	0	1.86373	1.54348	4
3.1391	0	0	5.0021	4
0	0	2.06323	1.0228	4
0.471436	0.219455	0	0	4
1.42472	0.153643	0	0	4
2.77922	0.295817	0	0	4
2.12554	0	0	2.53395	4
0.0418172	0	0.158274	4.42742	4
2.29367	0	0	4.91968	4
1.79787	0	0	1.3138	4
2.83766	2.70509	0	0	4
2.40551	0	0	1.10943	4
0.540887	0	0	0.129106	4
0	0	2.81453	1.39786	4
0	0.368717	3.16902	0	4
0	0.505417	1.01266	0	4
3.01172	1.3425	0	0	4
1.86658	1.52531	0	0	4
0	2.08637	1.10925	0	4
3.12233	0.397041	0	0	4
1.2135	0	0	0.232212	4
0.593969	0.112269	0	0	4
0	0.900483	1.10439	0.19319	4
0.903875	0	0	2.66431	4
0.0375082	0	0.281891	2.53217	4
0	0	0.770945	2.93199	4
0	0	1.30423	0.771979	4
0	0.0714662	0.91332	0.0511726	4
0	0	0.775041	1.51051	4
0	2.39397	0.815406	0	4
0	0	3.89129	2.19703	4
3.02345	0	0	2.64656	4
0.409597	0.591163	0	0	4
0	0.990694	0.0936953	0	4
1.16858	3.33364	0	0	4
0	0	0.78931	1.42229	4
0	0	0.594969	0.587486	4
0	1.3062	1.26959	0	4
0.481355	0.0946426	0	0.0690343	4
0.00377334	0	0.0666859	0.118951	4
0	0	0.305974	0.984176	4
1.98261	2.98998	0	0	4
1.2015	0	0	0.801722	4
0.767104	1.39742	0	0	4
0.809752	0	0	0.142977	4
0	0	2.95297	2.53802	4
0	0	0.273343	0.196416	4
0.46533	0	0	0.96205	4
0.0397329	1.8422	0.22189	0	4
0.47255	0	0	4.0995	4
1.30646	0.985579	0	0	4
0	0	0.651634	2.91387	4
1.65257	0	0	5.03361	4
0	0.353874	0.215282	0	4
0.388123	2.57566	0	0	4
0	0	1.41031	0.923433	4
0.780085	0.765982	0	0	4
0	0	0.80237	1.26476	4
0.829647	0.174163	0	0	4
1.35662	0	0	1.71274	4
1.94489	1.05999	0	0	4
2.42186	0	0	1.97007	4
0.193375	0	0.144533	0.573336	4
2.45139	0	0	1.00217	4
2.07016	0.0759628	0	0	4
1.58662	1.43059	0	0	4
0.300165	1.53751	0	0	4
0	0	1.22356	0.872573	4
0.746908	0	0	1.21346	4
1.78258	0.064143	0	0.188869	4
0.0346565	0	0	1.42787	4
1.48919	0	0	1.39369	4
1.21637	2.6802	0	0	4
0	0.592878	0.138984	0	4
1.42316	0	0	1.77576	4
0.0666158	0	0	2.69343	4
0.908793	0	0	0.875998	4
0	0	0.487772	2.09858	4
0	0	0.610932	0.141745	4
0	0	2.27625	5.33713	4
1.91756	0	0	1.99668	4
5.83557	1.87015	0	0	4
0	0	0.66456	1.45242	4
2.8306	0.728515	0	0	4
0.165598	0	0	0.542945	4
0	0	1.11448	3.00492	4
0	0.386595	1.51247	0	4
0.795124	1.29518	0	0	4
0.794087	0	0	4.82371	4
0.248952	1.71769	0	0	4
0	1.01478	0.805781	0	4
0	0	1.47046	1.30159	4
2.88304	1.7288	0	0	4
1.19786	0	0	0.865321	4
0.726091	0.535033	0	0	4
1.80227	0.62883	0	0	4
1.50687	2.56858	0	0	4
0	0	0.875387	0.258618	4
0	0	0.691124	2.091	4
0	0	0.349636	0.974292	4
1.57688	0	0	1.24491	4
0.128224	0.471409	0.314191	0	4
1.20257	0.78441	0	0	4
1.30004	0	0	0.547954	4
1.88829	0	0	0.356328	4
0	0	1.13381	1.03523	4
0.173778	3.03288	0	0	4
0.427678	1.1533	0	0	4
1.56895	0	0	2.76674	4
0.951433	1.50106	0	0	4
0	0.411486	1.30714	0	4
2.18192	0	0	2.38251	4
1.07704	0	0	1.73785	4
1.13959	0.628667	0	0	4
0	0	2.70811	1.5478	4
0	2.38857	1.49609	0	4
0	0	1.59967	1.97289	4
0	0	1.36412	2.08421	4
0.0334593	2.05976	0.0227449	0	4
0.42219	0	0	2.23081	4
0	0	0.739931	1.50293	4
0	1.28523	0.0782594	0	4
0.172983	1.724	0	0	4
0.943009	0.167471	0	0	4
0	0.0421381	0.424523	0.0221077	4
0	1.3599	0.98313	0	4
0.8825	0.00270918	0	0.00224185	4
1.72151	0	0	2.47785	4
0	1.06891	1.5036	0	4
3.52248	1.04648	0	0	4
0	1.45761	0.571209	0	4
0	0	0.596208	3.2467	4
1.82529	0	0	2.02091	4
0.437466	2.60292	0	0	4
2.87687	1.80714	0	0	4
0	0	1.31145	0.623868	4
0.341661	1.79687	0	0	4
0.494336	0	0	0.540606	4
0.211007	3.6273	0	0	4
1.88252	1.52482	0	0	4
2.03046	1.27339	0	0	4
0	0	0.672715	1.5632	4
2.18621	0.955903	0	0	4
0	3.035	1.27282	0	4
0.0903038	0.9926	0	0	4
0	0	1.78232	1.07209	4
0	2.58473	0.0833429	0	4
1.953	0	0	2.28949	4
0	0	0.520185	0.565837	4
0	0	0.639658	3.8157	4
0.118428	0.574732	0.110716	0	4
0.100625	0	0	2.17743	4
2.8846	0.17163	0	0	4
0.16244	0	0.0880478	2.40502	4
0.713866	0.700574	0	0	4
1.49656	0	0	1.849	4
[truncated: 501 more rows]

[truncated: 14 more sheets: Fig. S5b, Fig. S5c, Fig. S5d, Fig. S6a, Fig. S6b, Fig. S8a, Fig. S8b, Fig. S8c, Fig. S9a, Fig. S9b, Fig. S10b, Fig. S10c, Fig. 11d, Fig. S13b]
